# Supplementary material for: Synthesis and Antifungal Activity of New butenolide Containing Methoxyacrylate Scaffold
Source: MDPI journal article supplement (doi:10.3390/molecules27196541), 2022-10-03
Supplement: s1 [file s1]

## Supporting Information

### Synthesis and antifungal activity of novel butenolide containing methoxyacrylate scaffold

Zhang, Qian   Li, Yihao   Zhao, Bin   Xu, Leichuan   Ma, Haoyun   Wang, Mingan\*

Innovation Center of Pesticide Research, College of Science, China Agricultural University, Beijing 100193, China

\* Corresponding author. M. A. Wang, Tel.(Fax):86-10-62734093; E-mail: wangma@cau.edu.cn

#### Contents

|                                                                                                                                                                                      |     |
|--------------------------------------------------------------------------------------------------------------------------------------------------------------------------------------|-----|
| 1. The <sup>1</sup> H and <sup>13</sup> C NMR spectra of intermediates and target compounds <b>III-7~III-10, III-12, III-14, IV-7~IV-10, IV-12, IV-14</b> and <b>V-1~VI-14</b> ..... | S2  |
| 2. The high resolution mass spectrometry report spectra of compounds <b>VI-3, VI-8</b> and <b>VI-13</b> .....                                                                        | S41 |
| 3. The X-ray crystal structure of target compound <b>IV-6</b> .....                                                                                                                  | S42 |
| 4. The cell variance of <i>S. sclerotiorum</i> treated with <b>VI-3</b> and TRI observed by TEM.....                                                                                 | S47 |
| 5. The mycelium growth inhibition of <i>S. sclerotiorum</i> treated with <b>VI-3</b> and TRI by SEM.....                                                                             | S48 |
| 6. Interaction of compounds <b>V-3, V-6, VI-7</b> and TRI with target by molecular docking.....                                                                                      | S49 |

1. The  $^1\text{H}$  and  $^{13}\text{C}$  NMR spectra of intermediates and target compounds **III-7~III-10**, **III-12**, **III-14**, **IV-7~IV-10**, **IV-12**, **IV-14** and **V-1~VI-14**

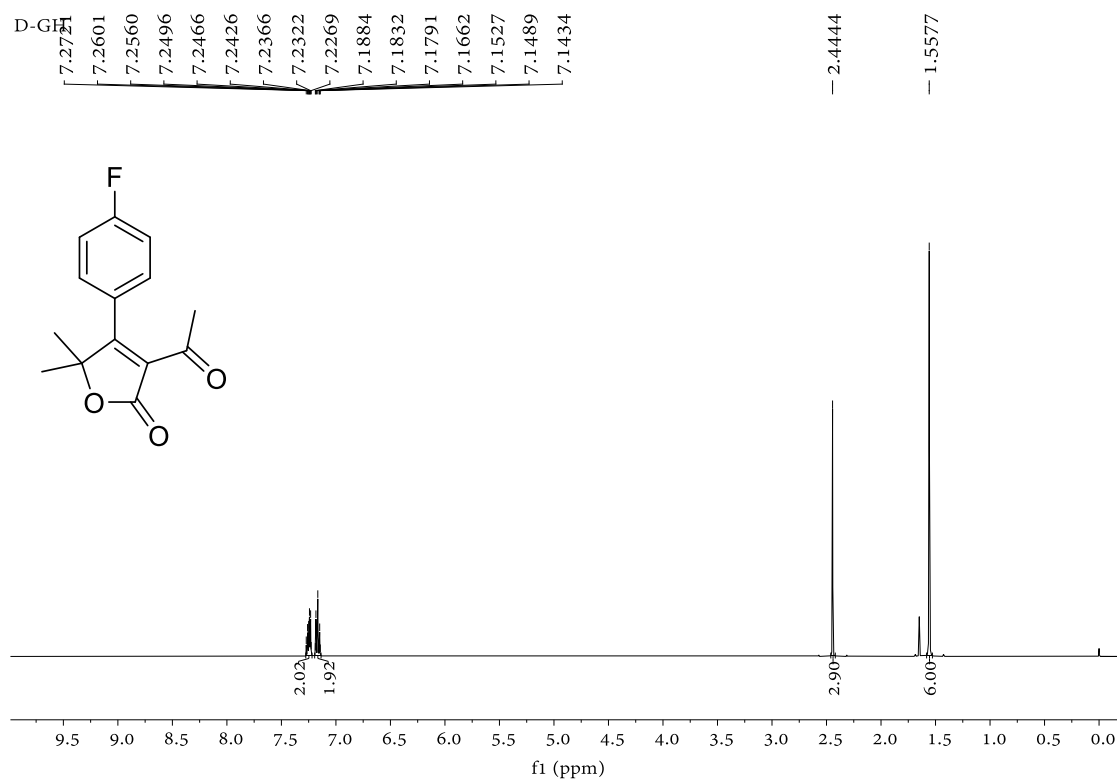

**Figure S1**  $^1\text{H}$  NMR of compound **III-7** (500 MHz,  $\text{CDCl}_3$ )

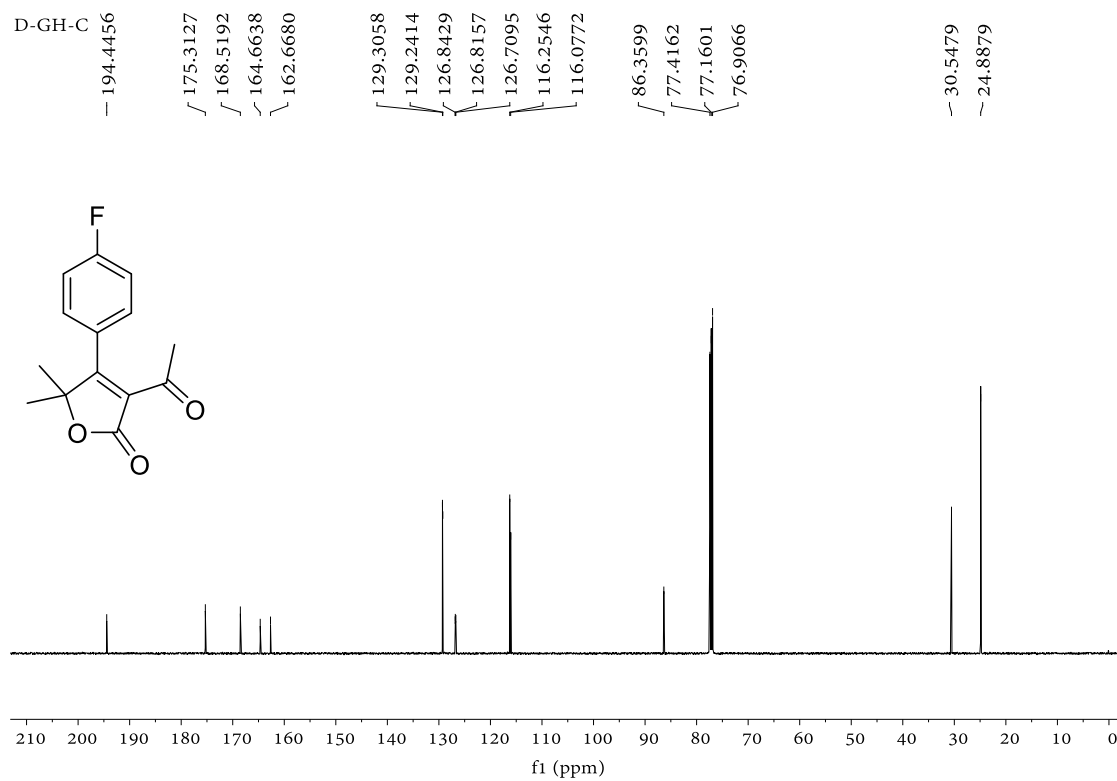

**Figure S2**  $^{13}\text{C}$  NMR of compound **III-7** (126 MHz,  $\text{CDCl}_3$ )

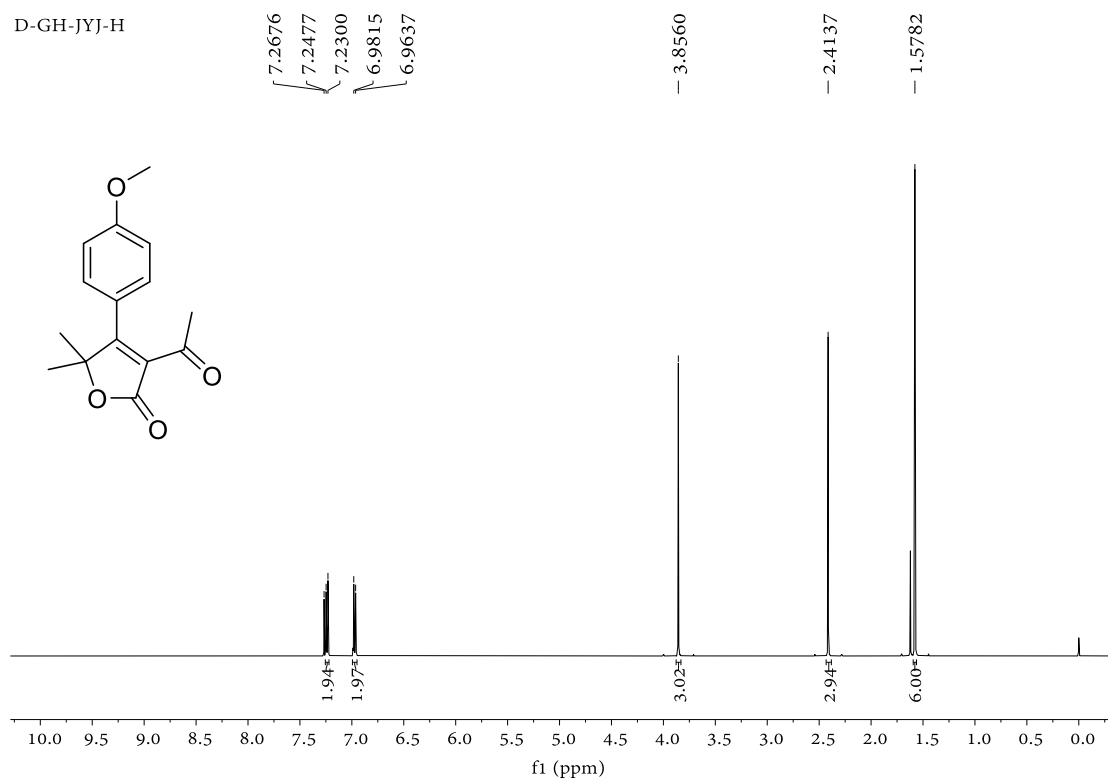

**Figure S3**  $^1\text{H}$  NMR of compound **III-8** (500 MHz,  $\text{CDCl}_3$ )

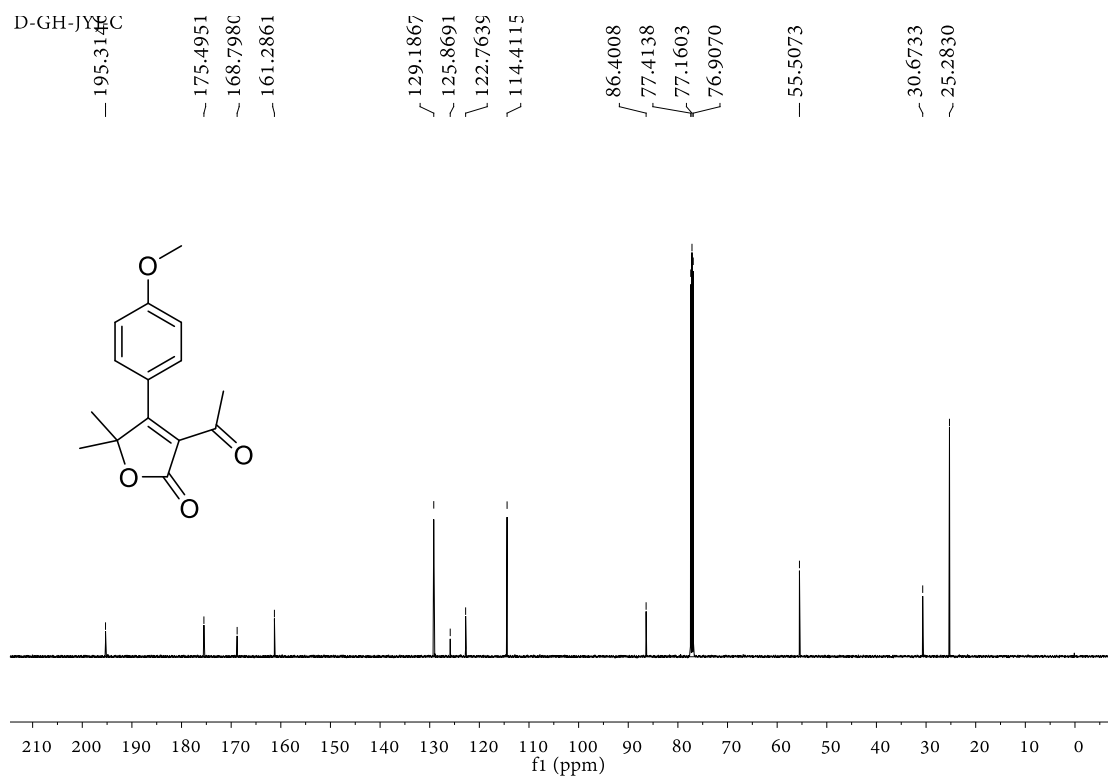

**Figure S4**  $^{13}\text{C}$  NMR of compound **III-8** (126 MHz,  $\text{CDCl}_3$ )

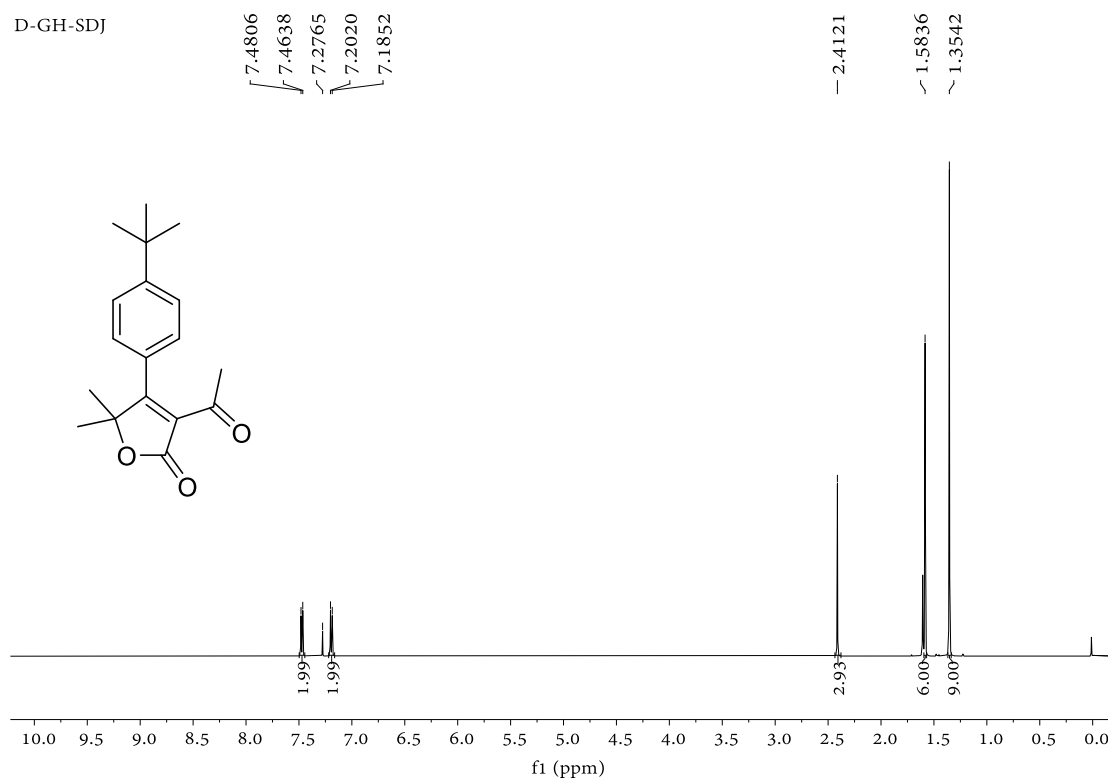

**Figure S5**  $^1\text{H}$  NMR of compound **III-9** (500 MHz,  $\text{CDCl}_3$ )

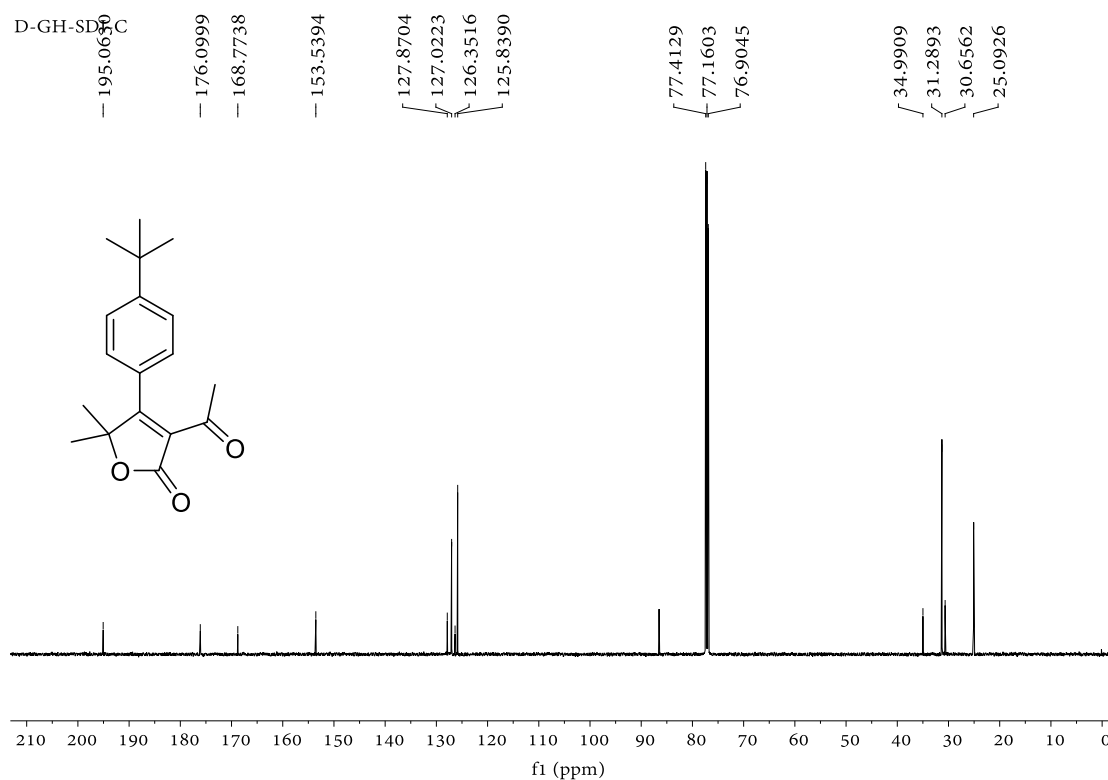

**Figure S6**  $^{13}\text{C}$  NMR of compound **III-9** (126 MHz,  $\text{CDCl}_3$ )

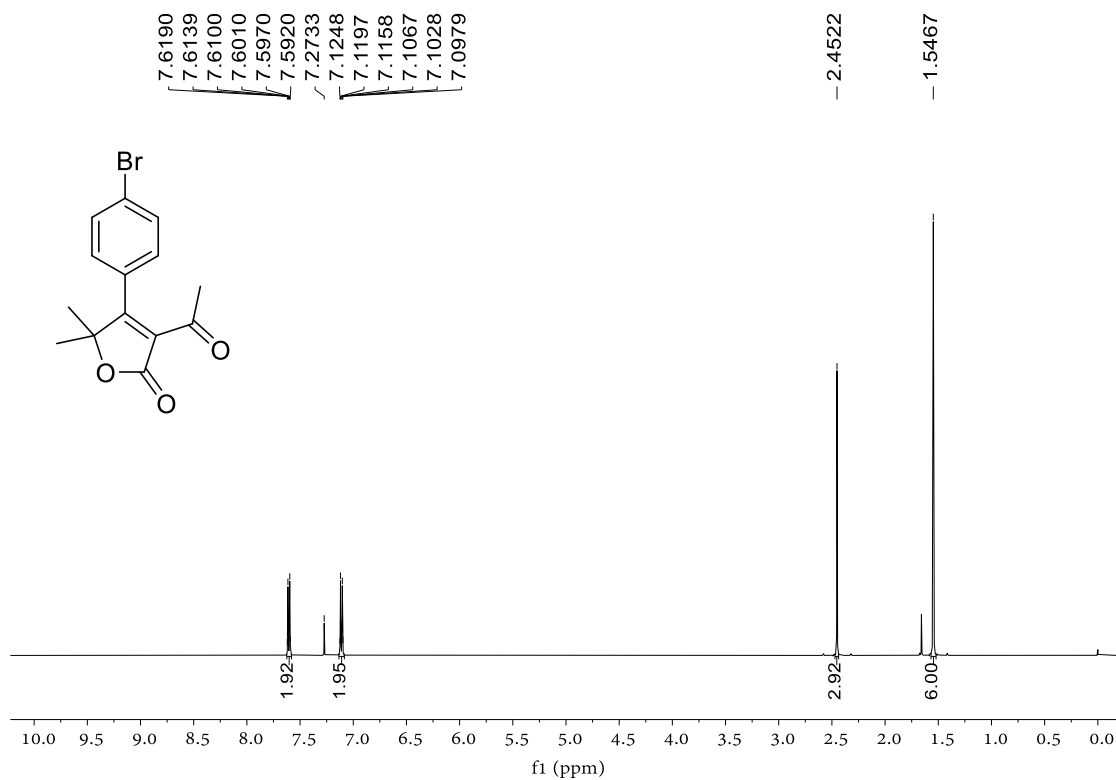

**Figure S7** <sup>1</sup>H NMR of compound **III-10** (500 MHz, CDCl<sub>3</sub>)

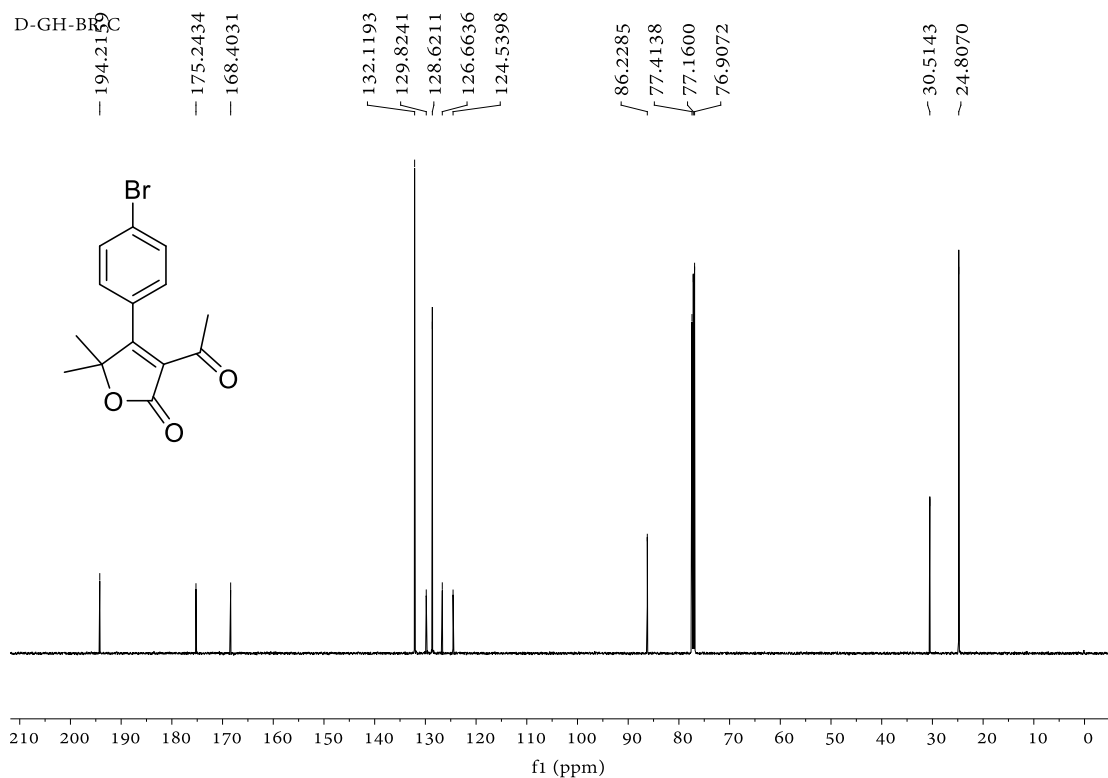

**Figure S8** <sup>13</sup>C NMR of compound **III-10** (126 MHz, CDCl<sub>3</sub>)

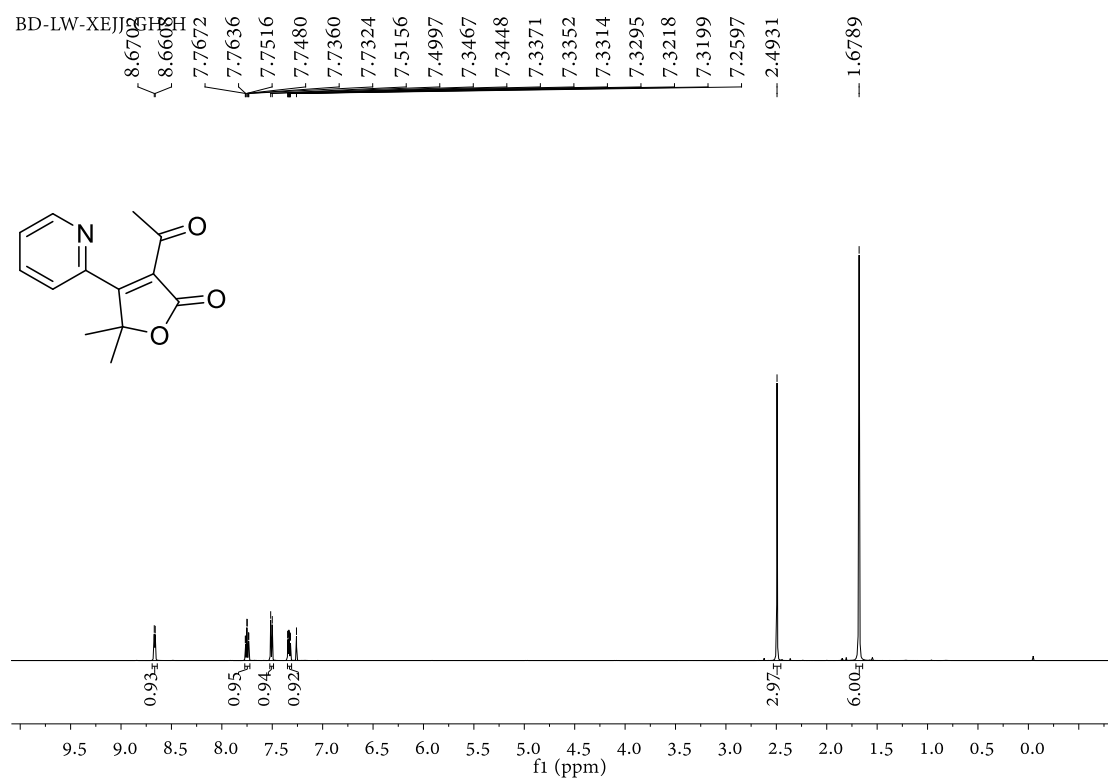

**Figure S9** <sup>1</sup>H NMR of compound **III-12** (500 MHz, CDCl<sub>3</sub>)

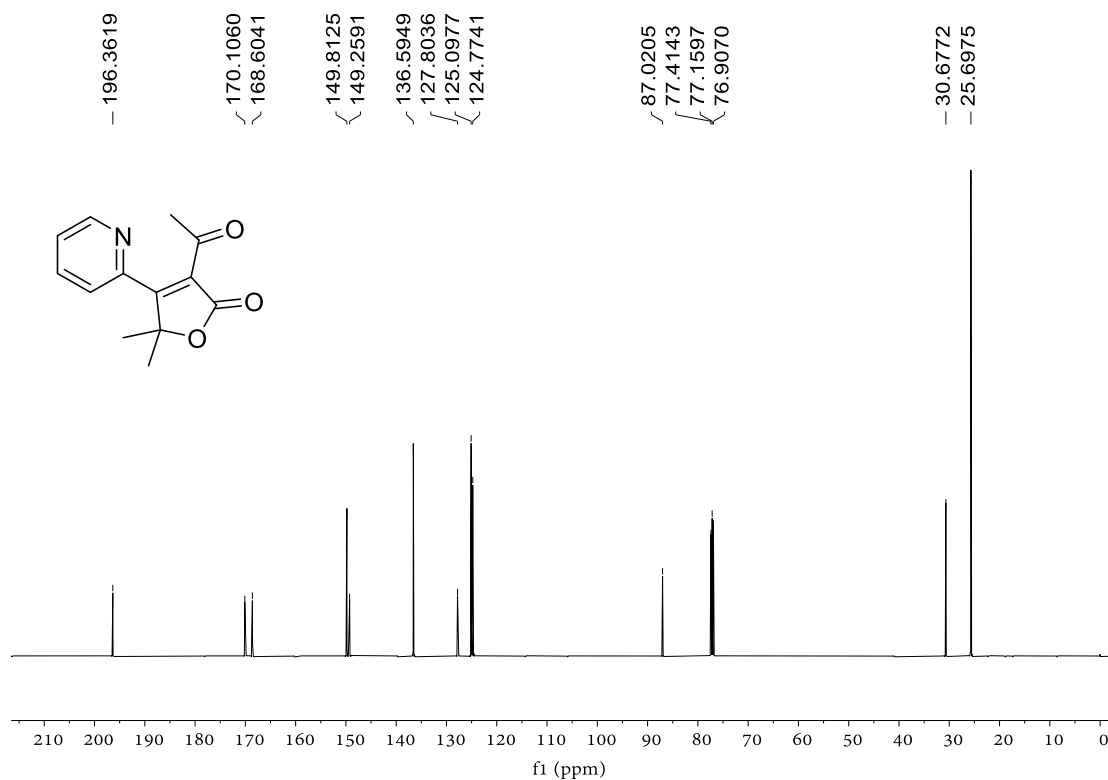

**Figure S10** <sup>13</sup>C NMR of compound **III-12** (126 MHz, CDCl<sub>3</sub>)

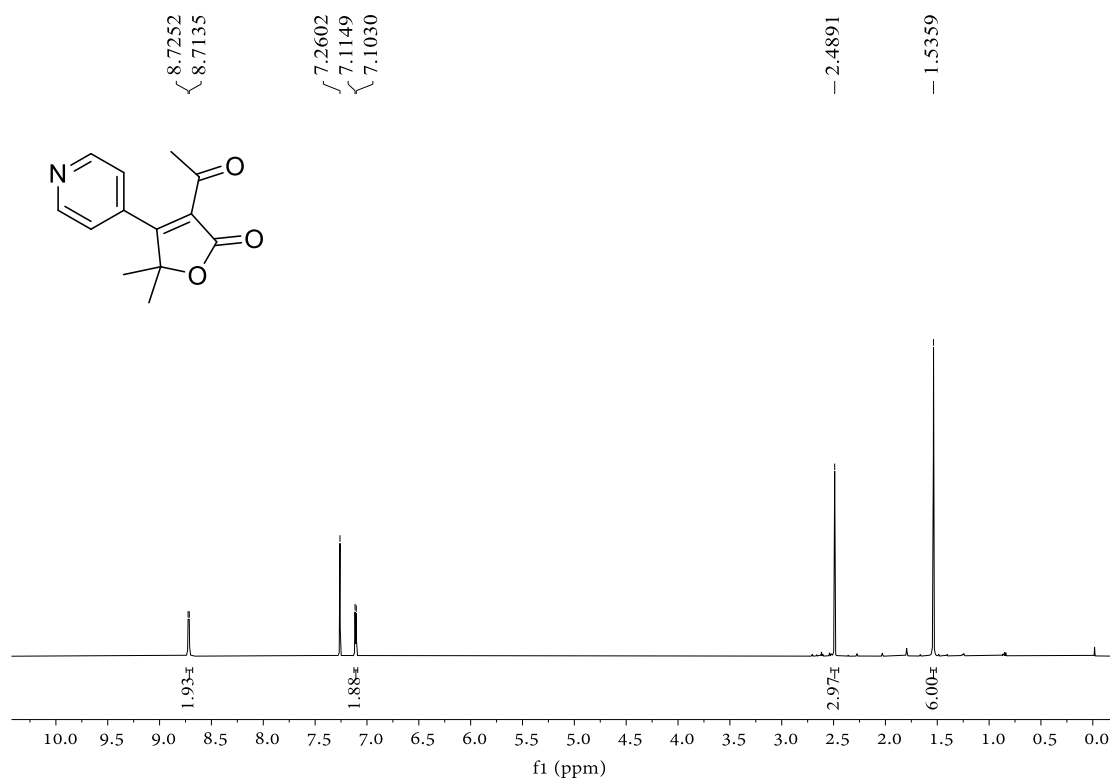

**Figure S11** <sup>1</sup>H NMR of compound **III-14** (500 MHz, CDCl<sub>3</sub>)

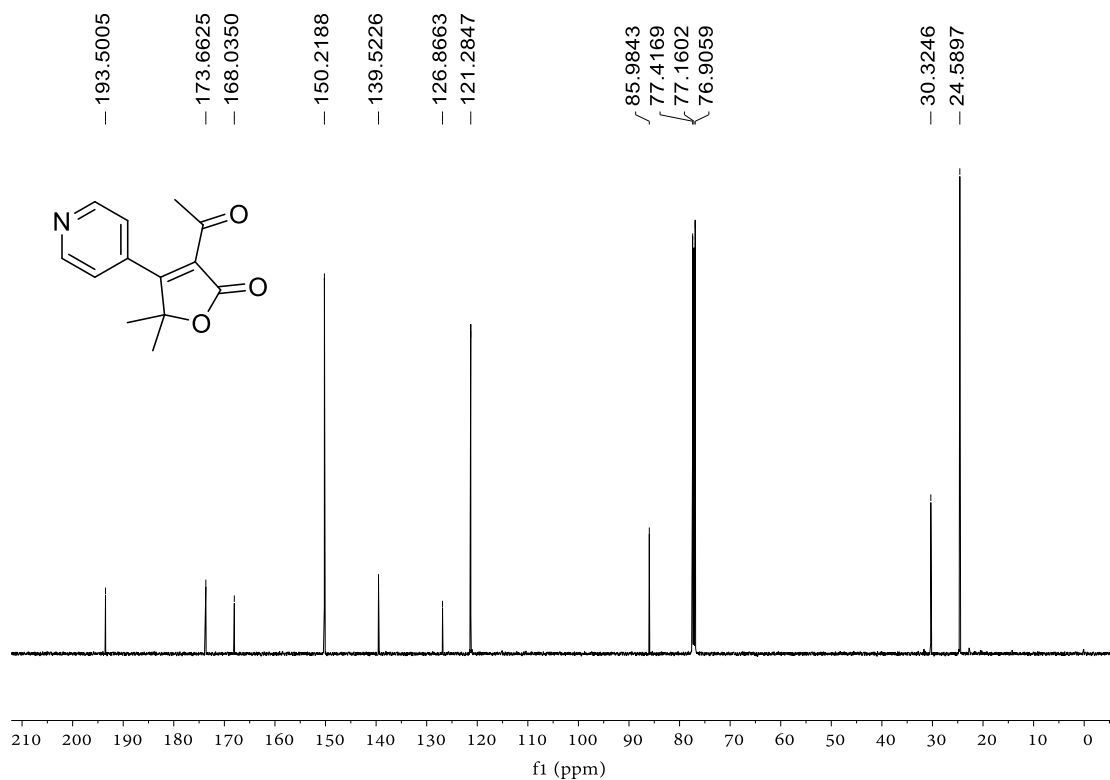

**Figure S12** <sup>13</sup>C NMR of compound **III-14** (126 MHz, CDCl<sub>3</sub>)

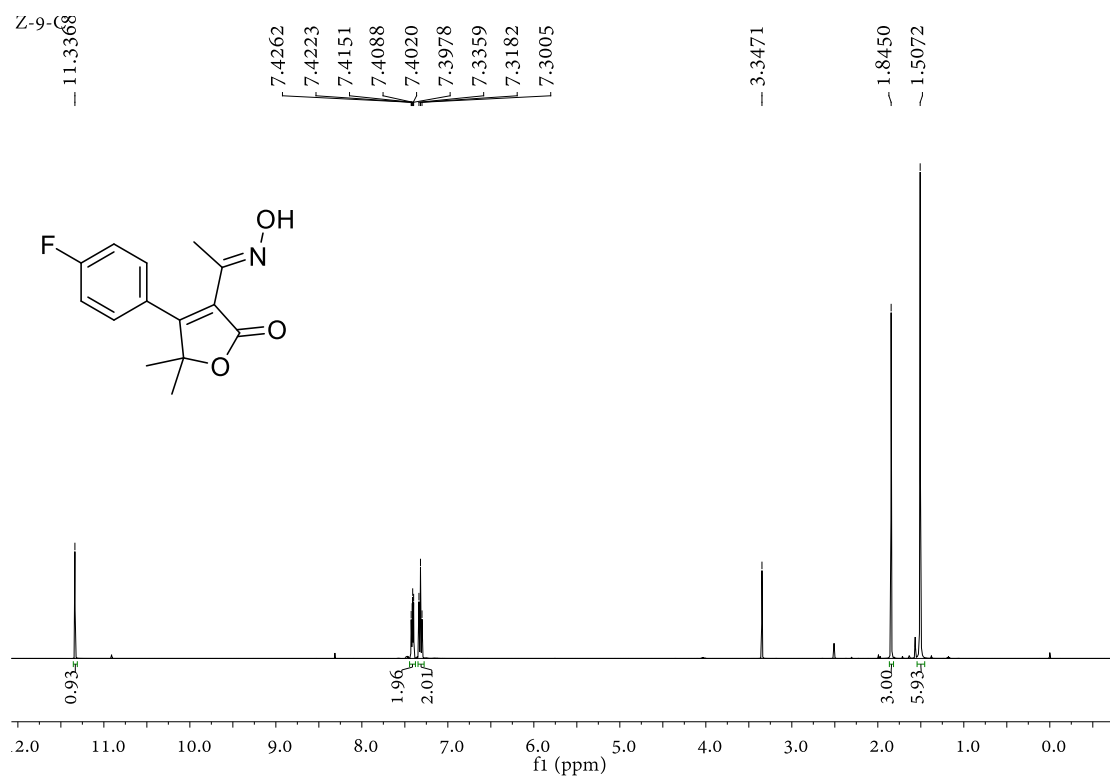

**Figure S13**  $^1\text{H}$  NMR of compound IV-7 (500 MHz,  $\text{CDCl}_3$ )

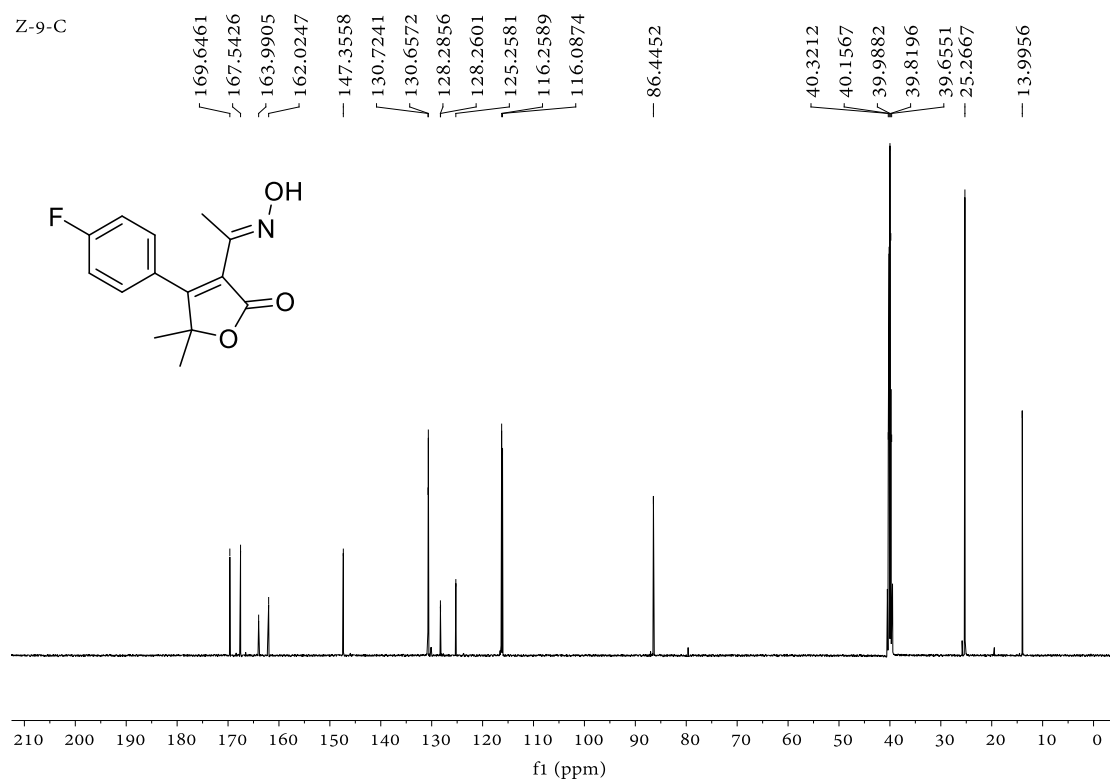

**Figure S14**  $^{13}\text{C}$  NMR of compound IV-7 (126 MHz,  $\text{CDCl}_3$ )



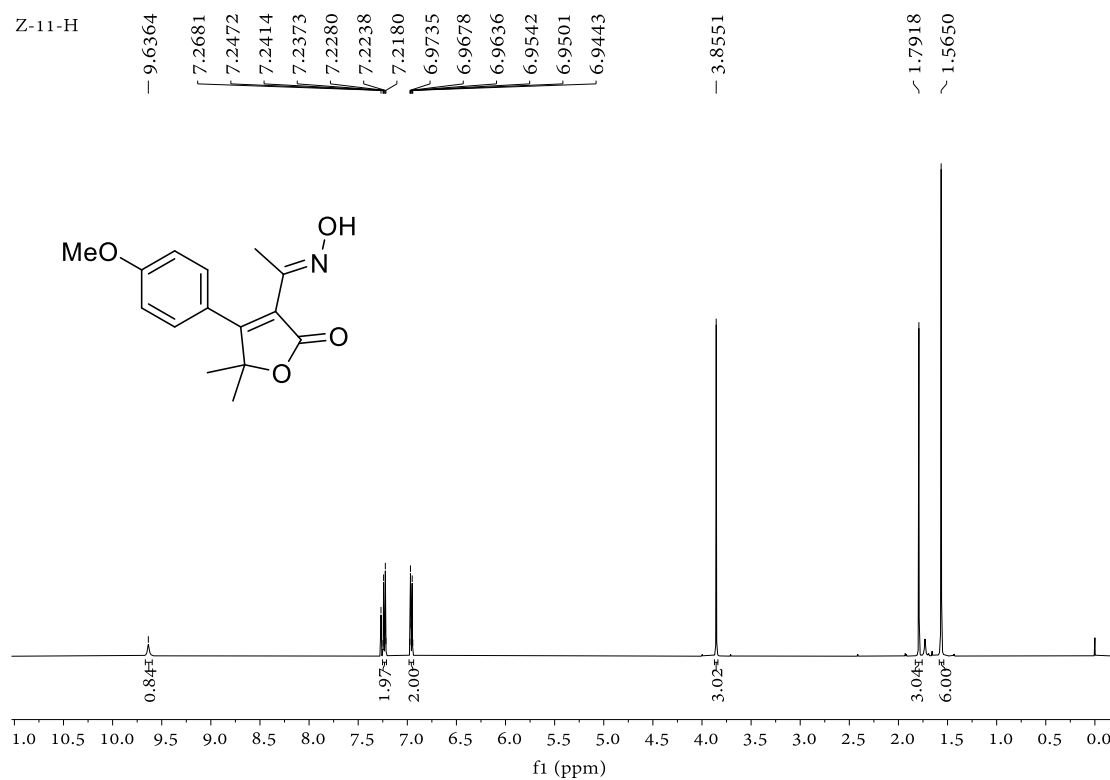

**Figure S15** <sup>1</sup>H NMR of compound IV-8 (500 MHz, CDCl<sub>3</sub>)

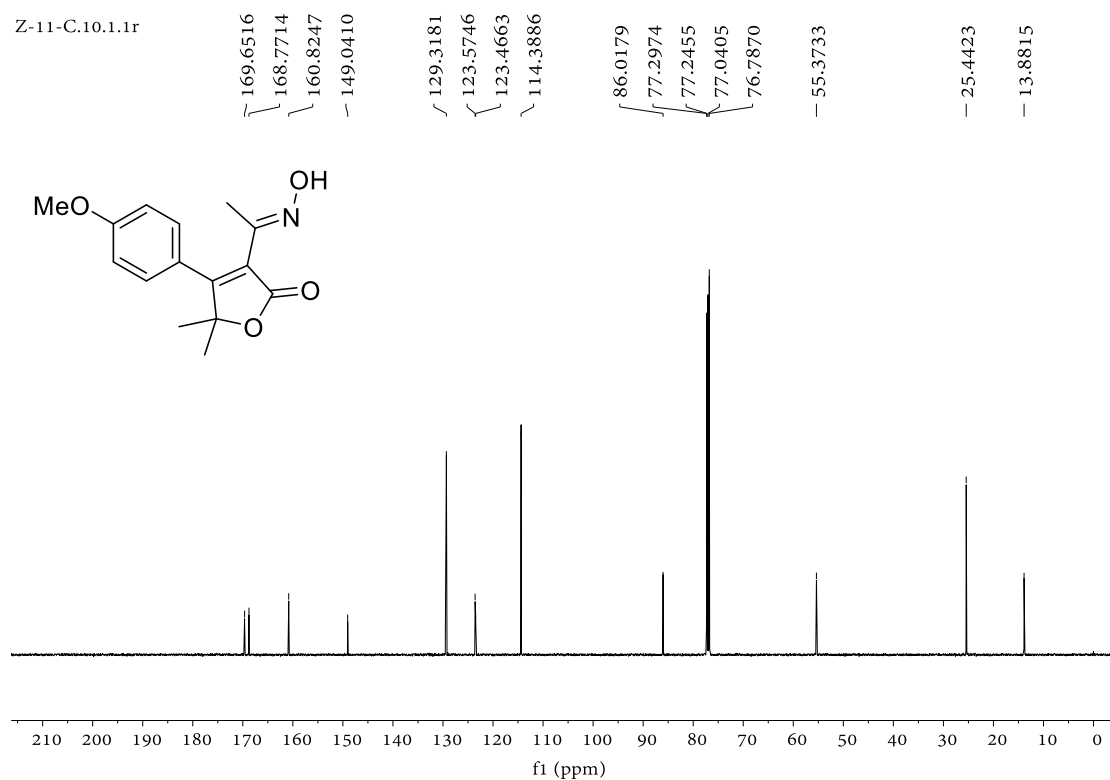

**Figure S16** <sup>13</sup>C NMR of compound IV-8 (126 MHz, CDCl<sub>3</sub>)

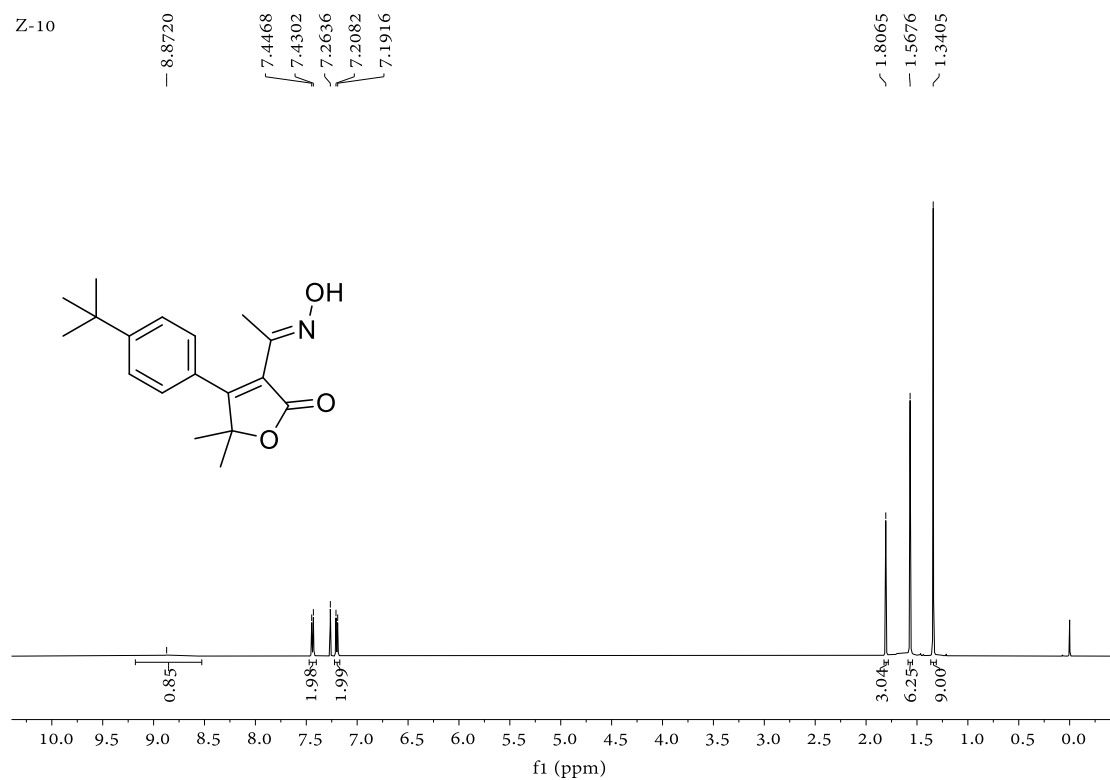

**Figure S17** <sup>1</sup>H NMR of compound IV-9 (500 MHz, CDCl<sub>3</sub>)

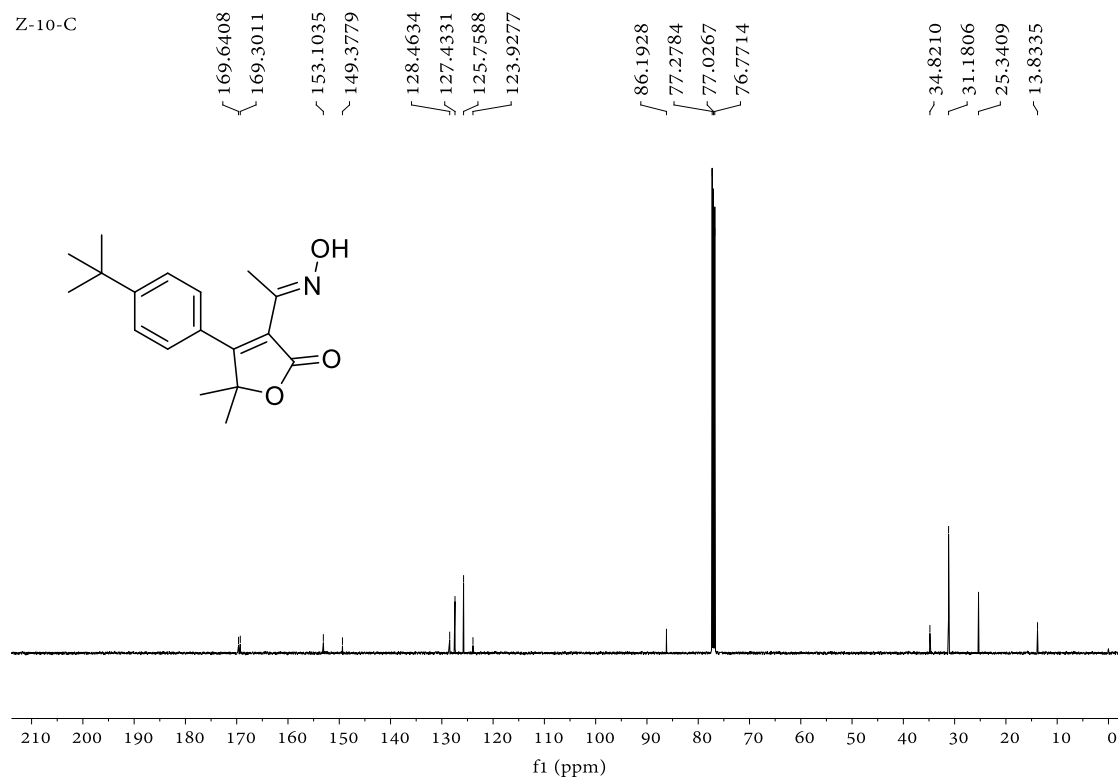

**Figure S18** <sup>13</sup>C NMR of compound IV-9 (126 MHz, CDCl<sub>3</sub>)

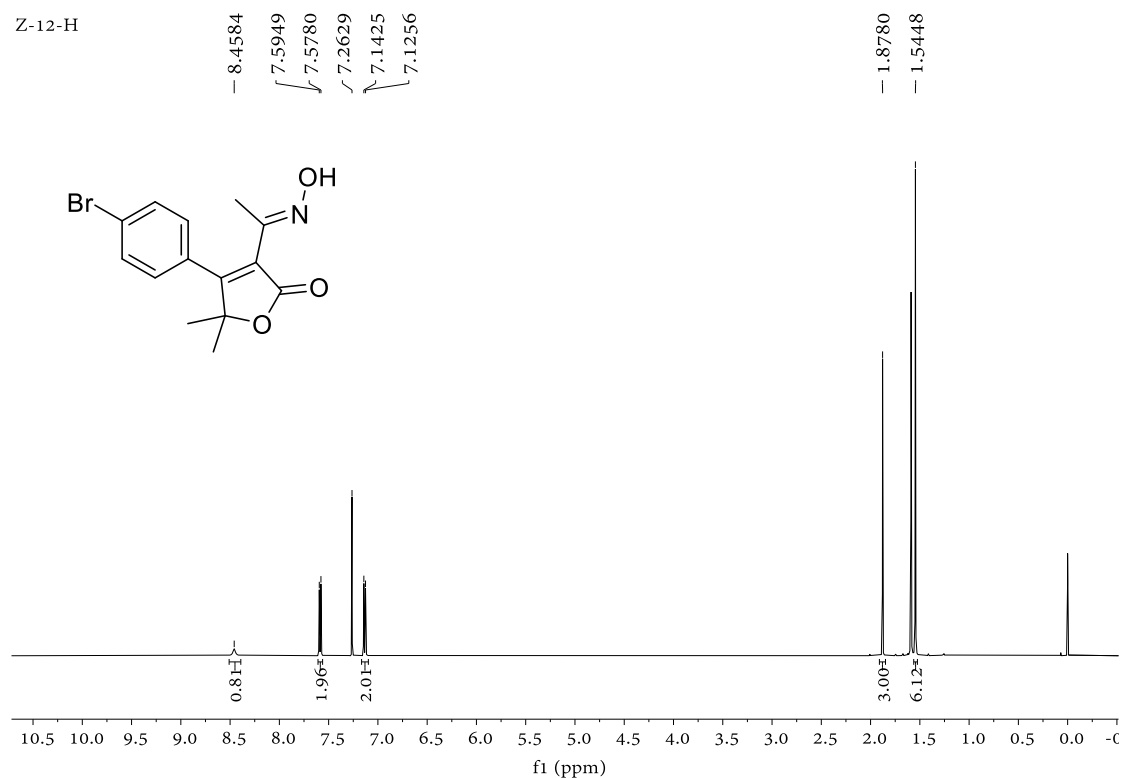

**Figure S19**  $^1\text{H}$  NMR of compound IV-10 (500 MHz,  $\text{CDCl}_3$ )

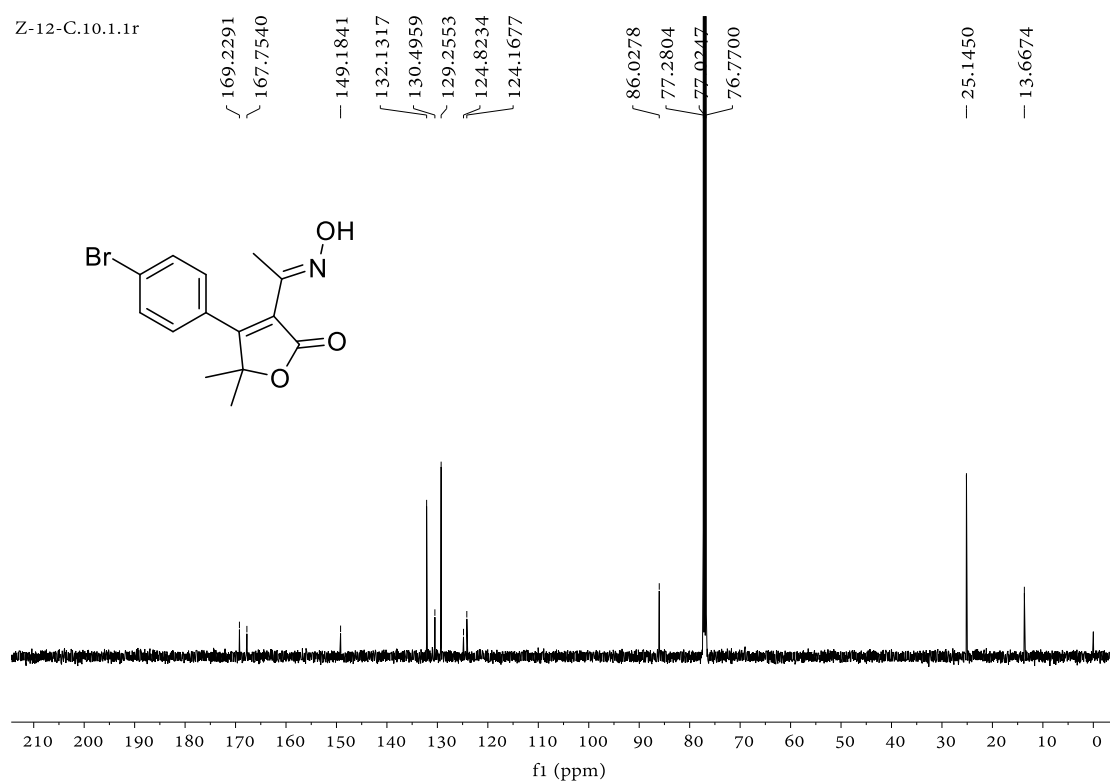

**Figure S20**  $^{13}\text{C}$  NMR of compound IV-10 (126 MHz,  $\text{CDCl}_3$ )

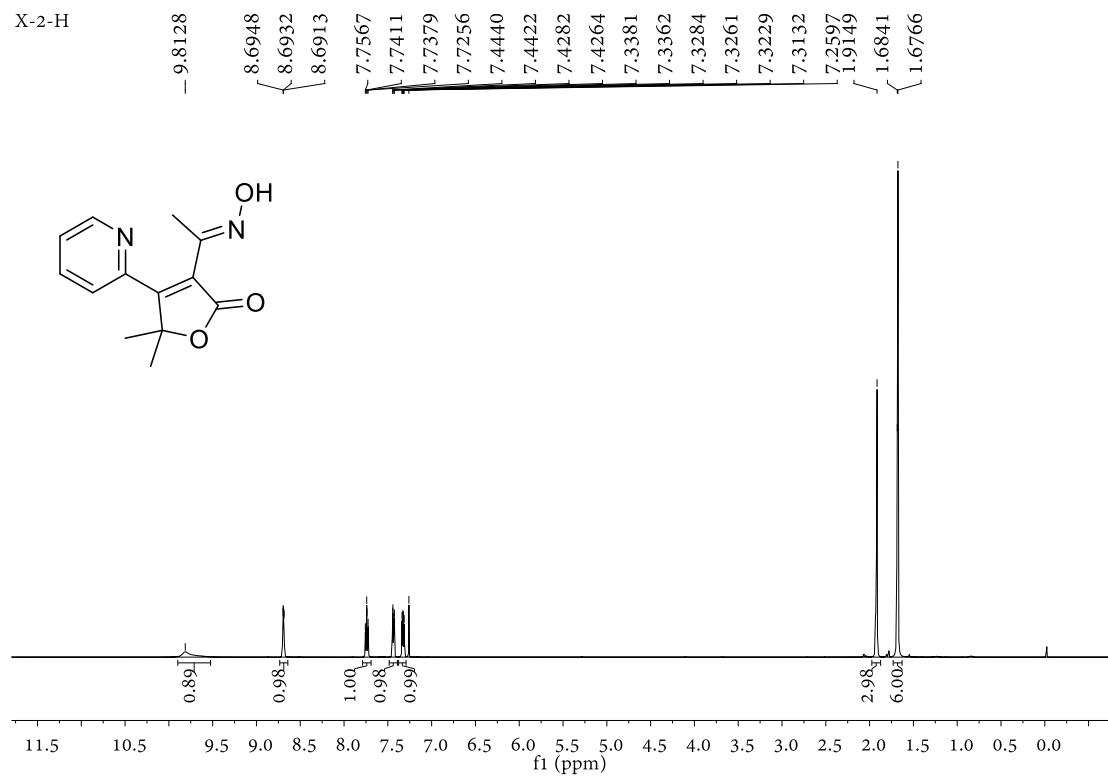

**Figure S21** <sup>1</sup>H NMR of compound IV-12 (500 MHz, CDCl<sub>3</sub>)

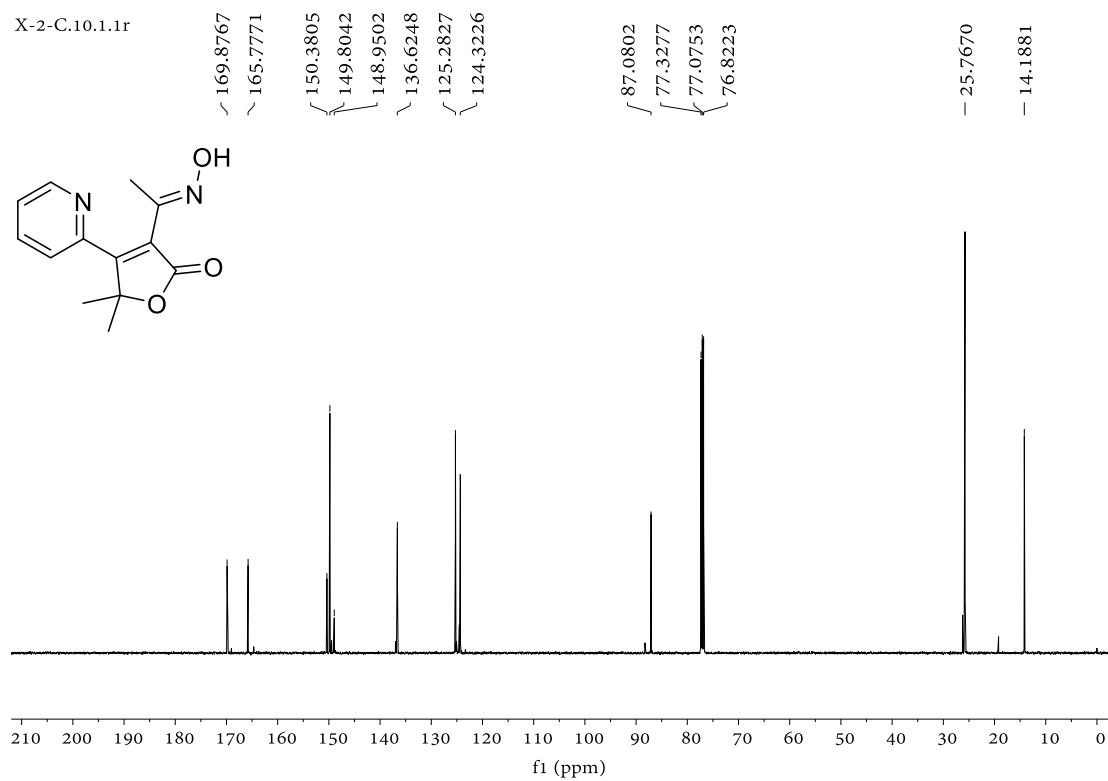

**Figure S22** <sup>13</sup>C NMR of compound IV-12 (126 MHz, CDCl<sub>3</sub>)

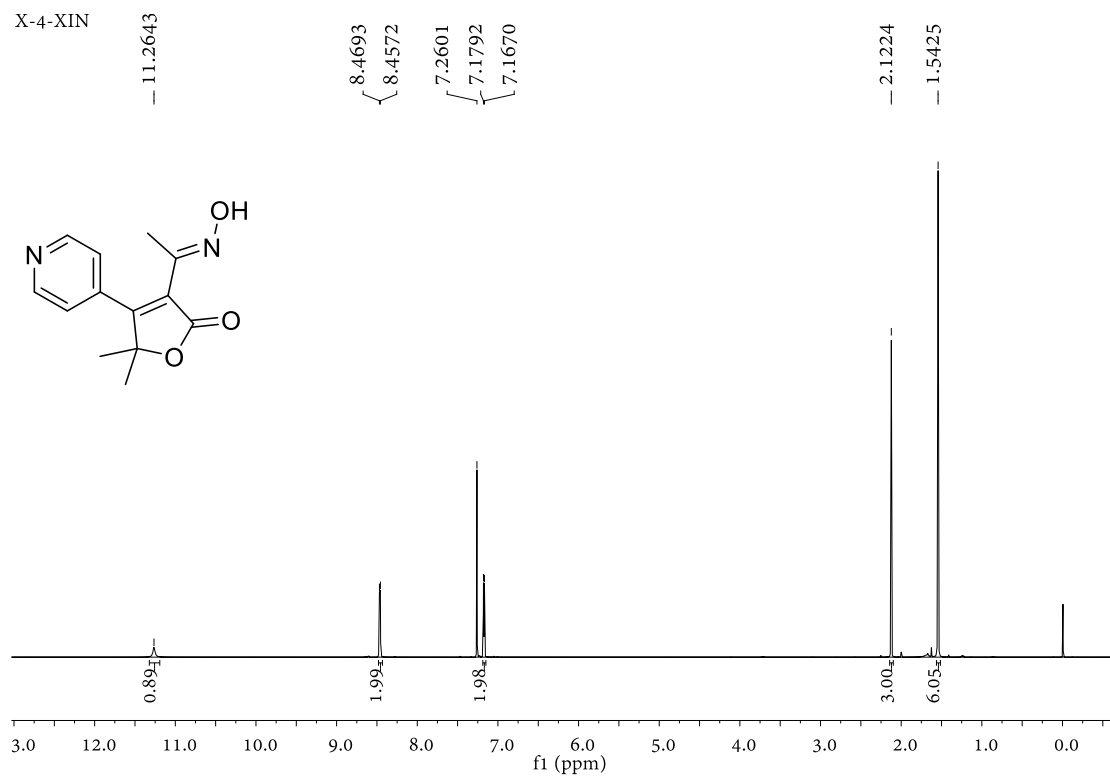

**Figure S23**  $^1\text{H}$  NMR of compound IV-14 (500 MHz,  $\text{CDCl}_3$ )

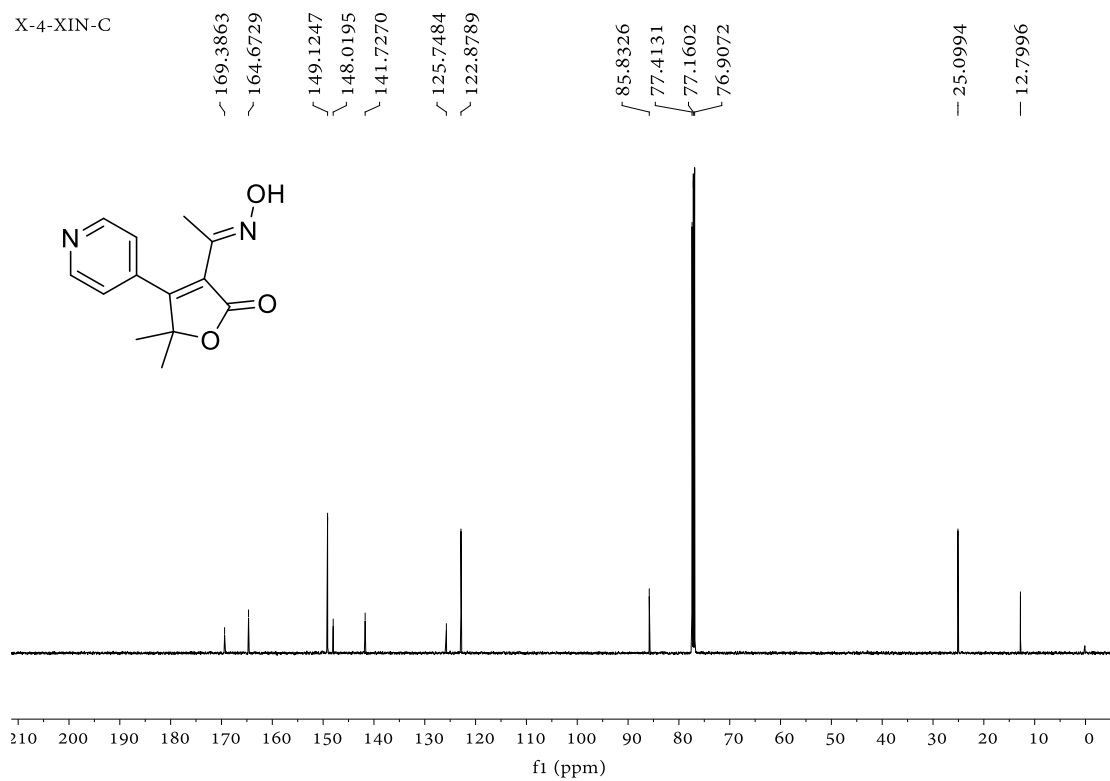

**Figure S24**  $^{13}\text{C}$  NMR of compound IV-14 (126 MHz,  $\text{CDCl}_3$ )

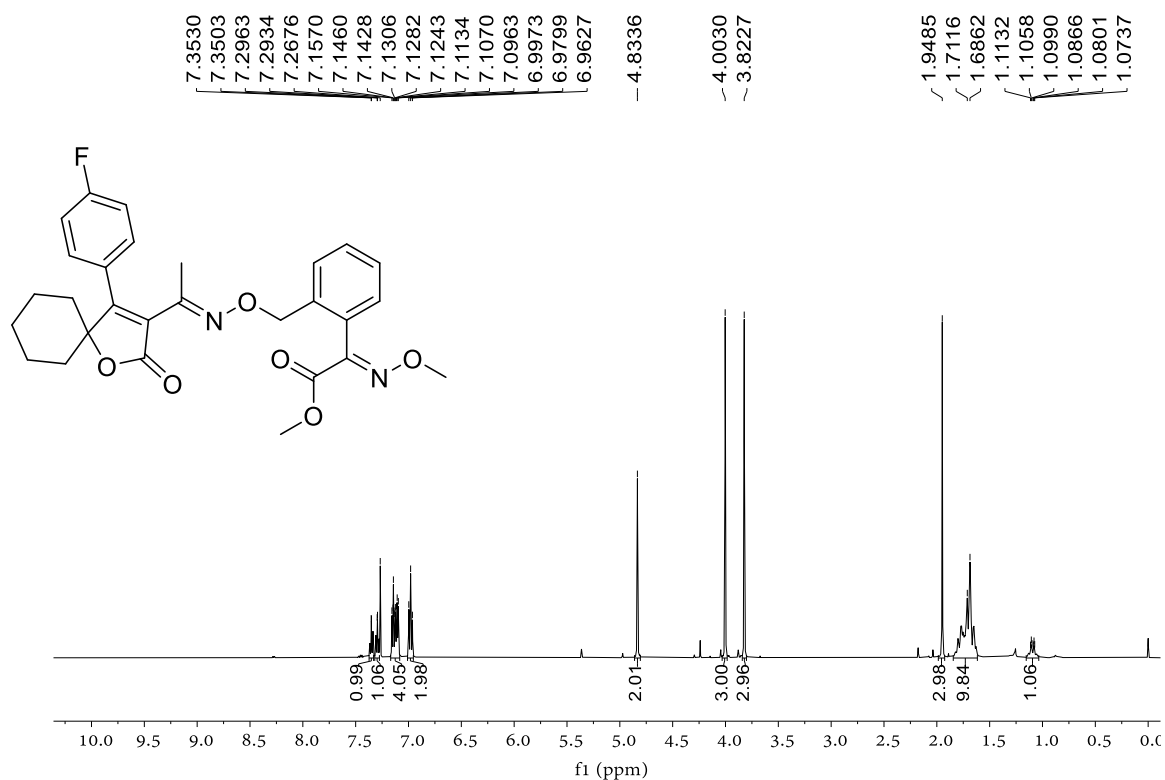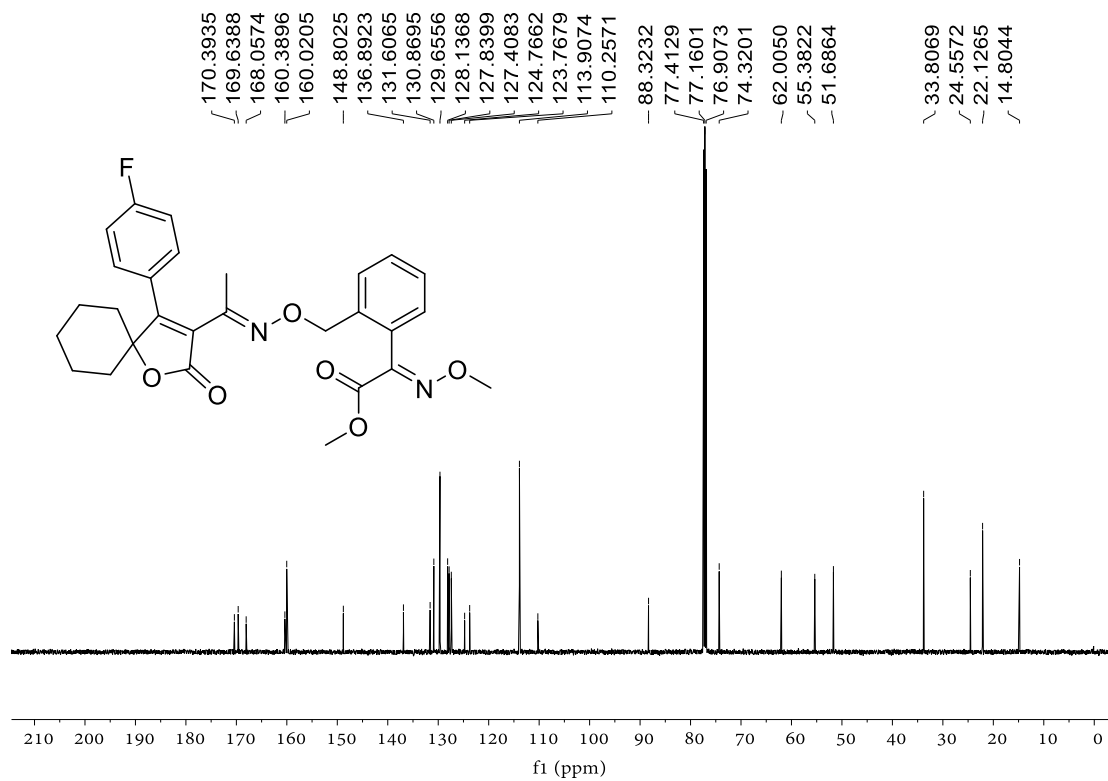

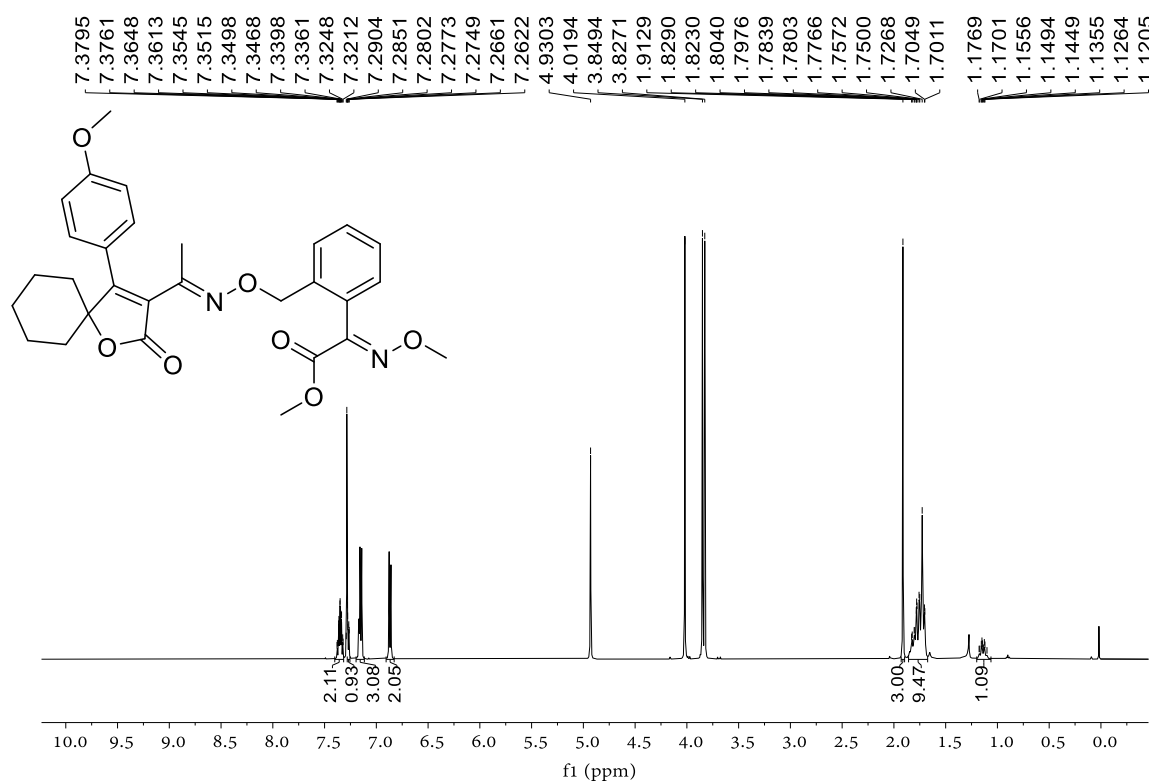

**Figure S27** <sup>1</sup>H NMR of compound V-2 (500 MHz, CDCl<sub>3</sub>)

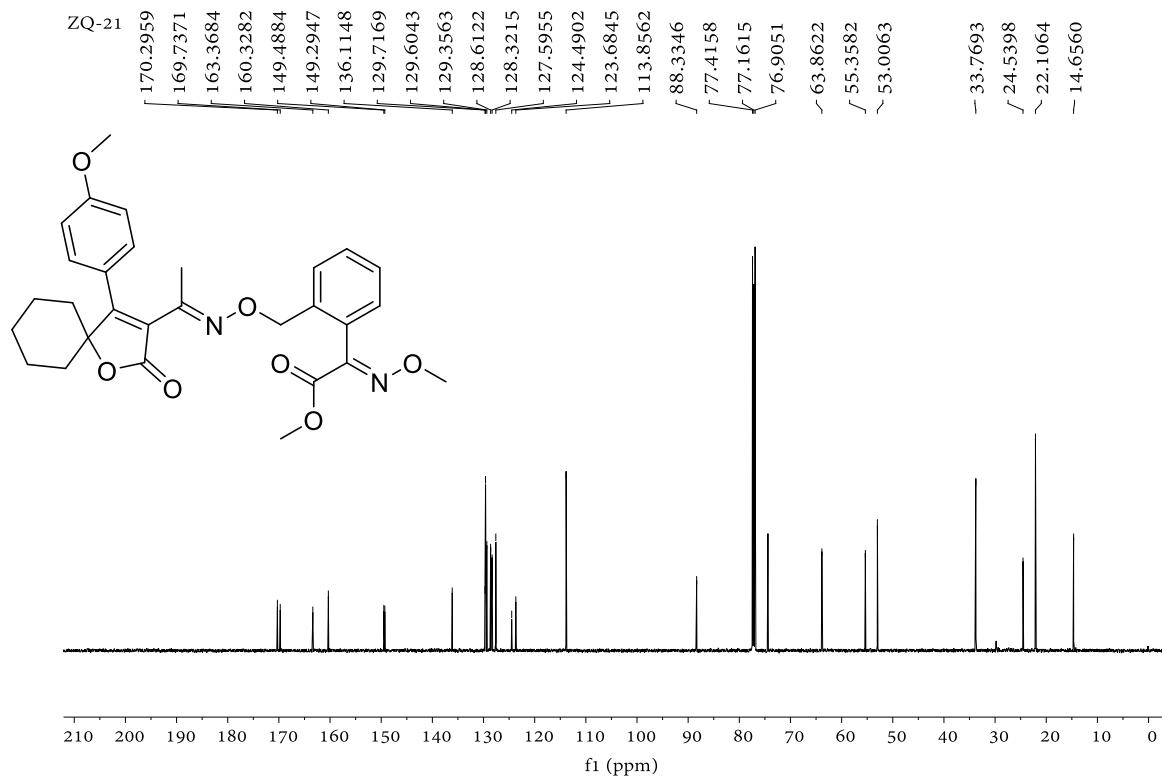

**Figure S28** <sup>13</sup>C NMR of compound V-2 (126 MHz, CDCl<sub>3</sub>)

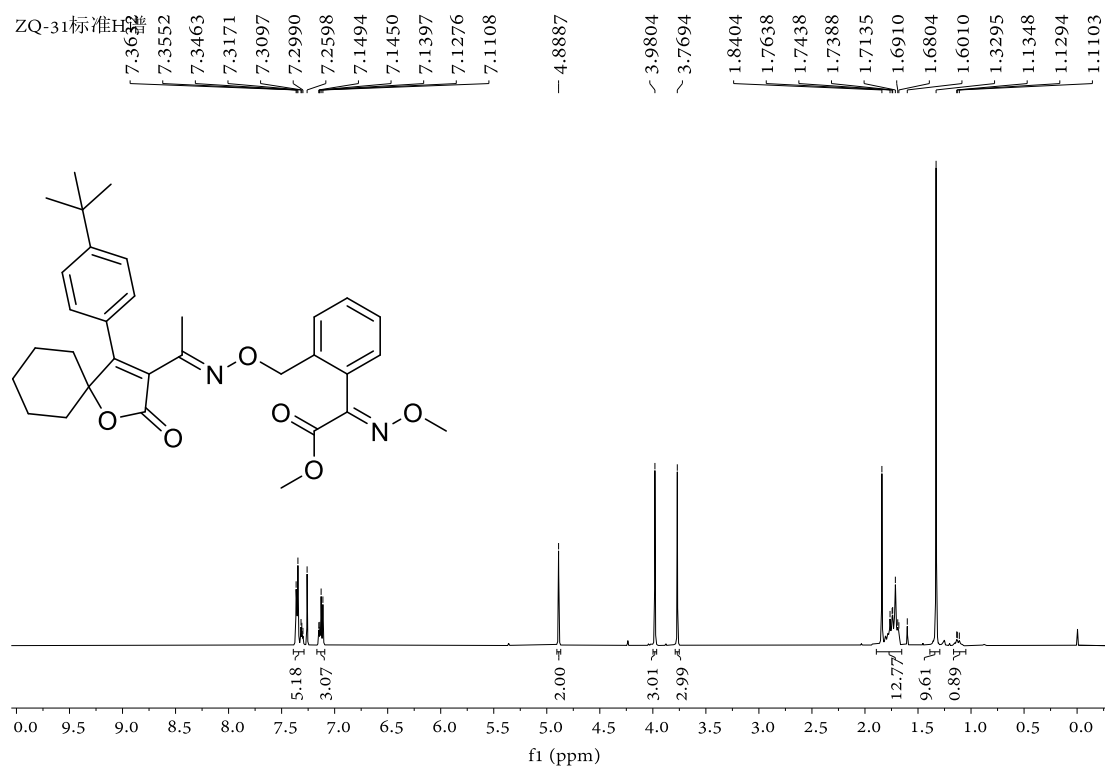

**Figure S29**  $^1\text{H}$  NMR of compound V-3 (500 MHz,  $\text{CDCl}_3$ )

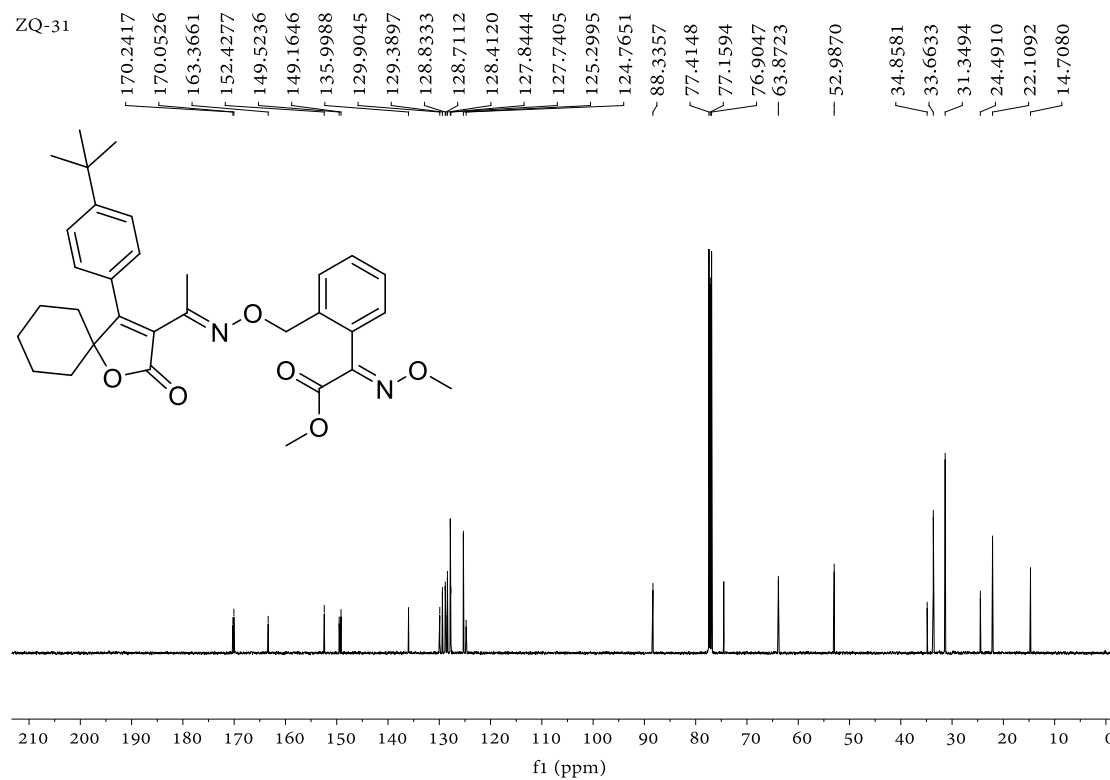

**Figure S30**  $^{13}\text{C}$  NMR of compound V-3 (126 MHz,  $\text{CDCl}_3$ )



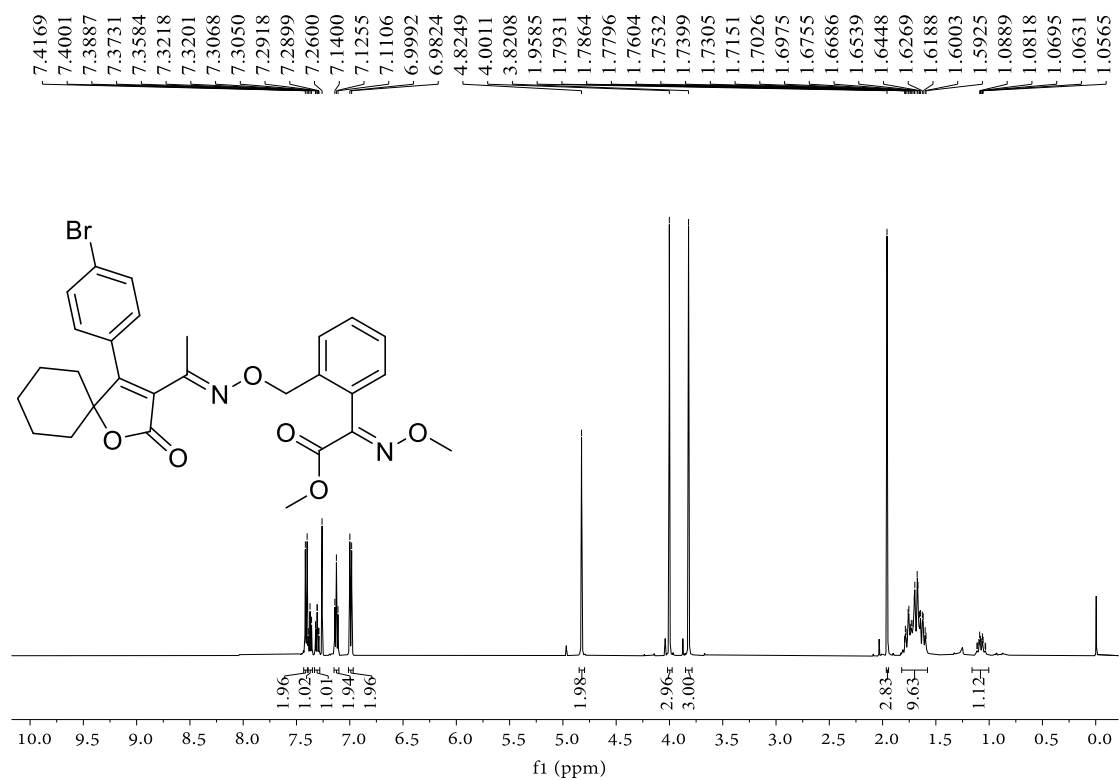

**Figure S31** <sup>1</sup>H NMR of compound V-4 (500 MHz, CDCl<sub>3</sub>)

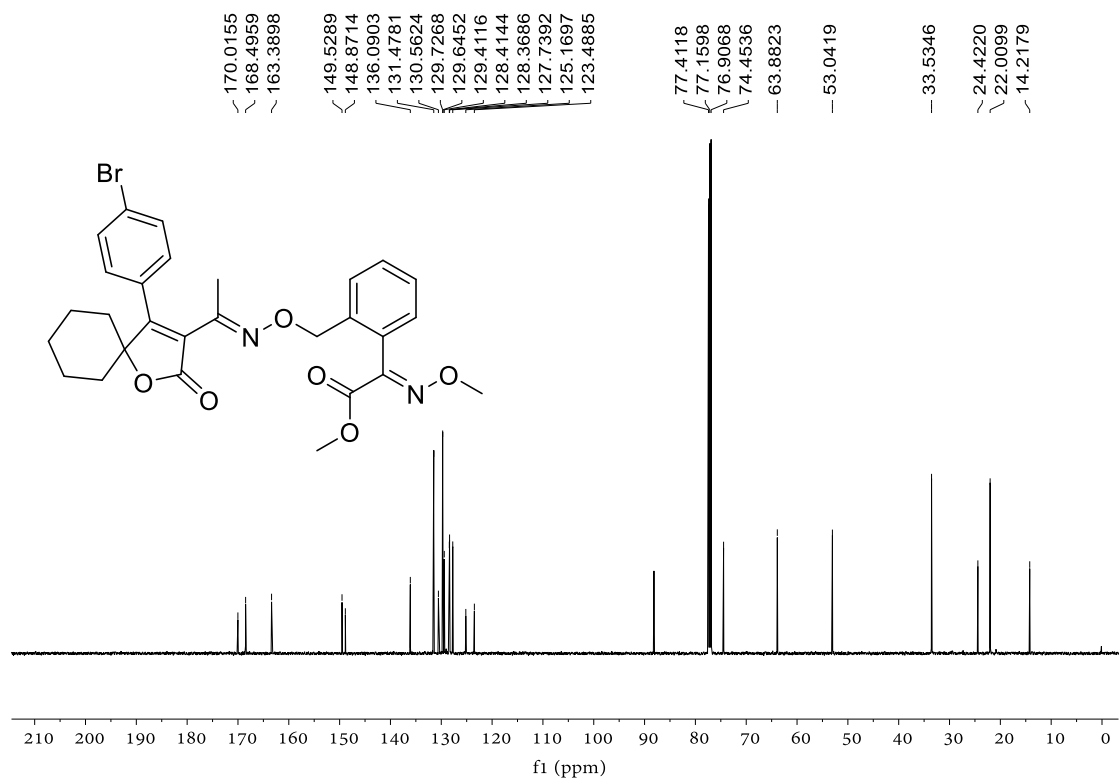

**Figure S32** <sup>13</sup>C NMR of compound V-4 (126 MHz, CDCl<sub>3</sub>)



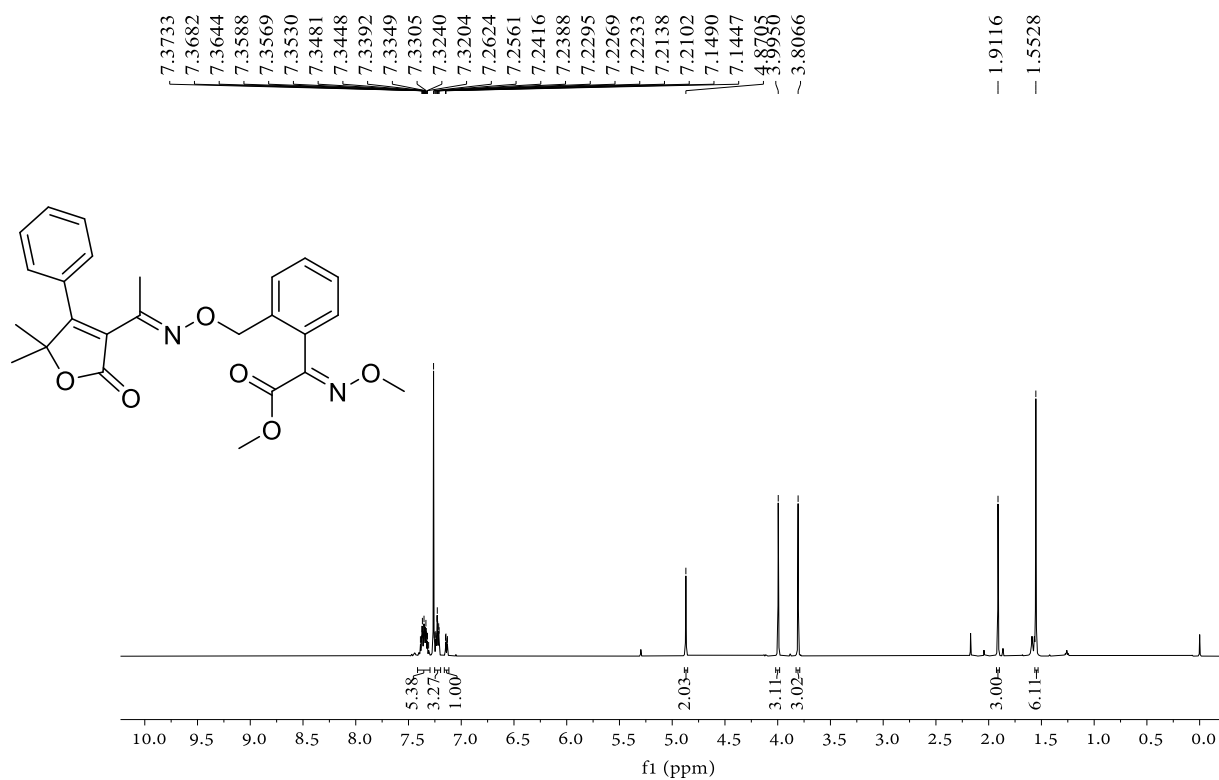

**Figure S35** <sup>1</sup>H NMR of compound V-6 (500 MHz, CDCl<sub>3</sub>)

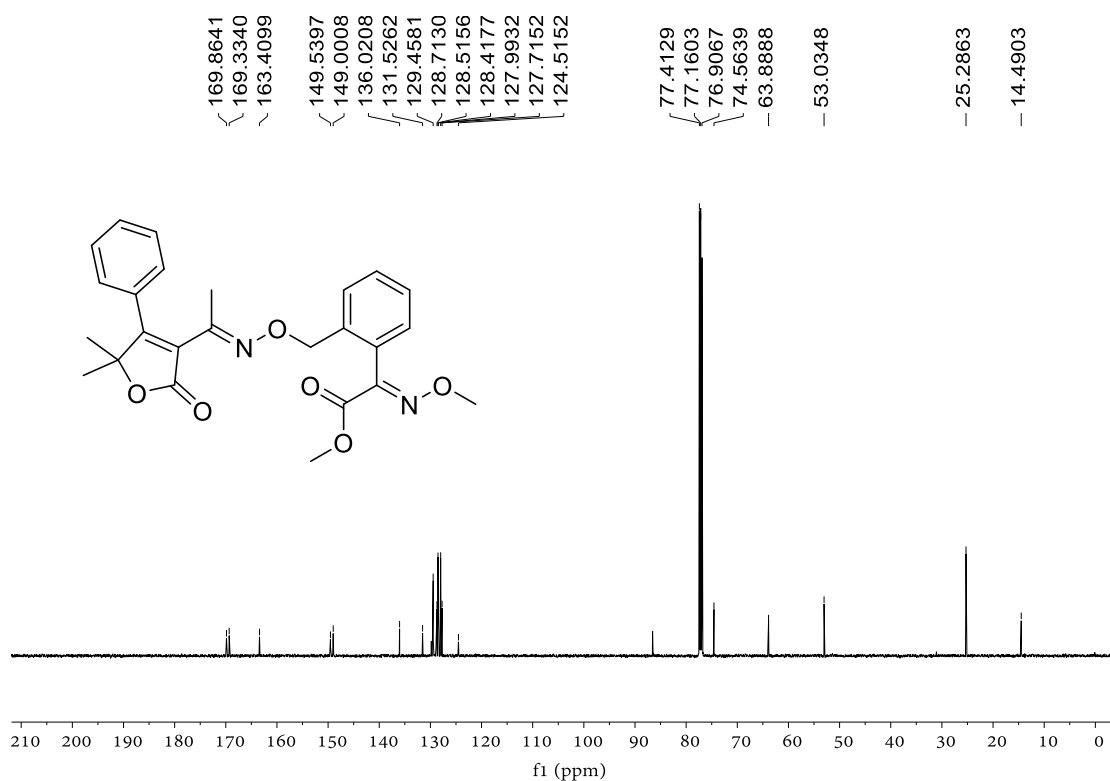

**Figure S36** <sup>13</sup>C NMR of compound V-6 (126 MHz, CDCl<sub>3</sub>)

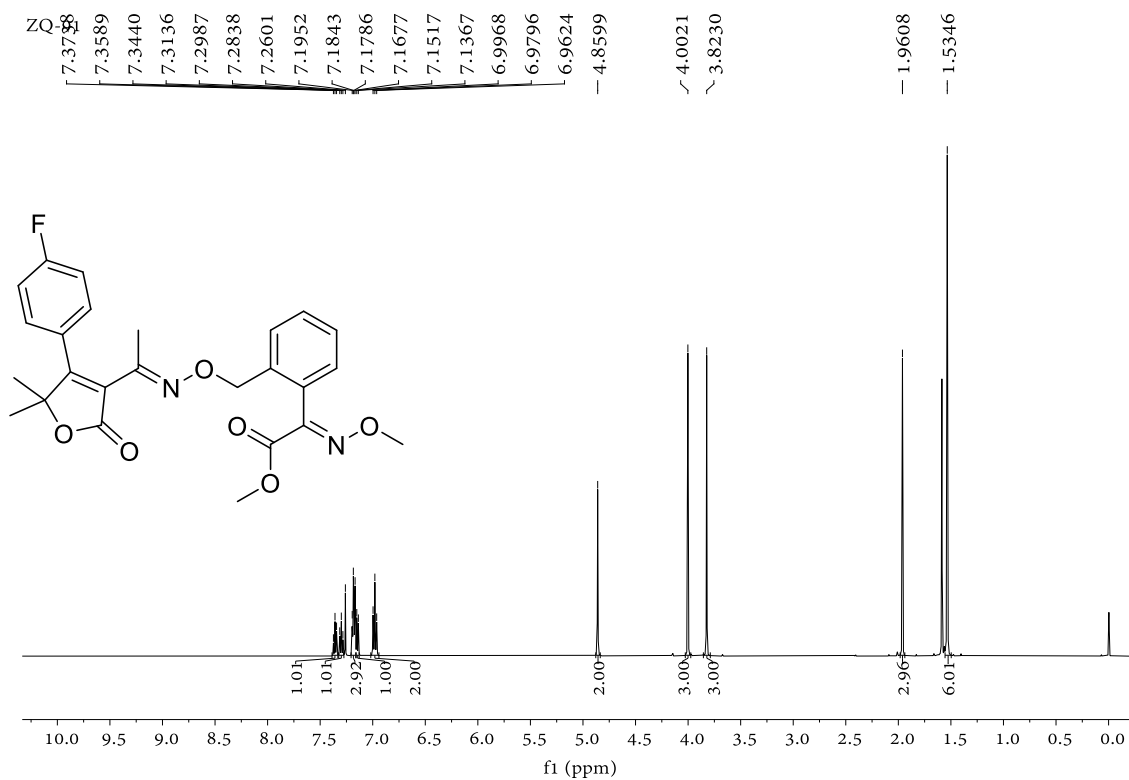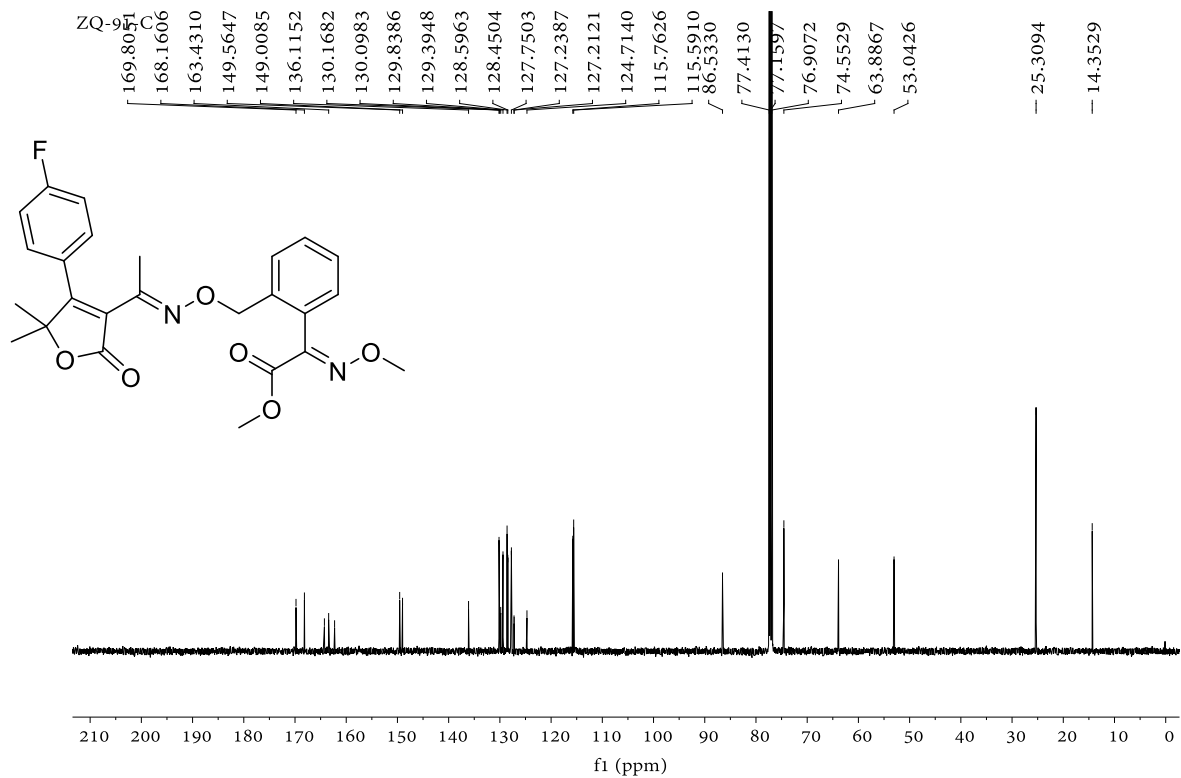

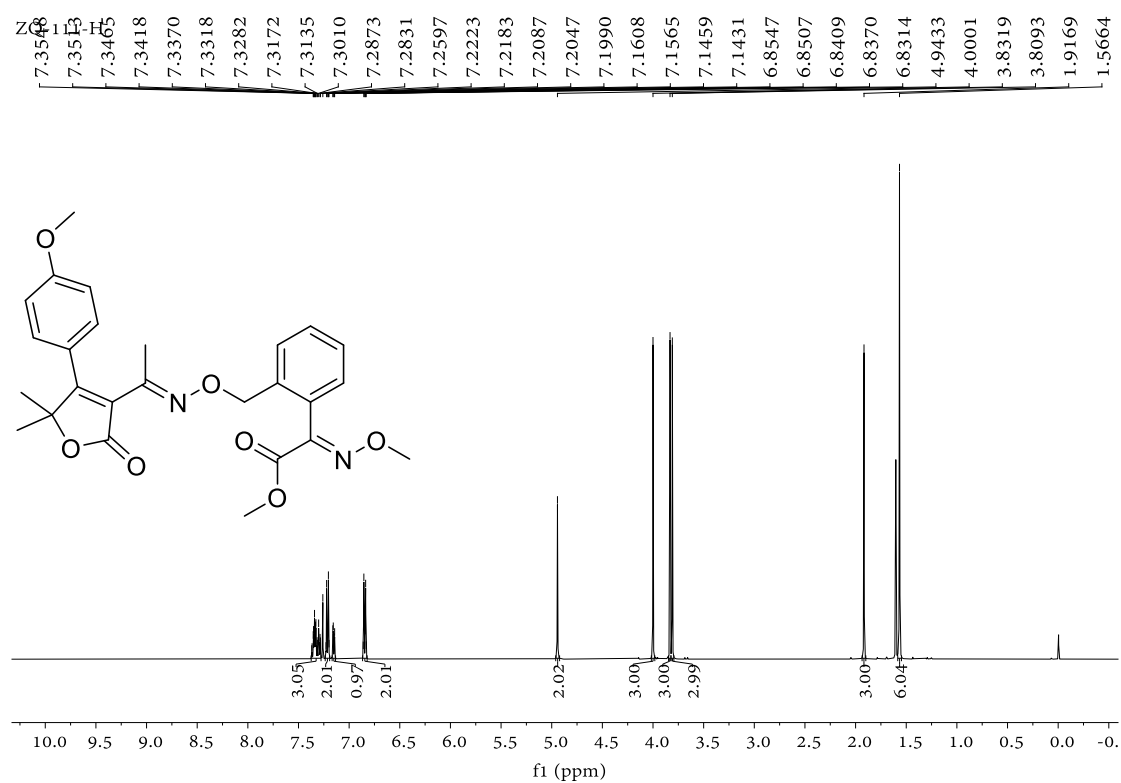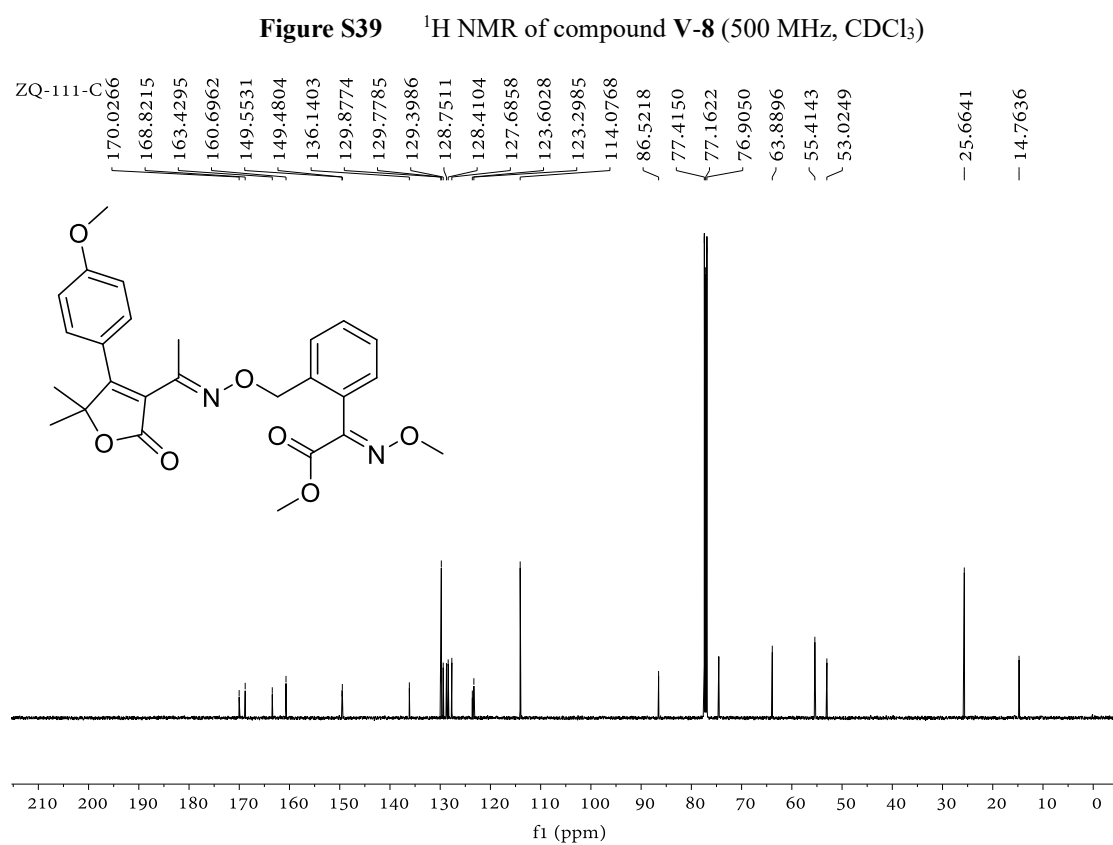

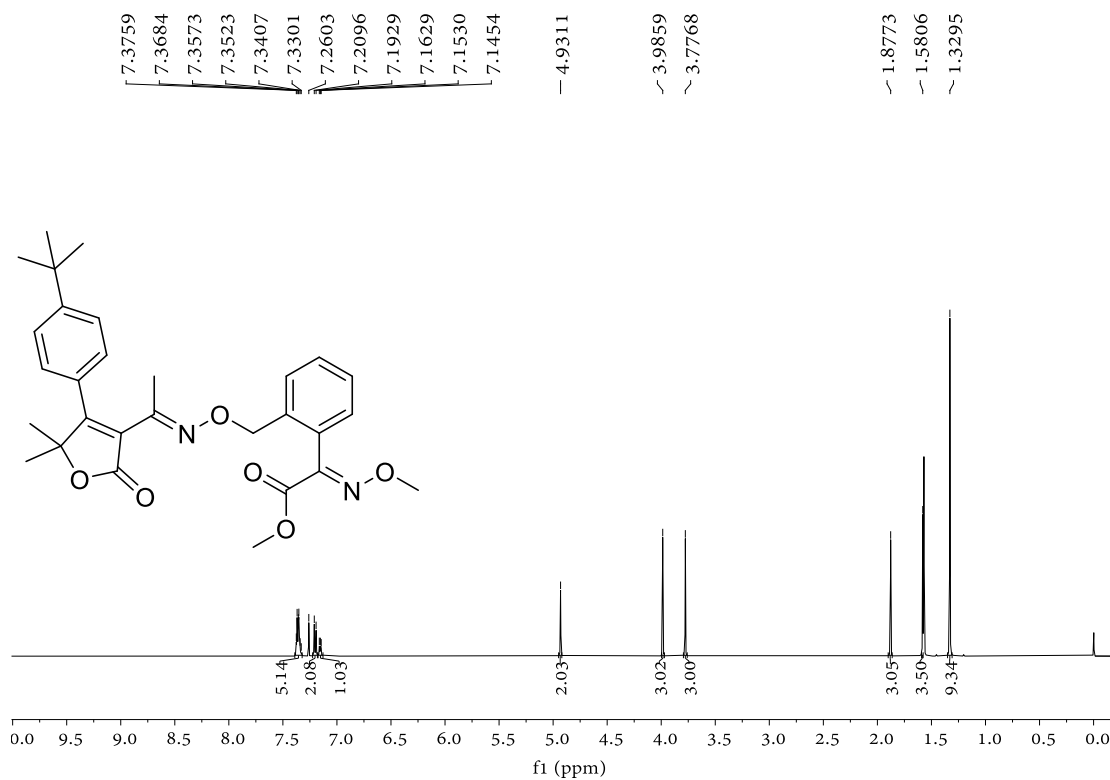

**Figure S41** <sup>1</sup>H NMR of compound V-9 (500 MHz, CDCl<sub>3</sub>)

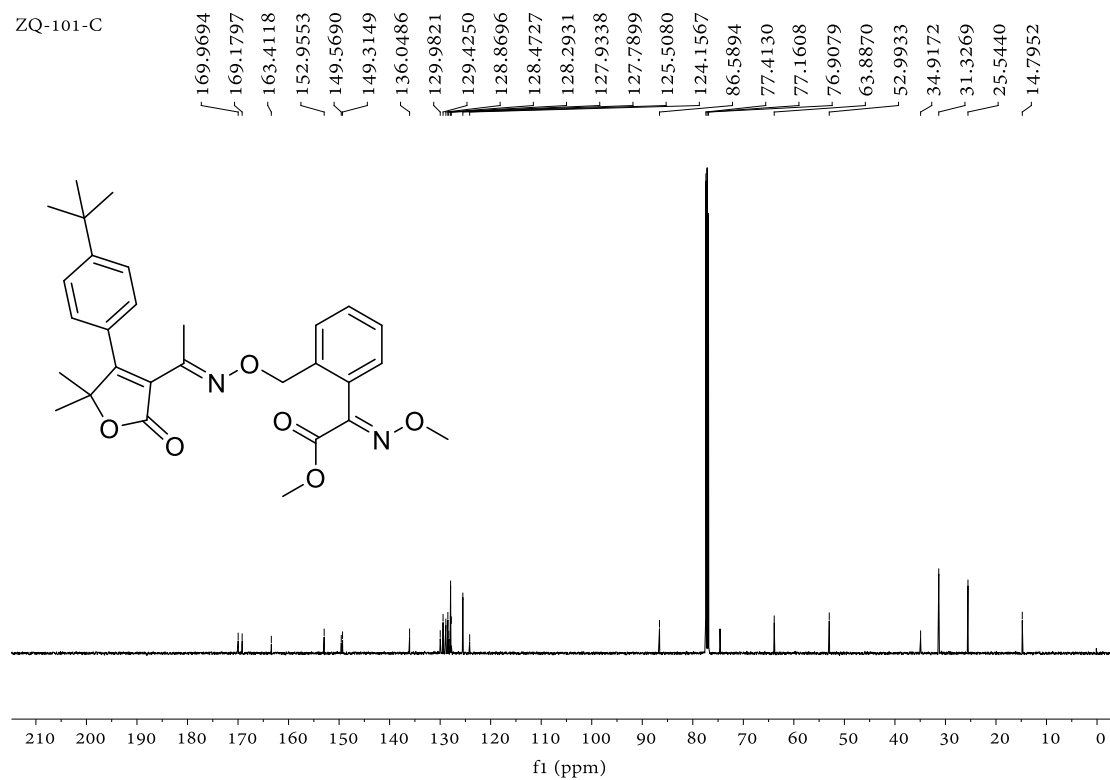

**Figure S42** <sup>13</sup>C NMR of compound V-9 (126 MHz, CDCl<sub>3</sub>)

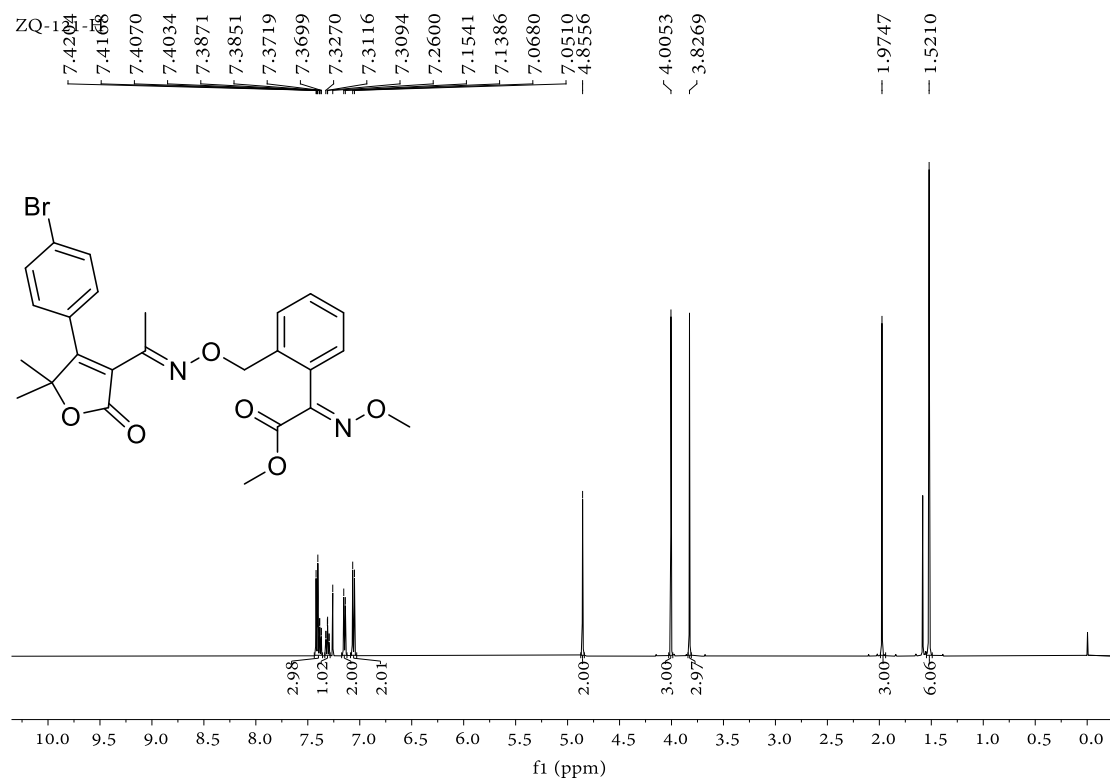

**Figure S43**  $^1\text{H}$  NMR of compound V-10 (500 MHz,  $\text{CDCl}_3$ )

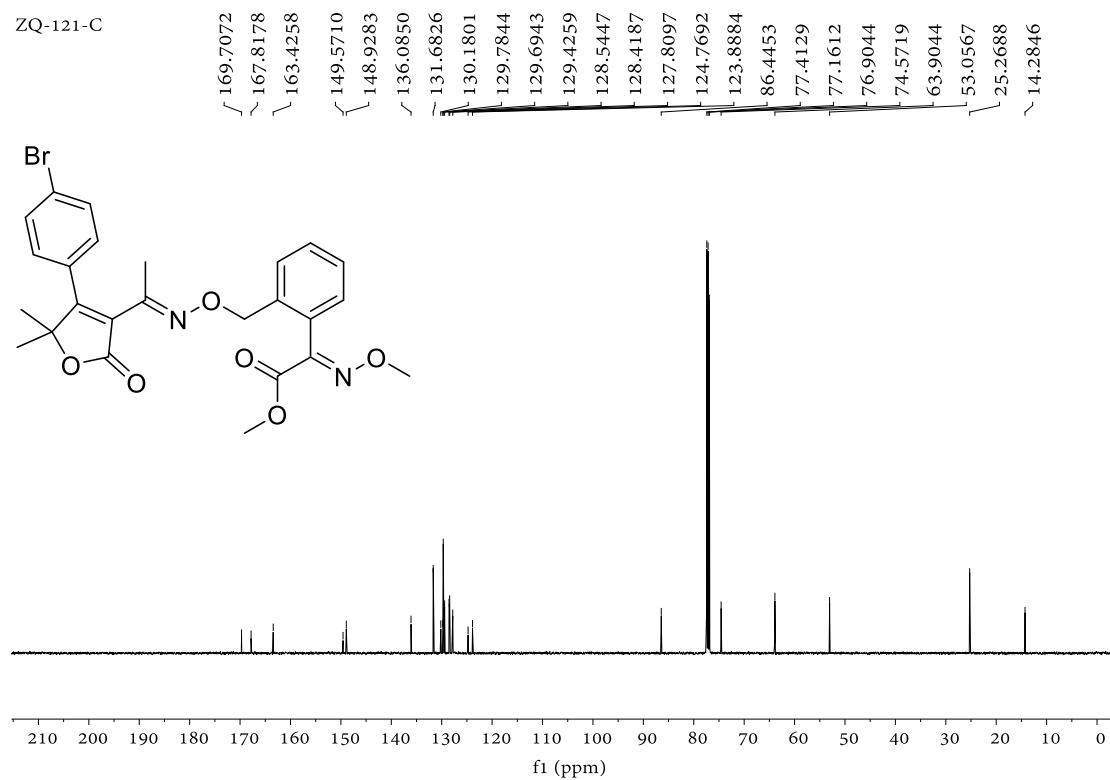

**Figure S44**  $^{13}\text{C}$  NMR of compound V-10 (126 MHz,  $\text{CDCl}_3$ )

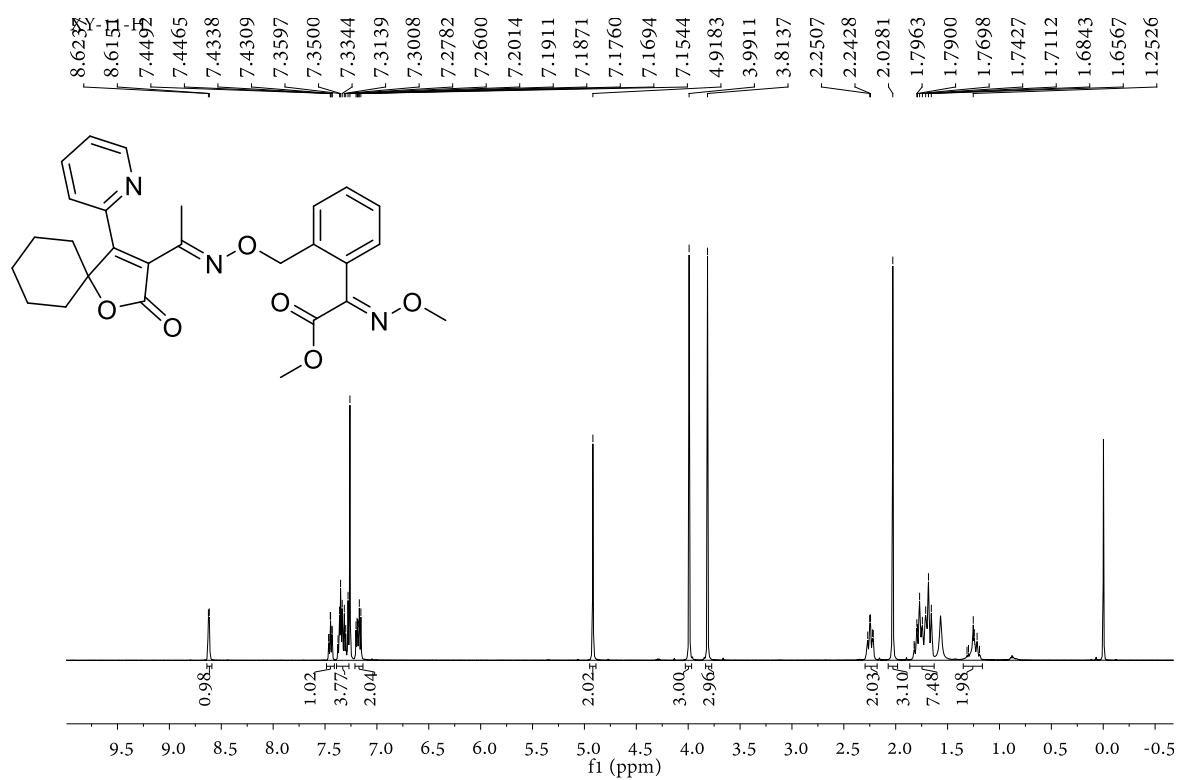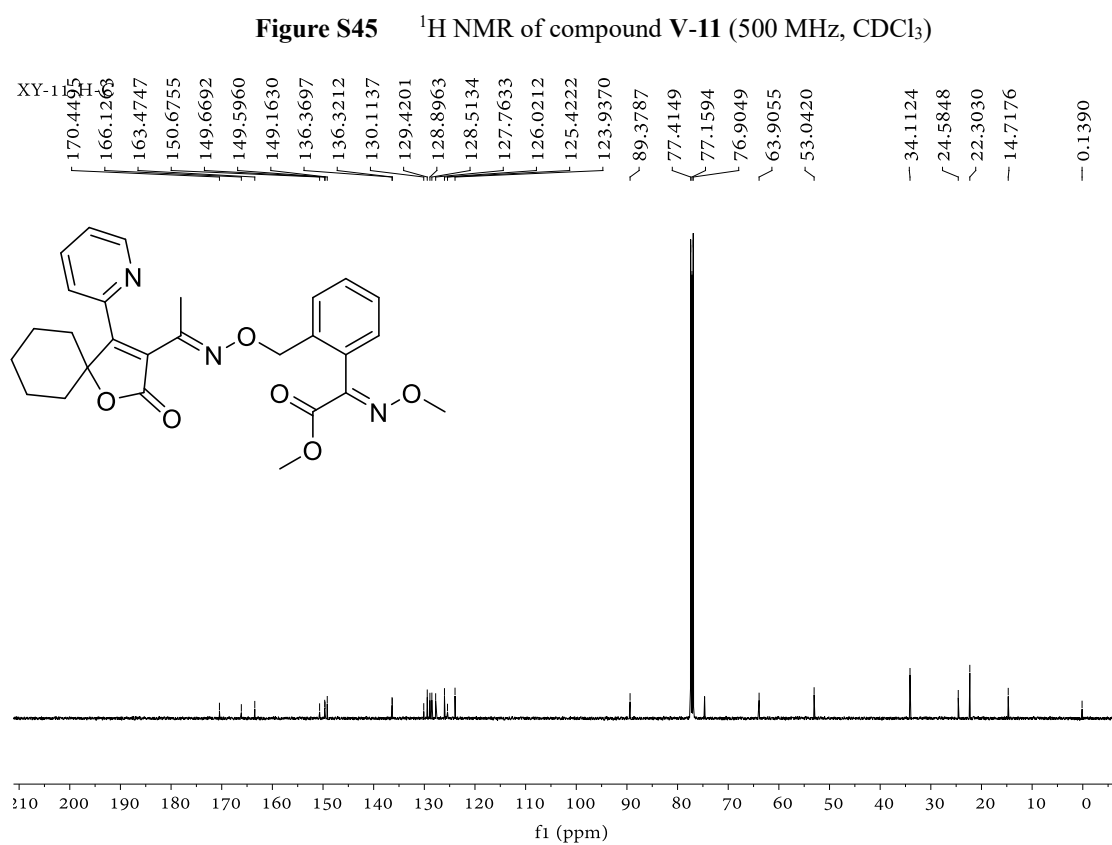





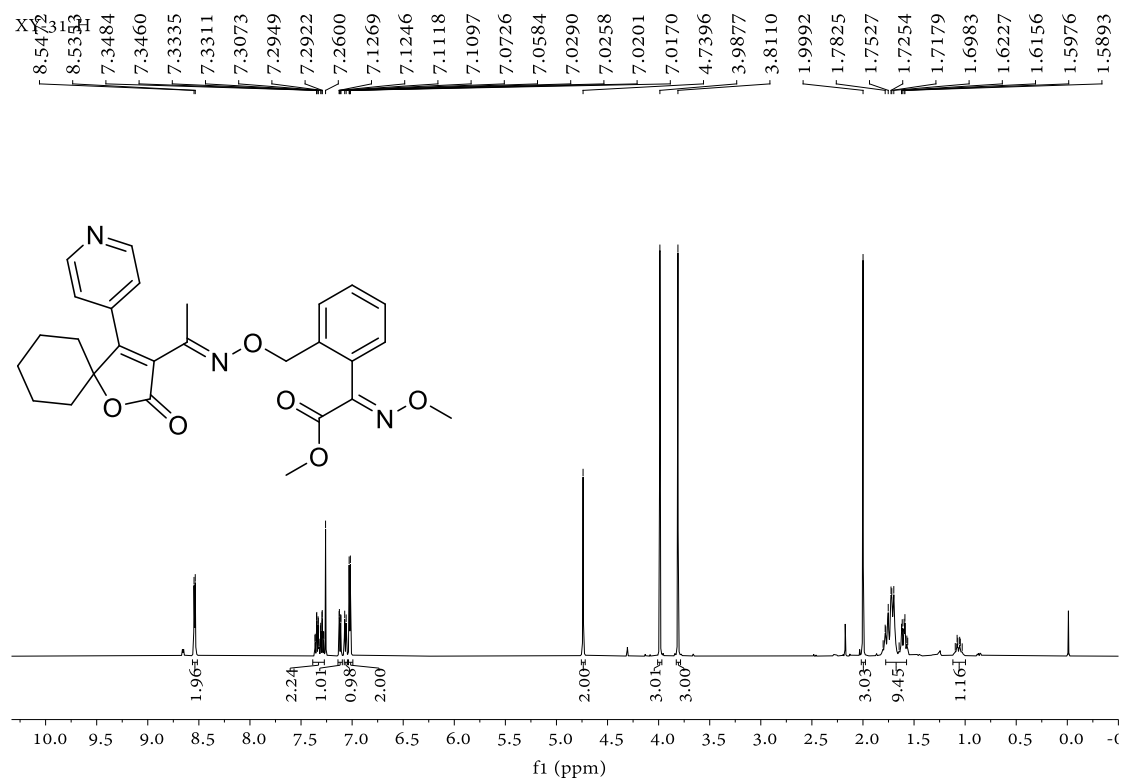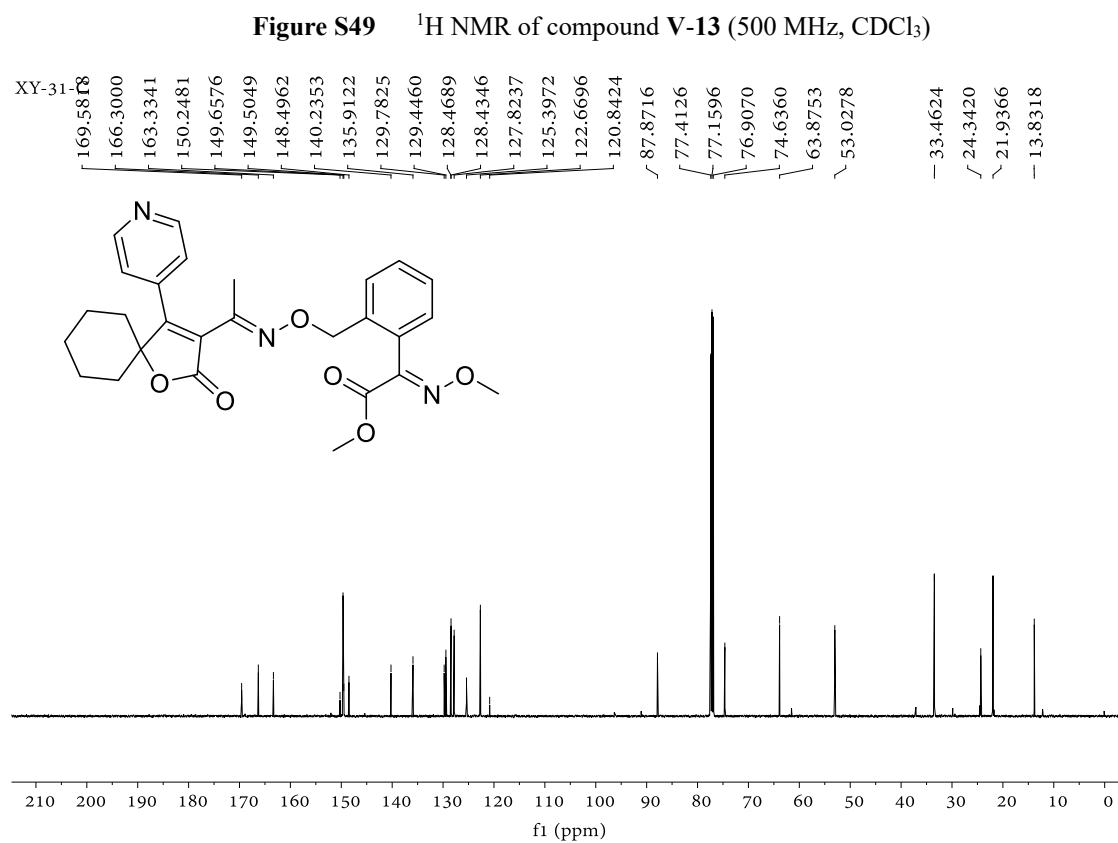

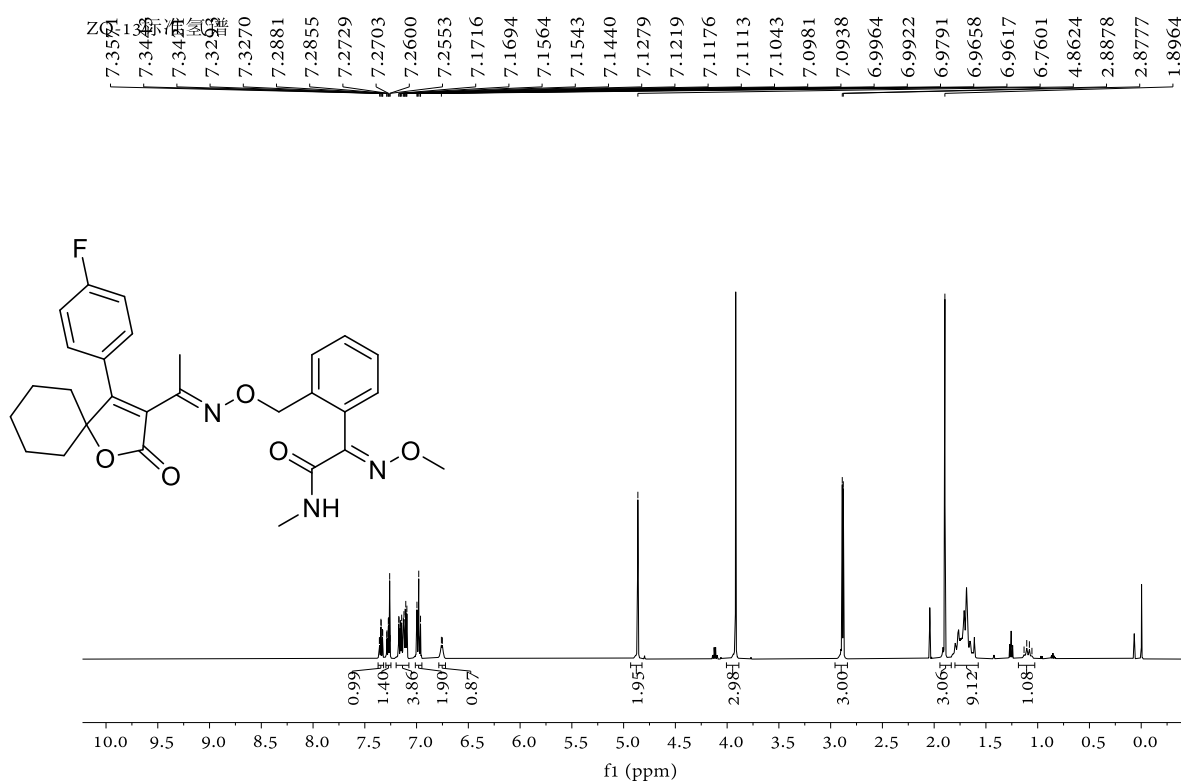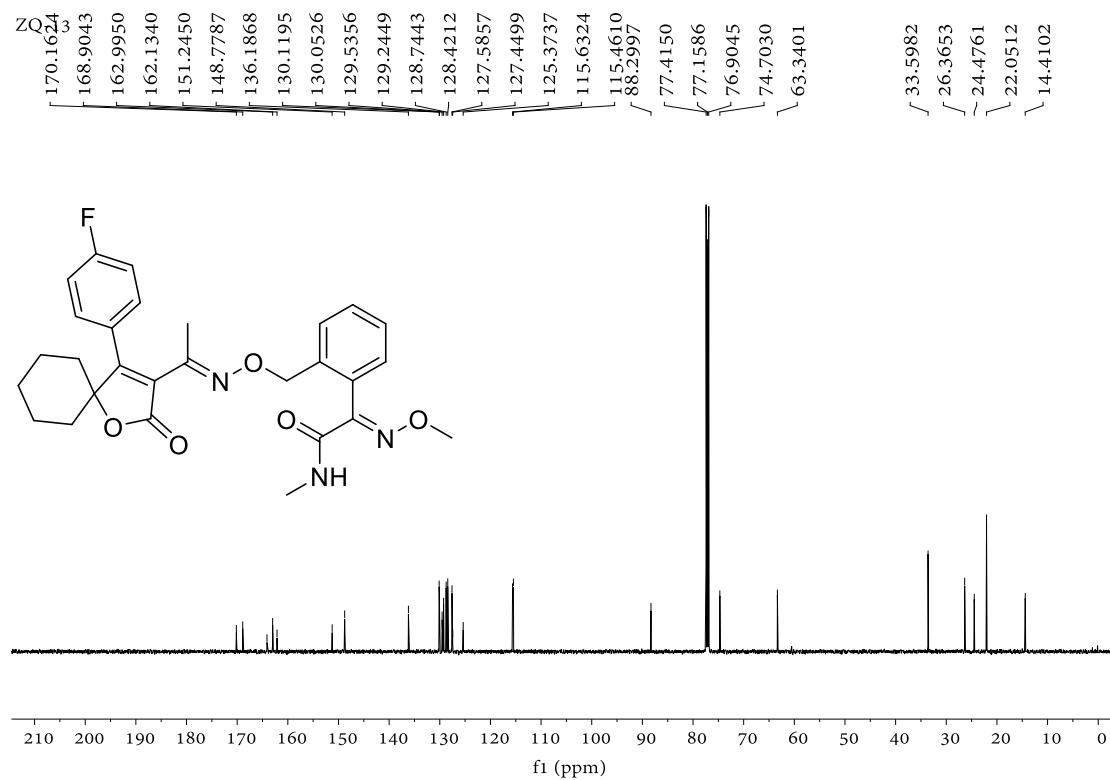

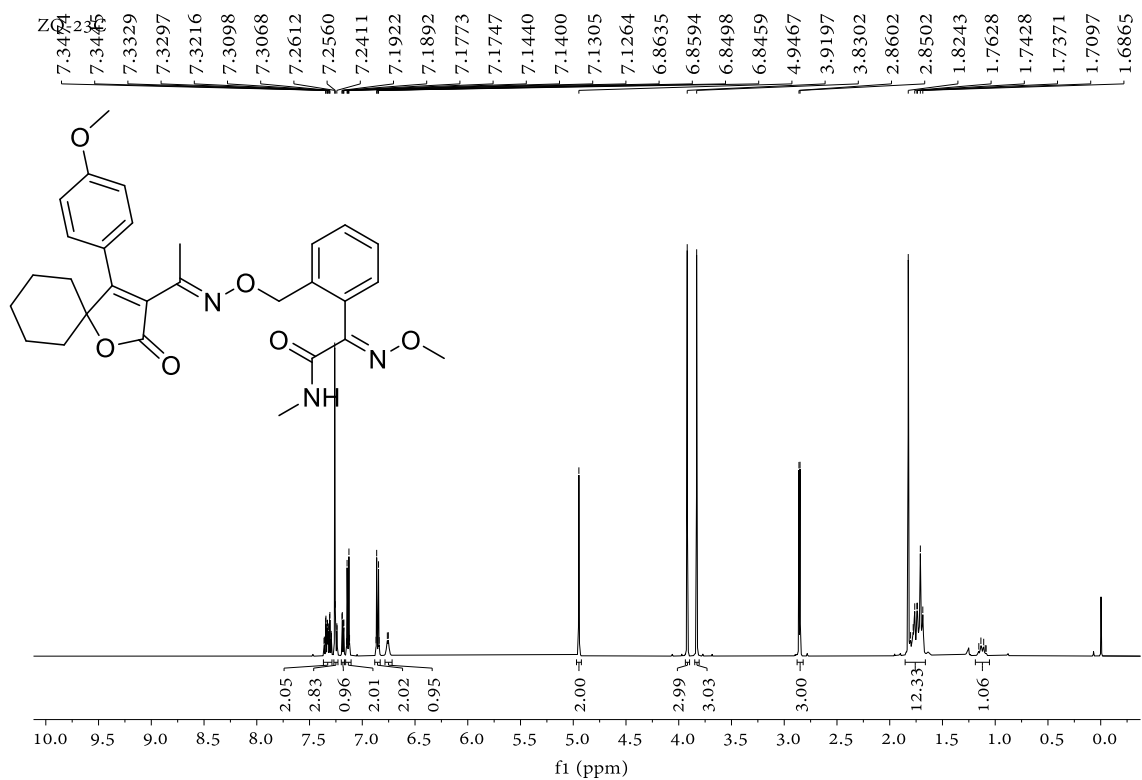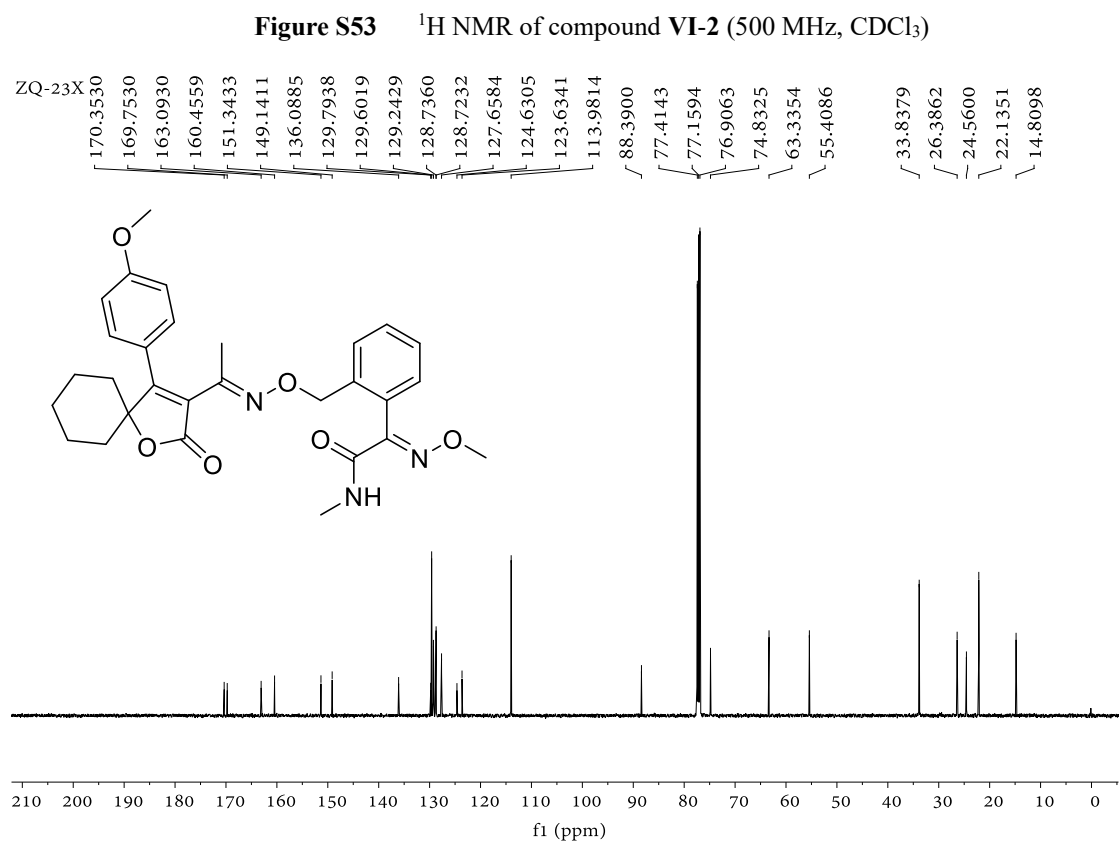

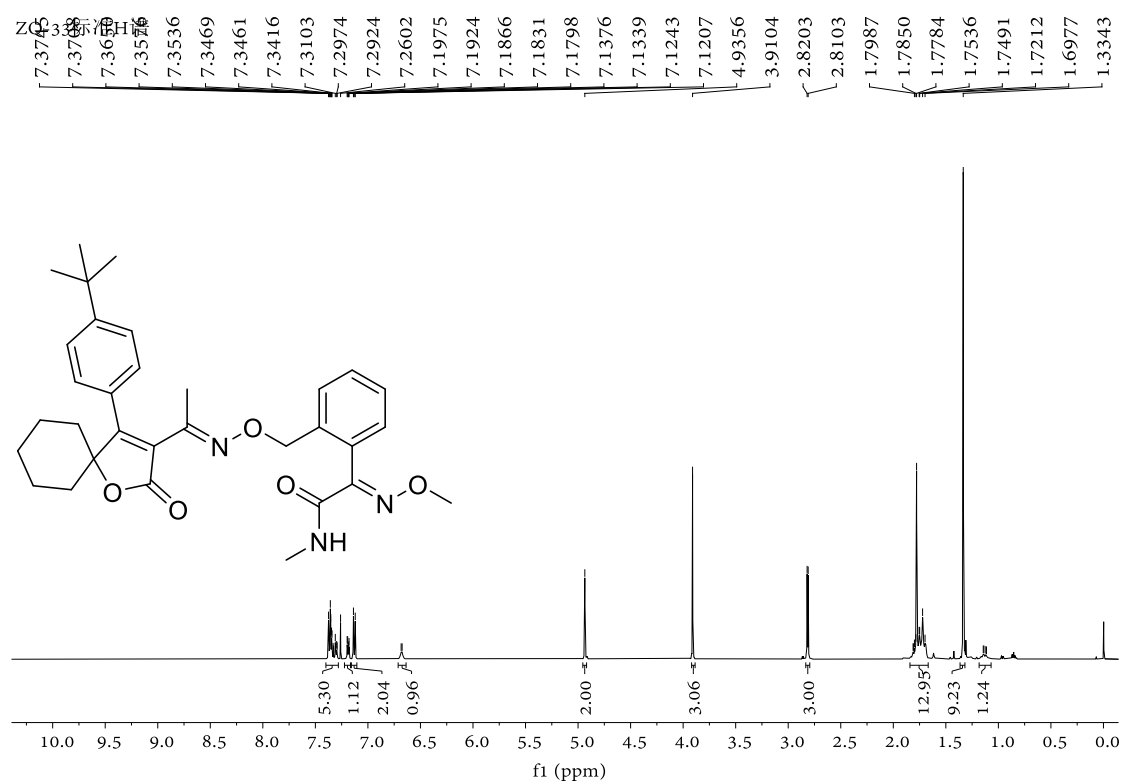

**Figure S55**  $^1\text{H}$  NMR of compound VI-3 (500 MHz,  $\text{CDCl}_3$ )

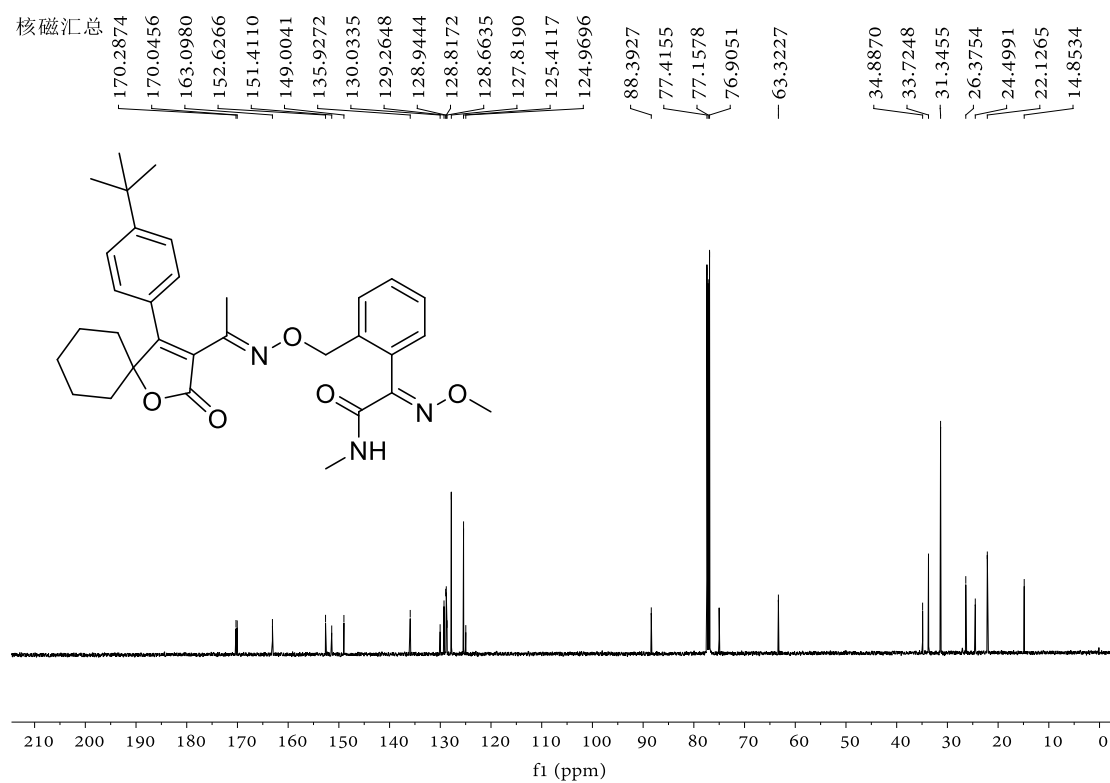

**Figure S56**  $^{13}\text{C}$  NMR of compound VI-3 (126 MHz,  $\text{CDCl}_3$ )

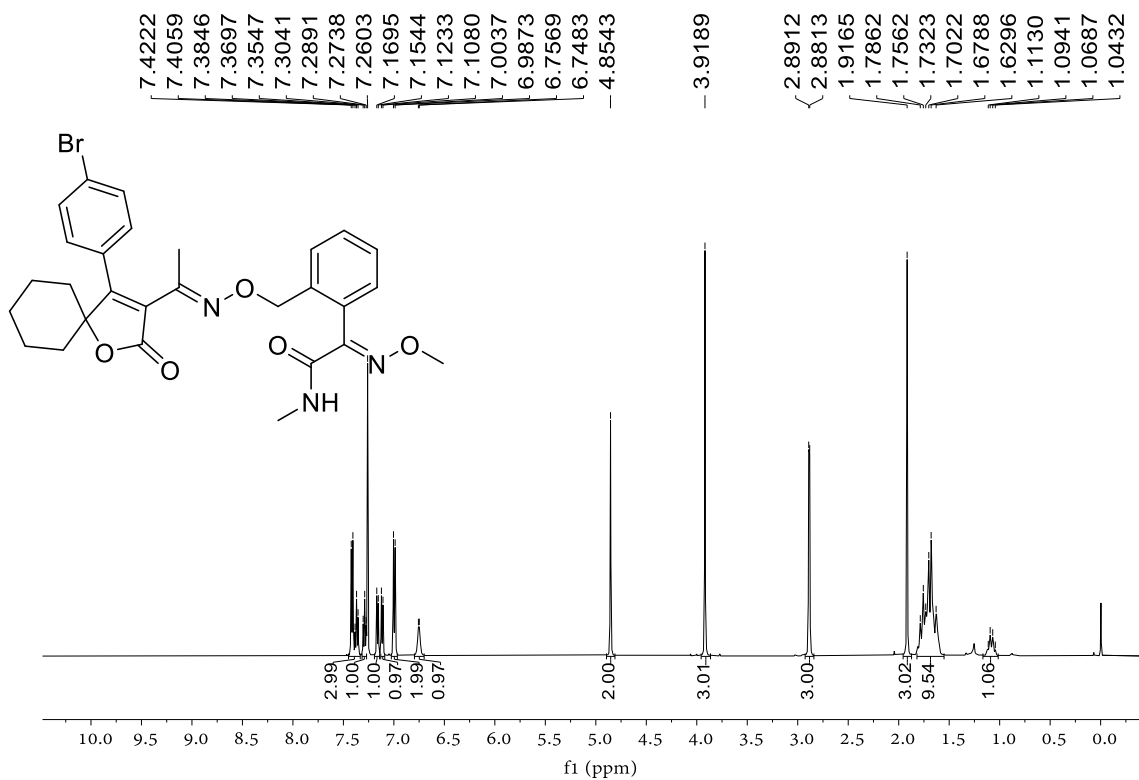

**Figure S57**  $^1\text{H}$  NMR of compound VI-4 (500 MHz,  $\text{CDCl}_3$ )

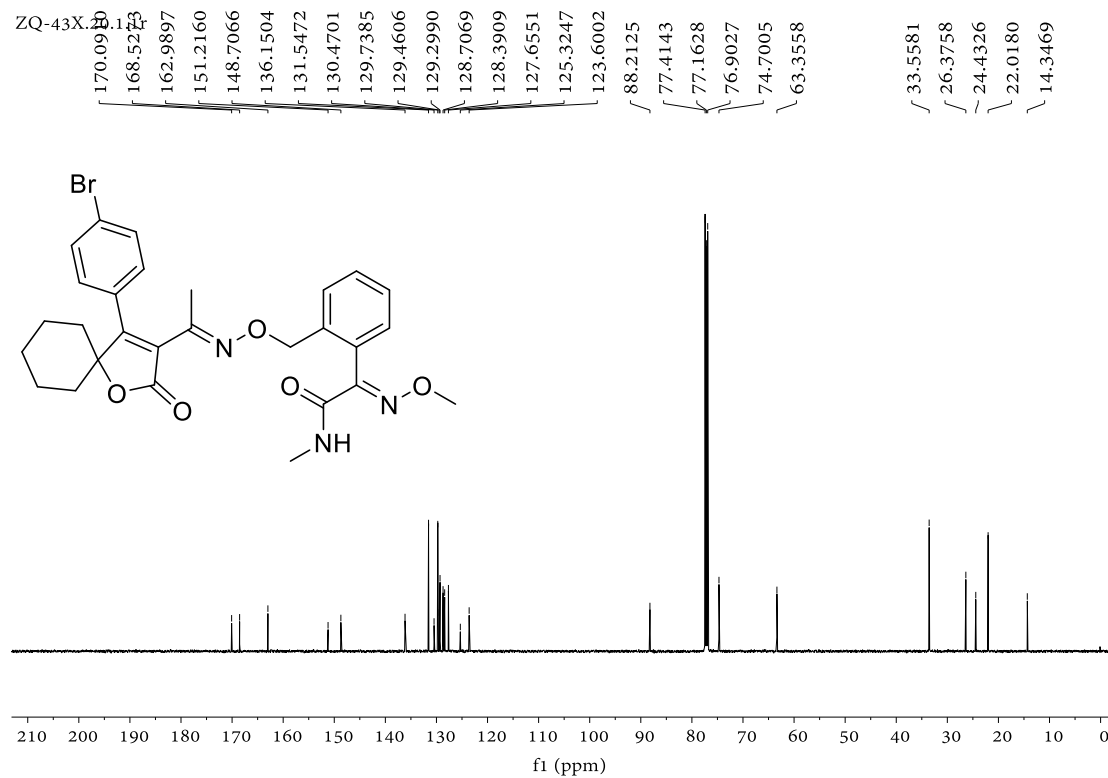

**Figure S58**  $^{13}\text{C}$  NMR of compound VI-4 (126 MHz,  $\text{CDCl}_3$ )

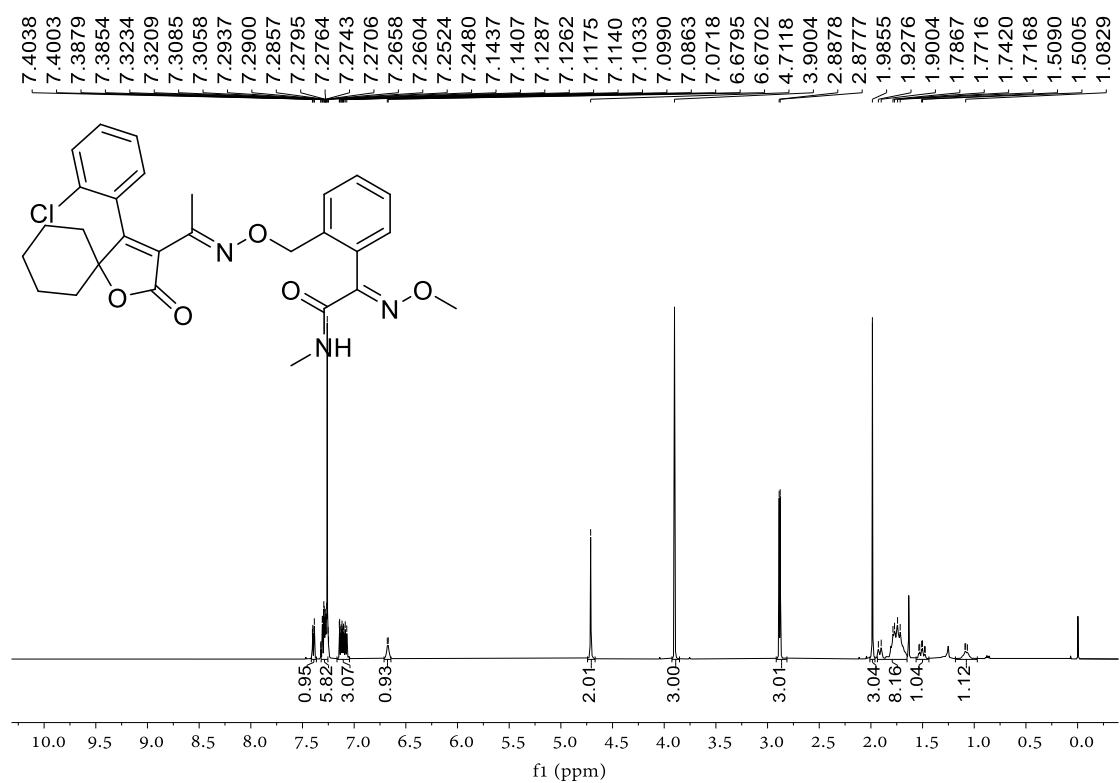

**Figure S59**  $^1\text{H}$  NMR of compound VI-5 (500 MHz,  $\text{CDCl}_3$ )

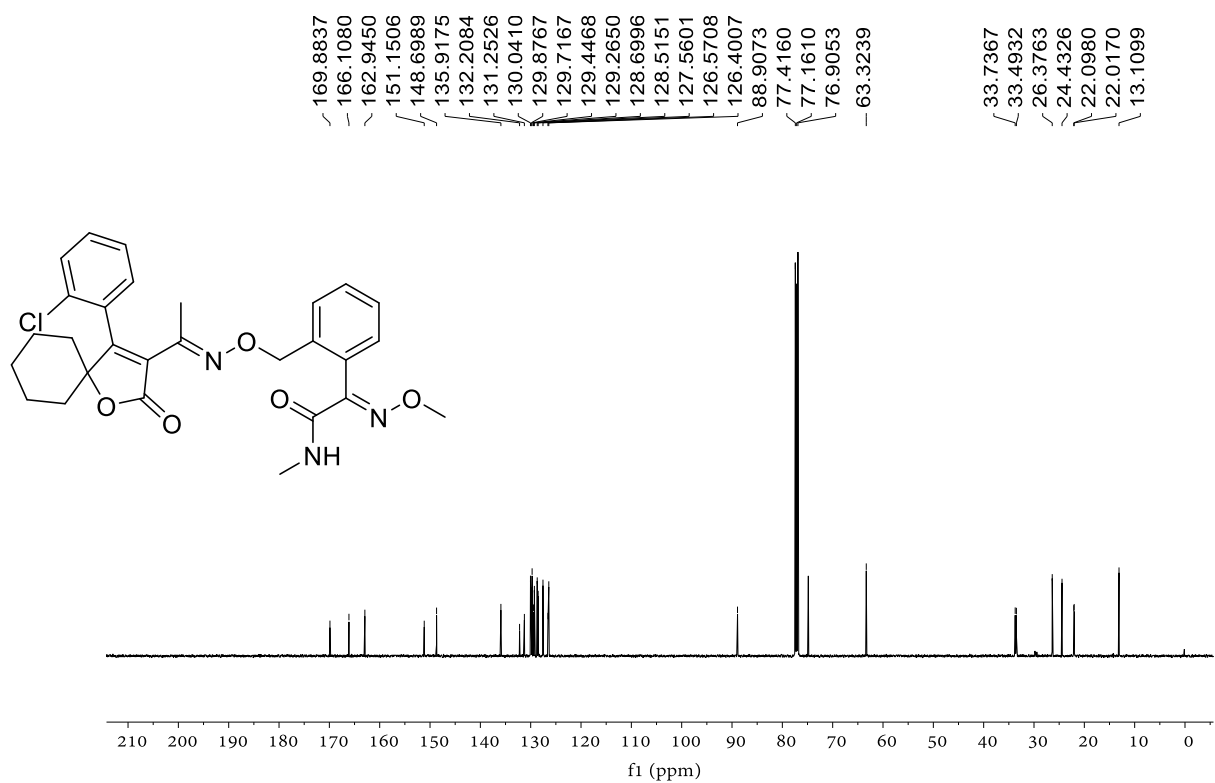

**Figure S60**  $^{13}\text{C}$  NMR of compound VI-5 (126 MHz,  $\text{CDCl}_3$ )

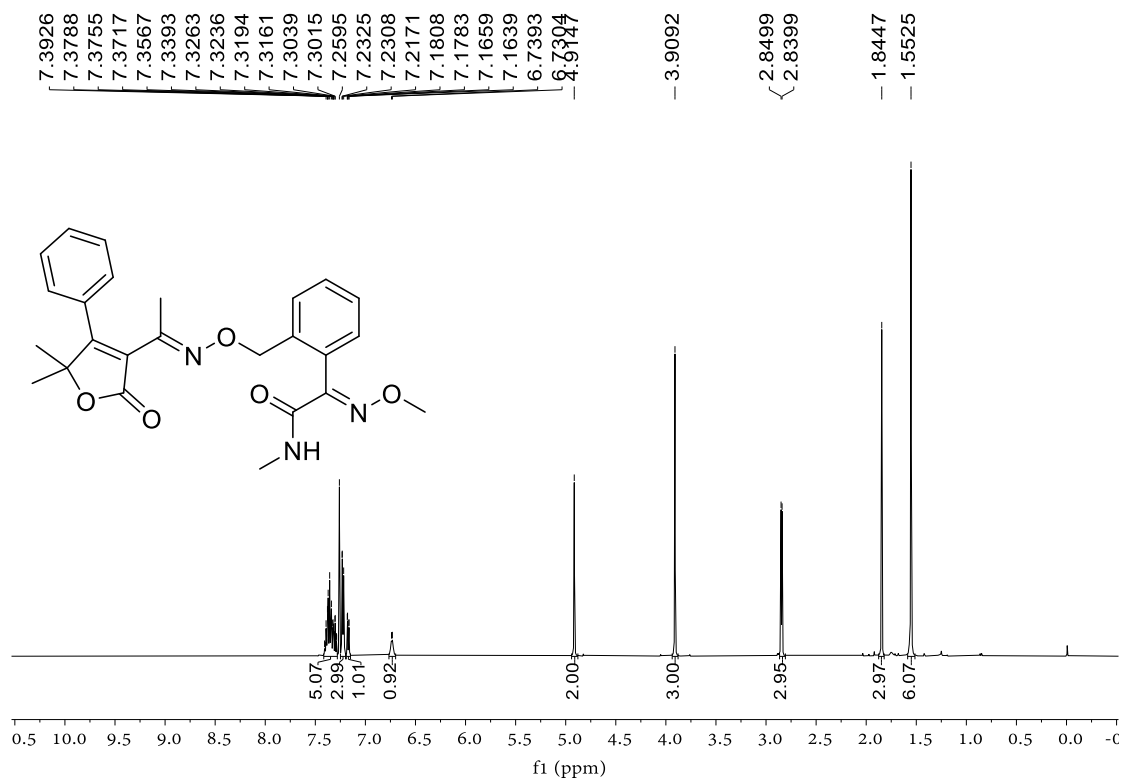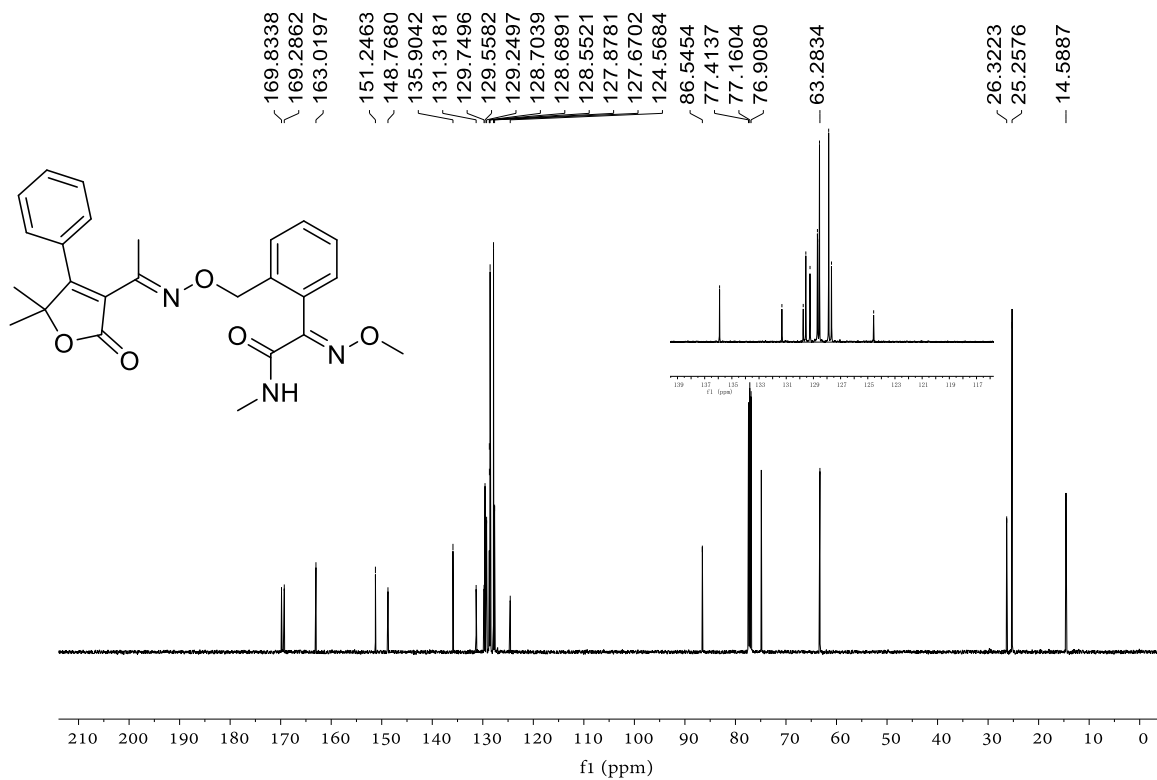



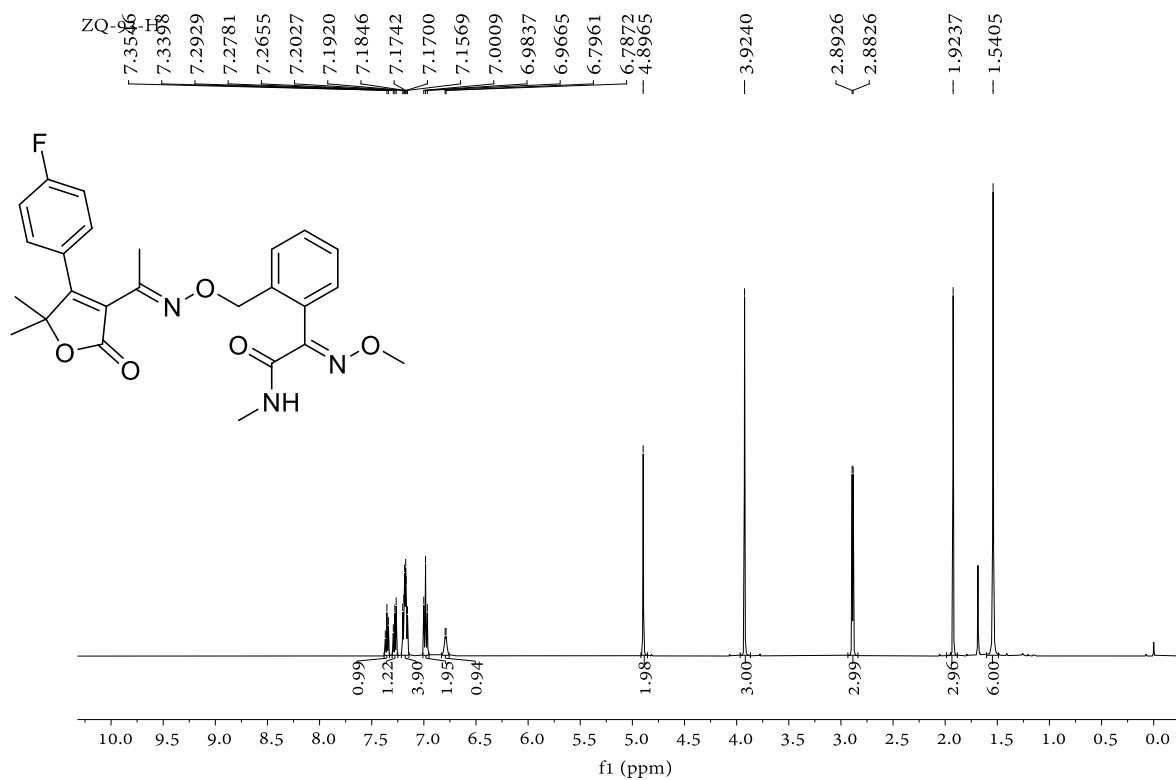

**Figure S63** <sup>1</sup>H NMR of compound VI-7 (500 MHz, CDCl<sub>3</sub>)

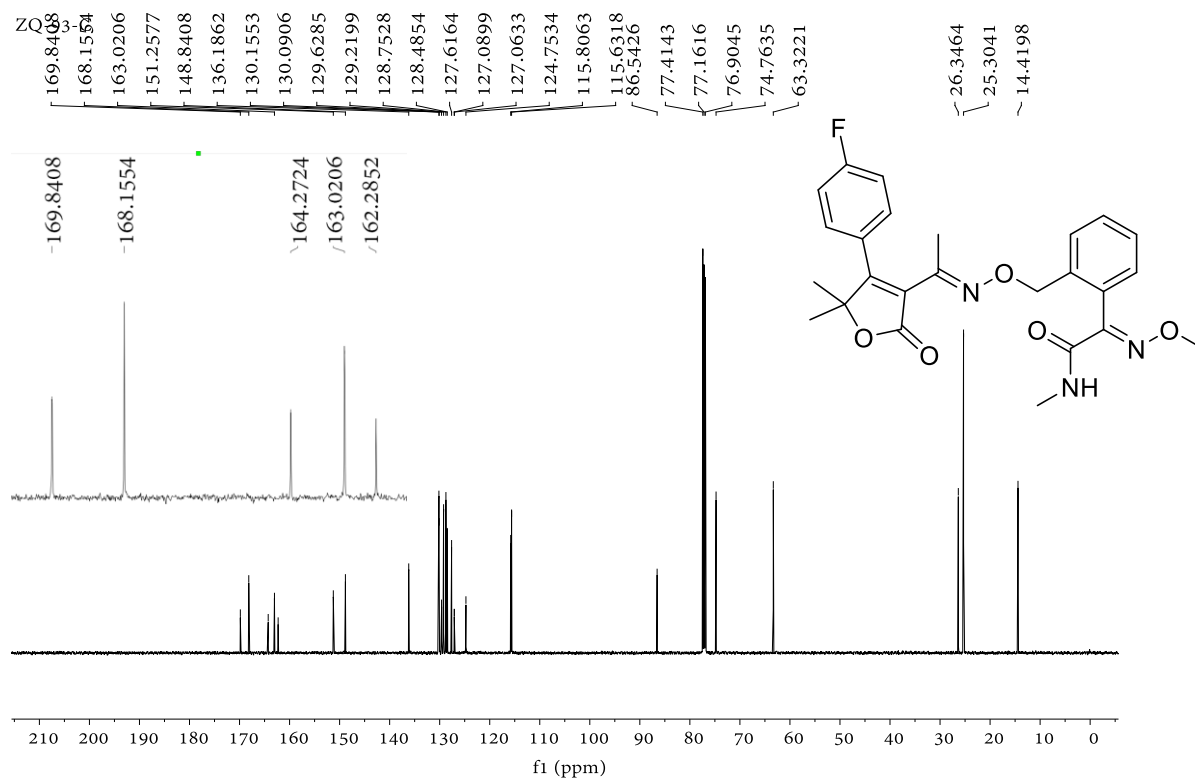

**Figure S64** <sup>13</sup>C NMR of compound VI-7 (126 MHz, CDCl<sub>3</sub>)

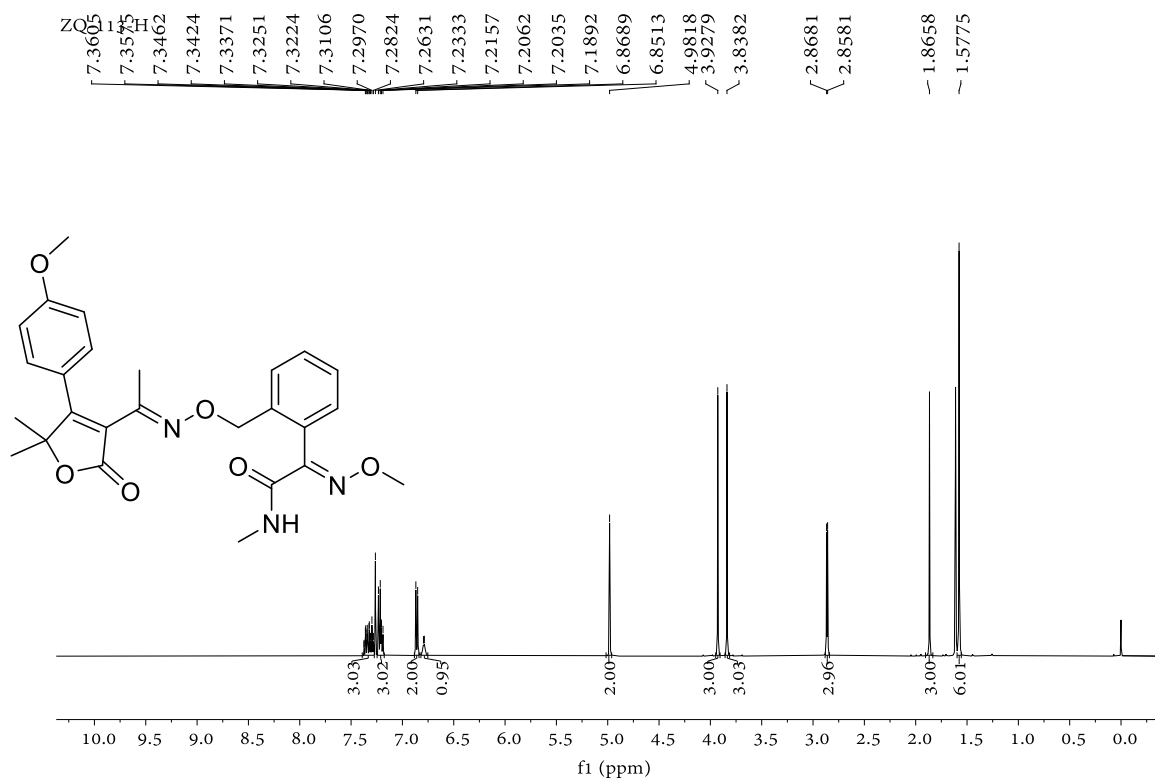

**Figure S65**  $^1\text{H}$  NMR of compound VI-8 (500 MHz,  $\text{CDCl}_3$ )

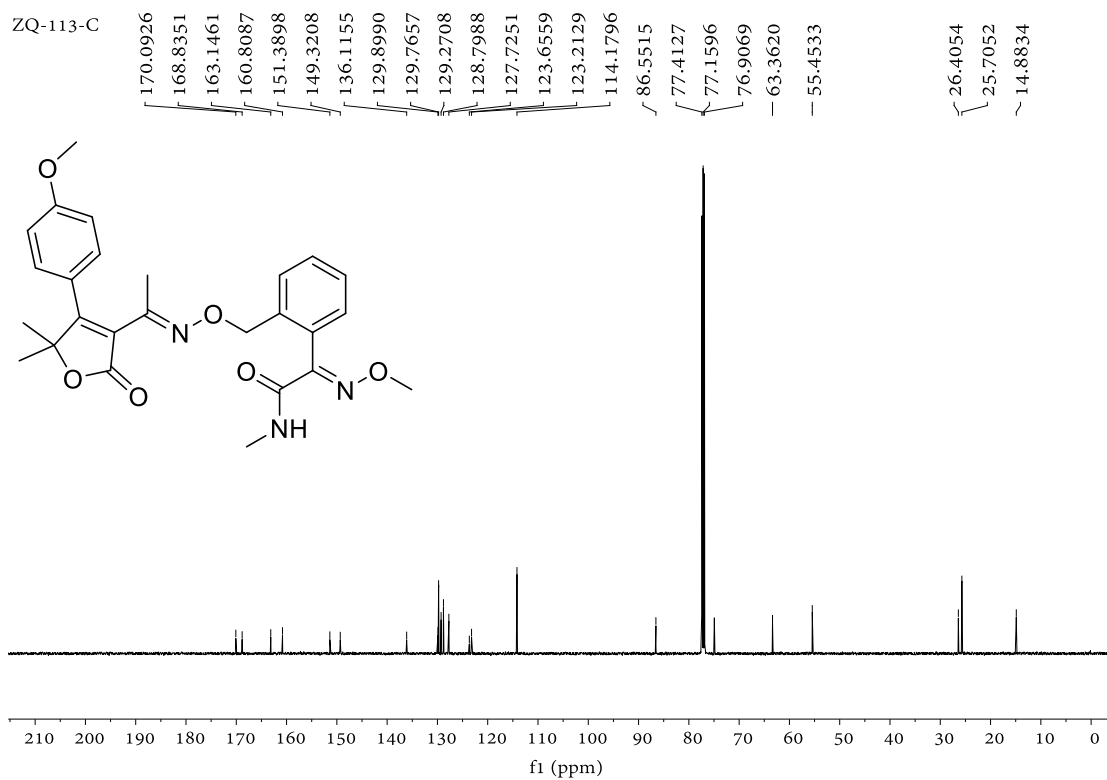

**Figure S66**  $^{13}\text{C}$  NMR of compound VI-8 (126 MHz,  $\text{CDCl}_3$ )



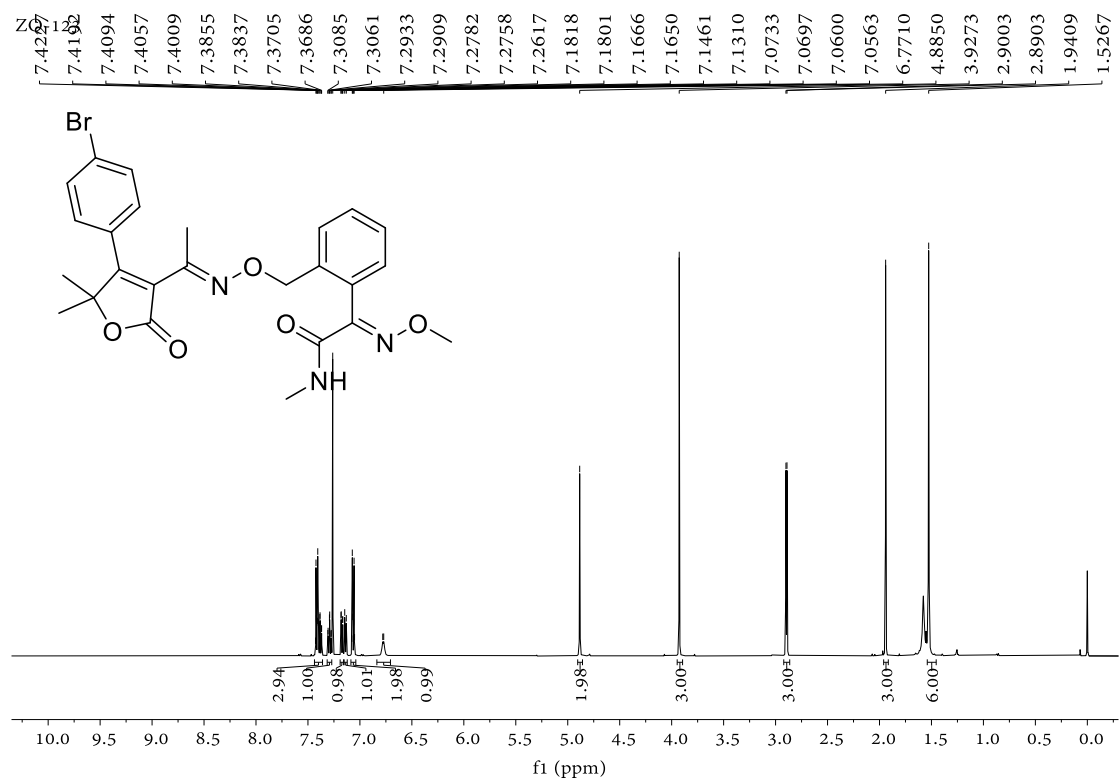

**Figure S69** <sup>1</sup>H NMR of compound **VI-10** (500 MHz, CDCl<sub>3</sub>)

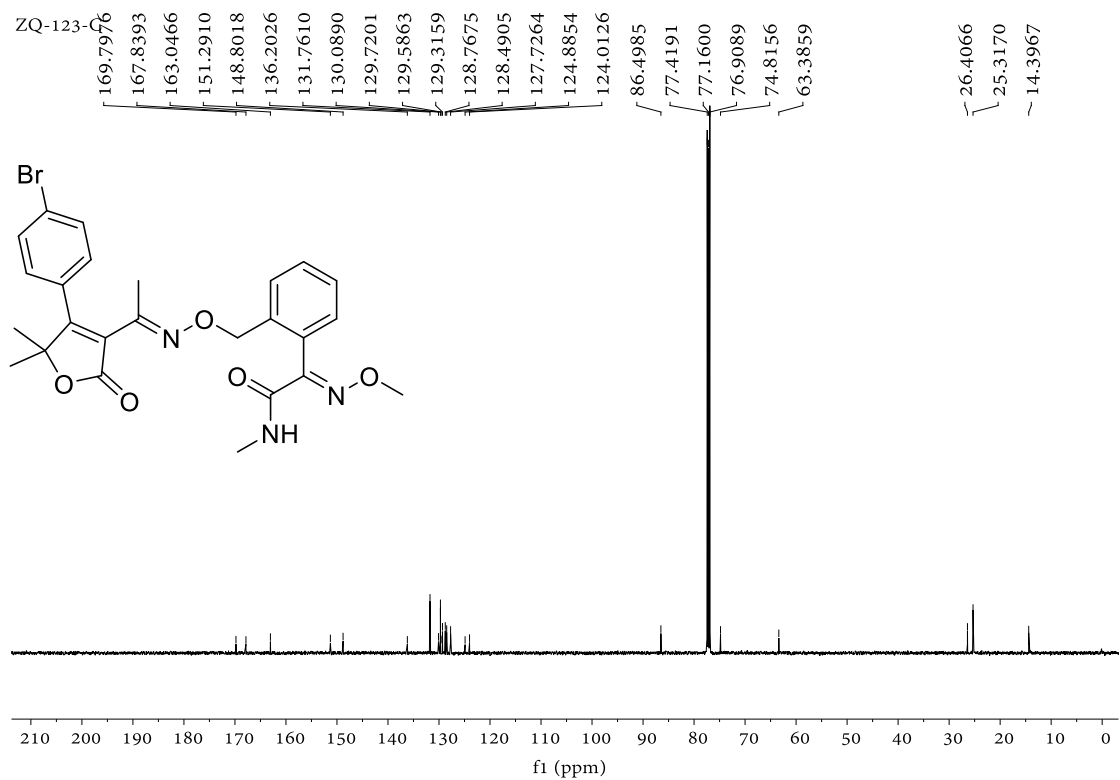

**Figure S70** <sup>13</sup>C NMR of compound **VI-10** (126 MHz, CDCl<sub>3</sub>)

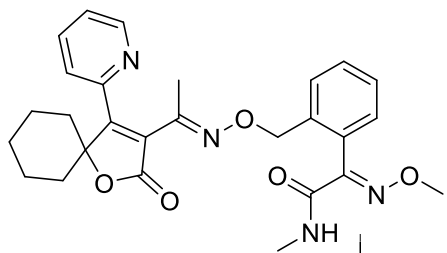

**Figure S71**  $^1\text{H}$  NMR of compound **VI-11** (500 MHz,  $\text{CDCl}_3$ )

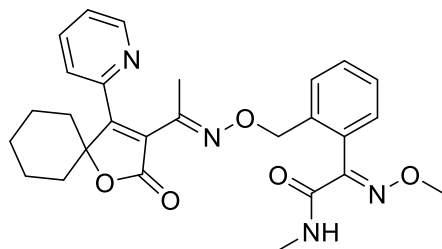

**Figure S72**  $^{13}\text{C}$  NMR of compound **VI-11** (126 MHz,  $\text{CDCl}_3$ )

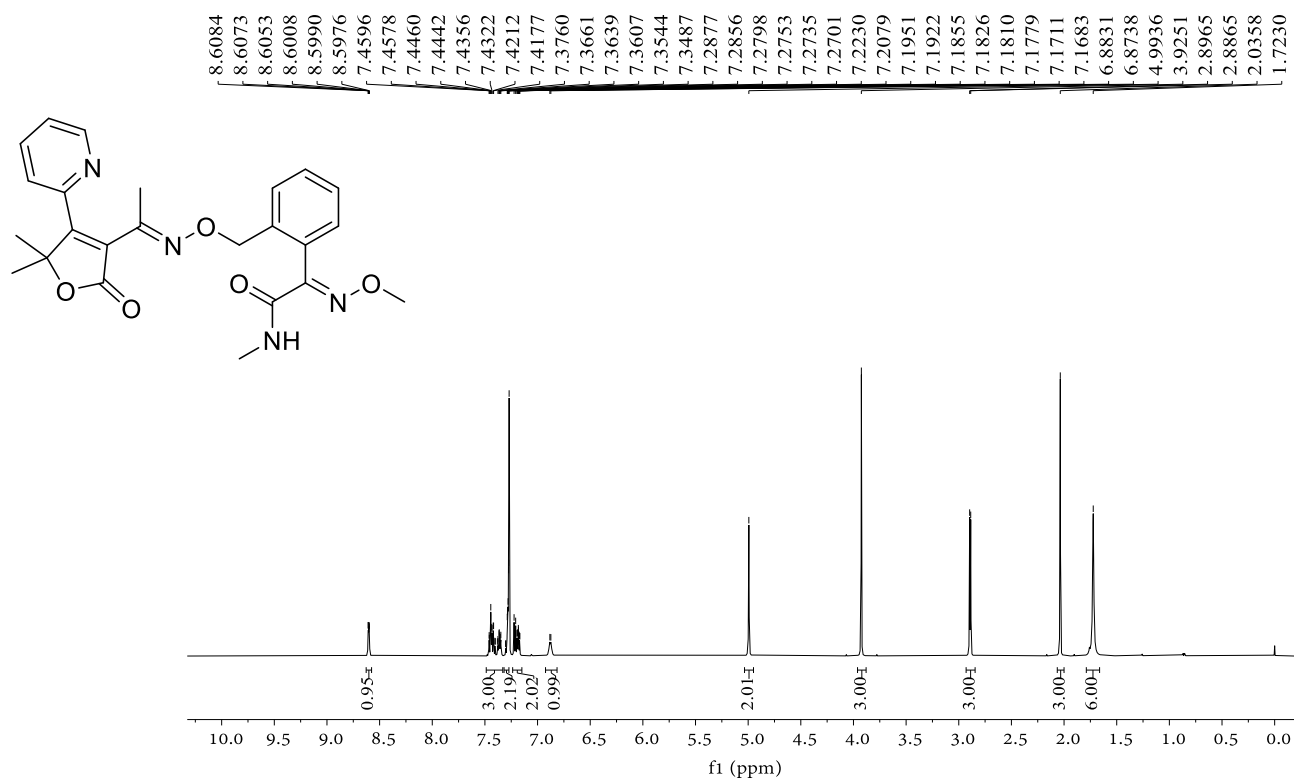

**Figure S73** <sup>1</sup>H NMR of compound VI-12 (500 MHz, CDCl<sub>3</sub>)

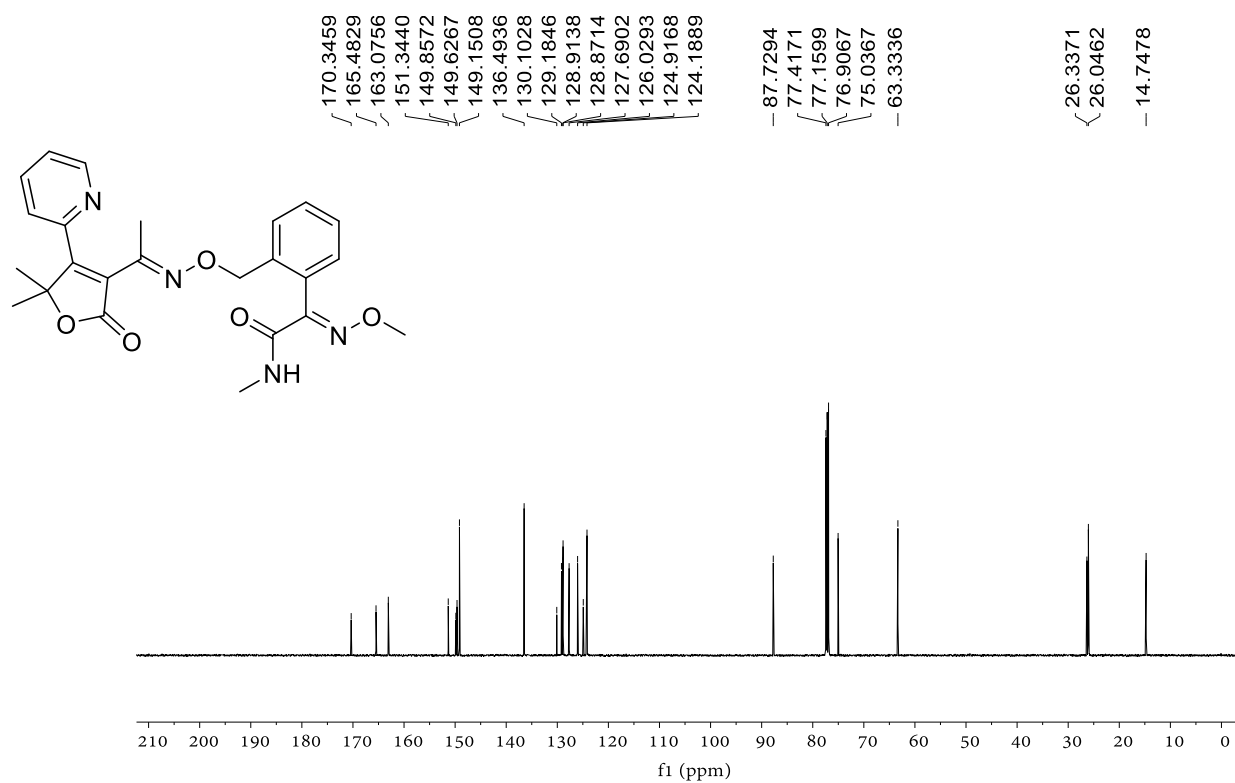

**Figure S74** <sup>13</sup>C NMR of compound VI-12 (126 MHz, CDCl<sub>3</sub>)

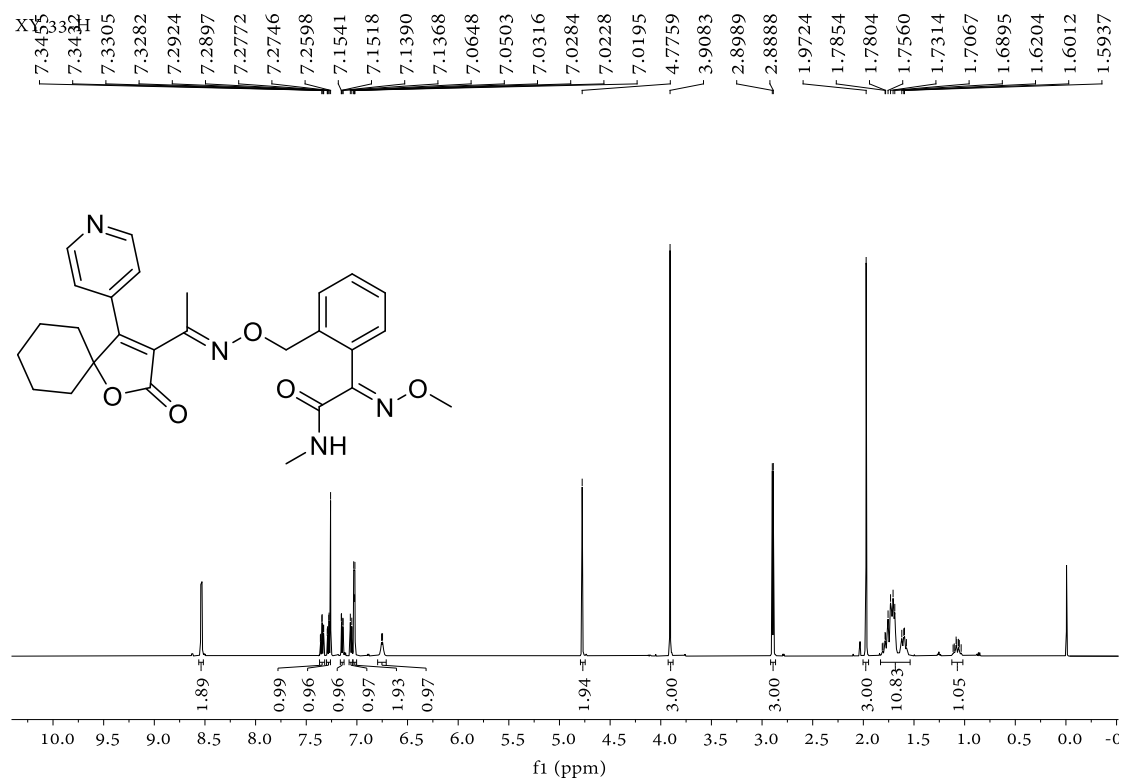

**Figure S75**  $^1\text{H}$  NMR of compound VI-13 (500 MHz,  $\text{CDCl}_3$ )

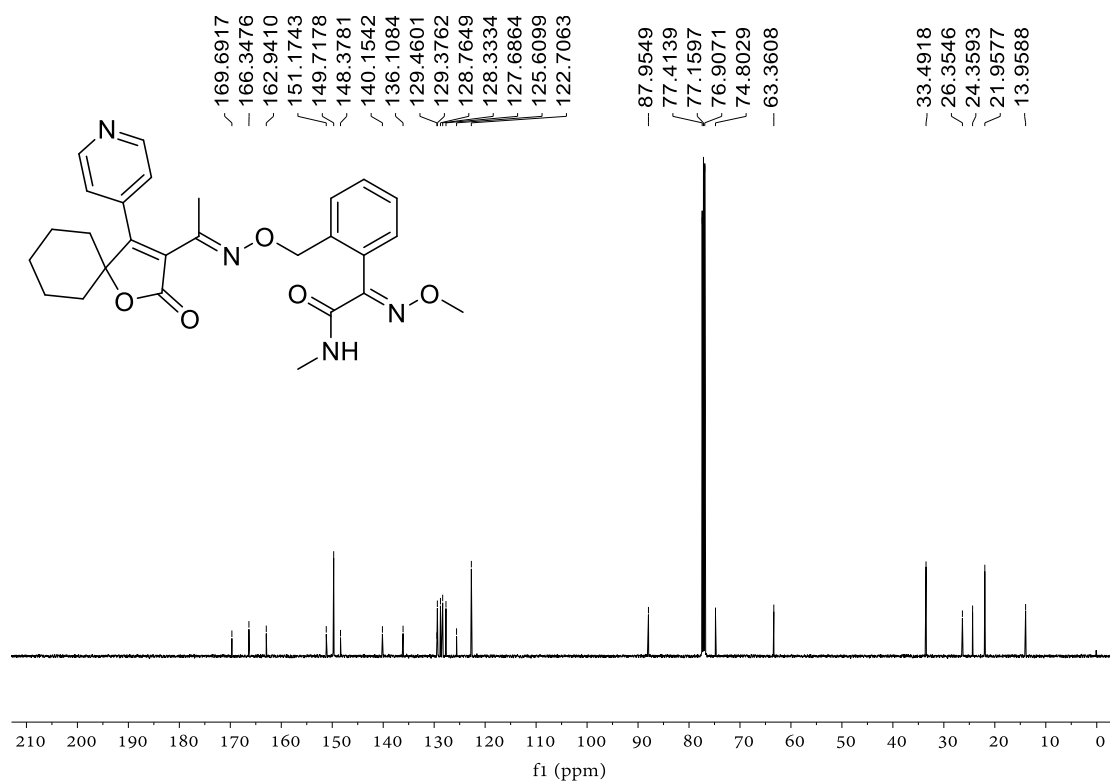

**Figure S76**  $^{13}\text{C}$  NMR of compound VI-13 (126 MHz,  $\text{CDCl}_3$ )

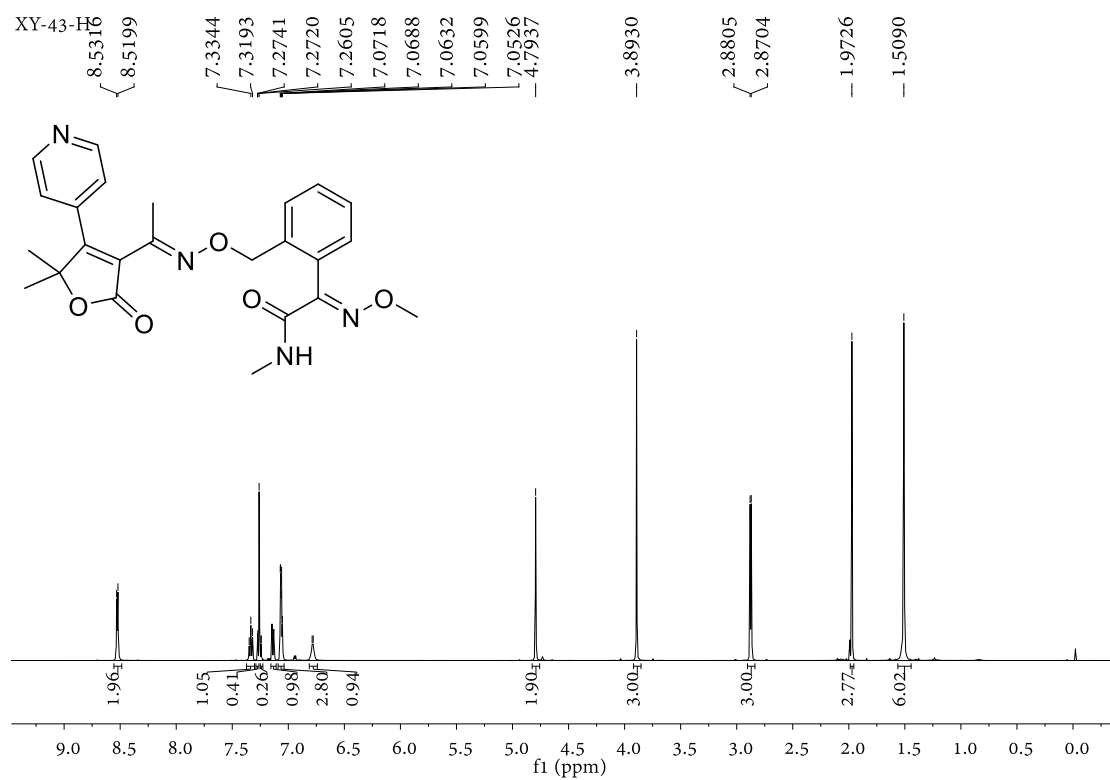

**Figure S77** <sup>1</sup>H NMR of compound VI-14 (500 MHz, CDCl<sub>3</sub>)

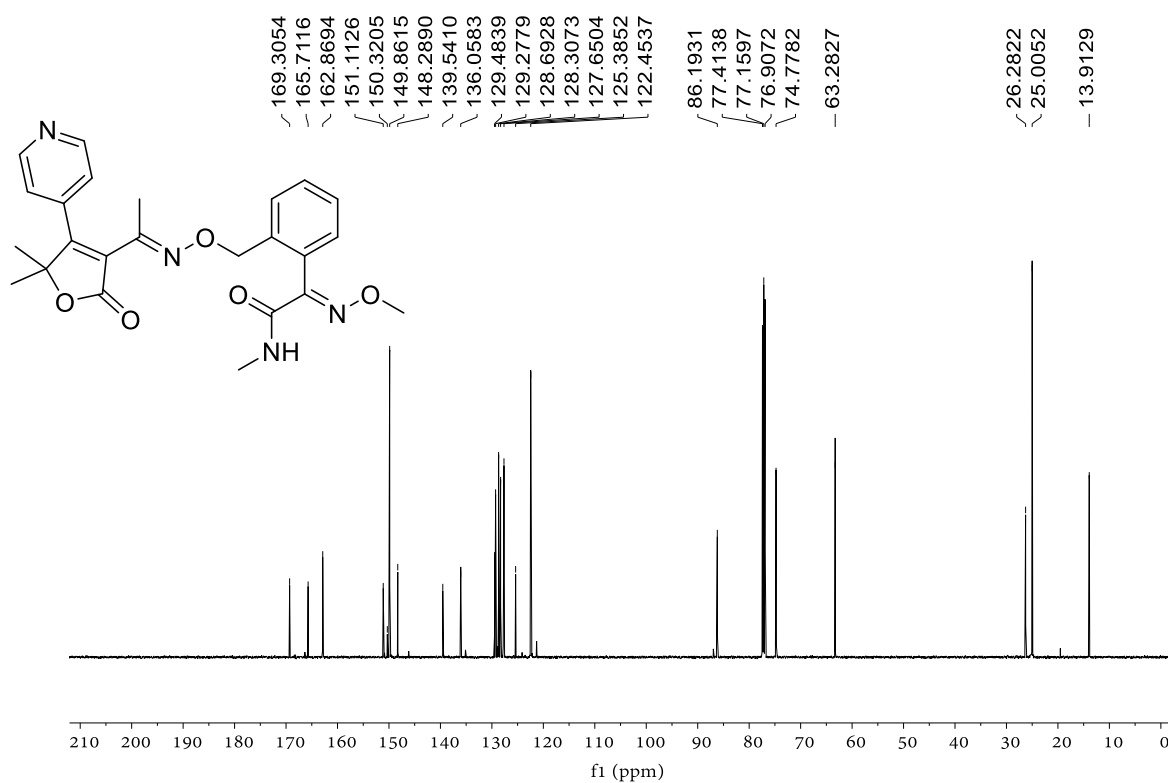

**Figure S78** <sup>13</sup>C NMR of compound VI-14 (126 MHz, CDCl<sub>3</sub>)



2. The high resolution mass spectrometry report spectra of compounds **VI-3**, **VI-8** and **VI-13**

| Sample No.  | Formula (M)          | Ion Formula          | Measured m/z | Calc m/z | Diff (ppm) |
|-------------|----------------------|----------------------|--------------|----------|------------|
| <b>VI-3</b> | $C_{32}H_{39}N_3O_5$ | $C_{32}H_{40}N_3O_5$ | 546.2966     | 546.2962 | 0.73       |

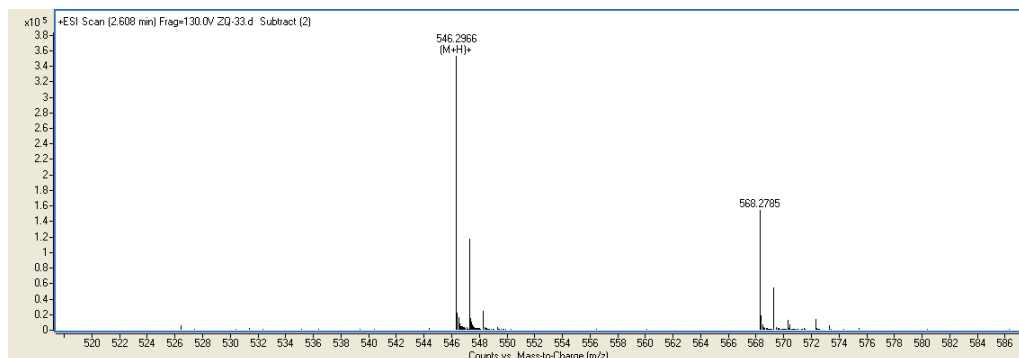

**Figure S79** high resolution mass spectrometry report spectra of compound **VI-3**

| Sample No.  | Formula (M)          | Ion Formula          | Measured m/z | Calc m/z | Diff (ppm) |
|-------------|----------------------|----------------------|--------------|----------|------------|
| <b>VI-8</b> | $C_{26}H_{29}N_3O_6$ | $C_{26}H_{30}N_3O_6$ | 480.2131     | 480.2129 | 0.42       |

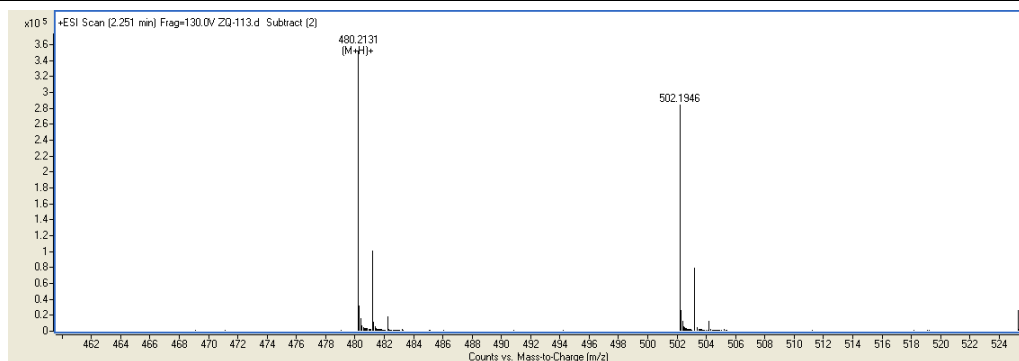

**Figure S80** high resolution mass spectrometry report spectra of compound **VI-8**

| Sample No.   | Formula (M)          | Ion Formula          | Measured m/z | Calc m/z | Diff (ppm) |
|--------------|----------------------|----------------------|--------------|----------|------------|
| <b>VI-13</b> | $C_{27}H_{30}N_4O_5$ | $C_{27}H_{31}N_4O_5$ | 491.2291     | 491.2289 | 0.41       |

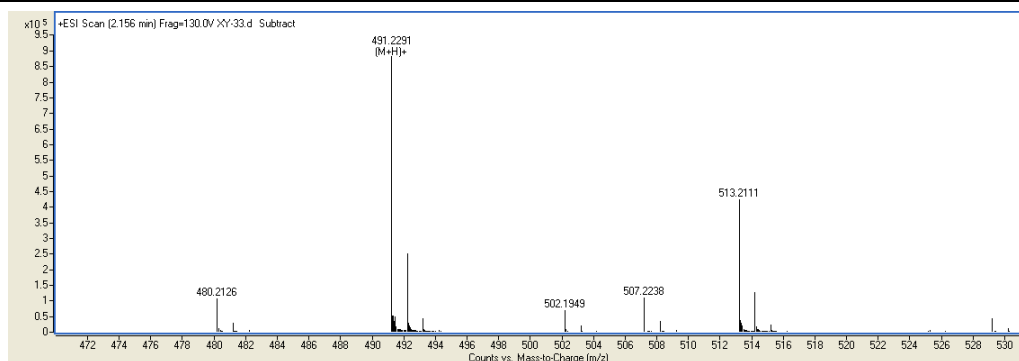

**Figure S81** high resolution mass spectrometry report spectra of compound **VI-13**

3. The X-ray crystal structure of target compound **IV-6**

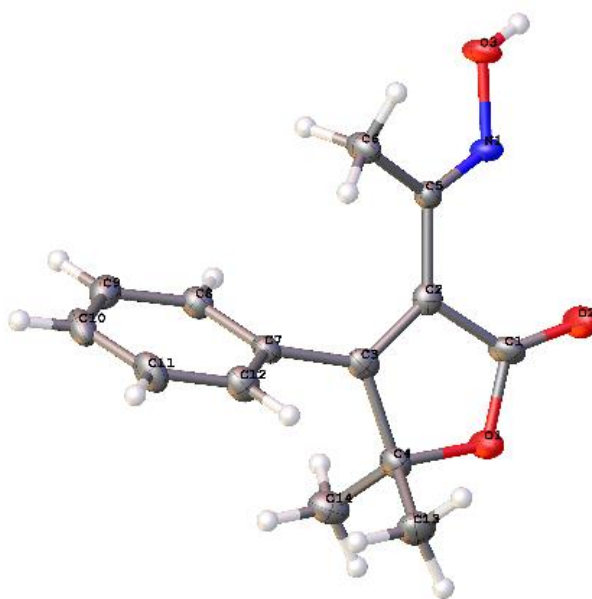

**Figure S82** The X-ray crystal structure of target compound **IV-6**

**Table S1. Crystal data and structure refinement of compound 7471 (IV-6, 2162653)**

|                                                                                         |                                                   |
|-----------------------------------------------------------------------------------------|---------------------------------------------------|
| Empirical formula                                                                       | C <sub>14</sub> H <sub>15</sub> NO <sub>3</sub>   |
| Formula weight                                                                          | 245.27                                            |
| Temperature / K                                                                         | 125.50(14)                                        |
| Crystal system                                                                          | tetragonal                                        |
| Space group                                                                             | P4 <sub>1</sub> 2 <sub>1</sub> 2                  |
| a / Å, b / Å, c / Å                                                                     | 8.8563(5), 8.8563(5), 32.1060(18)                 |
| $\alpha$ / °, $\beta$ / °, $\gamma$ / °                                                 | 90.00, 90.00, 90.00                               |
| Volume / Å <sup>3</sup>                                                                 | 2518.2(2)                                         |
| Z                                                                                       | 8                                                 |
| $\rho_{\text{calc}}$ / mg mm <sup>-3</sup>                                              | 1.294                                             |
| $\mu$ / mm <sup>-1</sup>                                                                | 0.091                                             |
| F(000)                                                                                  | 1040                                              |
| Crystal size / mm <sup>3</sup>                                                          | 0.55 × 0.34 × 0.02                                |
| 2 $\theta$ range for data collection                                                    | 6.5 to 51.96°                                     |
| Index ranges                                                                            | -10 ≤ h ≤ 10, -10 ≤ k ≤ 10, -39 ≤ l ≤ 25          |
| Reflections collected                                                                   | 7531                                              |
| Independent reflections                                                                 | 2427[R(int) = 0.0522 (inf-0.9Å)]                  |
| Data/restraints/parameters                                                              | 2427/0/167                                        |
| Goodness-of-fit on F <sup>2</sup>                                                       | 1.085                                             |
| Final R indexes [I > 2 $\sigma$ (I) i.e. F <sub>o</sub> > 4 $\sigma$ (F <sub>o</sub> )] | R <sub>1</sub> = 0.0514, wR <sub>2</sub> = 0.1026 |
| Final R indexes [all data]                                                              | R <sub>1</sub> = 0.0655, wR <sub>2</sub> = 0.1114 |
| Largest diff. peak/hole / e Å <sup>-3</sup>                                             | 0.204/-0.181                                      |

**TableS2 Fractional Atomic Coordinates ( $\times 10^4$ ) and Equivalent Isotropic Displacement Parameters ( $\text{\AA}^2 \times 10^3$ ) for exp\_7471. Ueq is defined as 1/3 of of the trace of the 43rthogonalized UIJ tensor.**

| Atom | x        | y          | z         | U(eq)   |
|------|----------|------------|-----------|---------|
| O3   | 9425(2)  | 6758.6(19) | 22.1(5)   | 25.9(4) |
| N1   | 8955(2)  | 7582(2)    | 372.3(6)  | 20.7(5) |
| O1   | 7667(2)  | 9457(2)    | 1504.8(5) | 27.7(5) |
| O2   | 6858(2)  | 9226(2)    | 852.0(5)  | 33.9(5) |
| C6   | 10567(3) | 5720(3)    | 725.1(8)  | 25.0(6) |
| C5   | 9535(3)  | 7058(3)    | 711.0(7)  | 17.3(5) |
| C10  | 13914(3) | 5898(3)    | 1887.8(8) | 27.6(6) |
| C14  | 9822(3)  | 10179(3)   | 1918.3(8) | 30.3(7) |
| C3   | 9736(3)  | 7833(3)    | 1475.1(7) | 20.3(6) |
| C2   | 9106(3)  | 7859(3)    | 1095.0(7) | 19.2(6) |
| C1   | 7772(3)  | 8877(3)    | 1115.0(7) | 24.9(6) |
| C4   | 8868(3)  | 8860(3)    | 1769.9(7) | 23.7(6) |
| C11  | 12569(3) | 5394(3)    | 2054.9(8) | 28.4(6) |
| C12  | 11199(3) | 5991(3)    | 1923.5(8) | 25.3(6) |
| C8   | 12532(3) | 7597(3)    | 1442.3(7) | 21.8(5) |
| C7   | 11173(3) | 7118(3)    | 1613.9(7) | 19.8(6) |
| C9   | 13900(3) | 6997(3)    | 1579.1(8) | 25.5(6) |
| C13  | 8099(3)  | 8041(3)    | 2129.1(8) | 29.6(6) |

**Table S3 Anisotropic Displacement Parameters ( $\text{\AA}^2 \times 10^3$ ) for exp\_7471. The Anisotropic displacement factor exponent takes the form:  $-2\pi^2[h^2a^*2U_{11} + \dots + 2hka \times b \times U_{12}]$**

| Atom | U <sub>11</sub> | U <sub>22</sub> | U <sub>33</sub> | U <sub>23</sub> | U <sub>13</sub> | U <sub>12</sub> |
|------|-----------------|-----------------|-----------------|-----------------|-----------------|-----------------|
| O3   | 35.9(11)        | 30.4(10)        | 11.4(9)         | -2.2(8)         | -0.1(9)         | 10.4(8)         |
| N1   | 23.9(11)        | 24.0(12)        | 14.4(10)        | -4.3(9)         | 1.9(9)          | 4.2(10)         |
| O1   | 29(1)           | 36.3(10)        | 18.0(9)         | -3.9(8)         | -2.0(8)         | 11.7(9)         |
| O2   | 31.9(11)        | 49.6(13)        | 20.1(10)        | -1.7(9)         | -5.0(9)         | 19.1(10)        |
| C6   | 30.3(15)        | 26.2(15)        | 18.6(14)        | -1.2(11)        | -4.5(11)        | 5.3(13)         |
| C5   | 17.0(12)        | 19.9(13)        | 15.2(12)        | 0.9(10)         | -0.8(10)        | -0.1(11)        |
| C10  | 25.6(15)        | 24.8(15)        | 32.4(15)        | -7.9(12)        | -12.0(13)       | 4.1(12)         |
| C14  | 38.1(17)        | 28.7(16)        | 24.0(14)        | -2.8(12)        | 0.0(13)         | -3.3(13)        |
| C3   | 22.1(13)        | 20.5(14)        | 18.3(13)        | 3.1(10)         | 1.5(11)         | -5.6(12)        |
| C2   | 19.1(13)        | 17.1(13)        | 21.4(14)        | 3.4(10)         | -0.3(11)        | -1.5(11)        |
| C1   | 31.2(16)        | 30.2(15)        | 13.4(13)        | 0.3(11)         | 0.9(11)         | 3.0(14)         |
| C4   | 24.6(14)        | 27.5(15)        | 18.9(13)        | -0.4(11)        | -4.0(11)        | 1.3(13)         |
| C11  | 33.0(16)        | 27.0(14)        | 25.2(14)        | 5.8(12)         | -10.5(12)       | 0.0(14)         |

|     |          |          |          |          |          |          |
|-----|----------|----------|----------|----------|----------|----------|
| C12 | 26.5(15) | 25.9(15) | 23.4(14) | 3.1(11)  | -1.2(12) | -5.2(13) |
| C8  | 23.7(13) | 21.4(13) | 20.2(13) | 0.4(11)  | -2.1(11) | -0.3(12) |
| C7  | 21.7(13) | 22.5(14) | 15.2(13) | -2.4(10) | -3.1(11) | -1.2(11) |
| C9  | 21.0(14) | 26.3(15) | 29.1(15) | -5.5(12) | -0.2(12) | -0.4(12) |
| C13 | 30.0(16) | 36.7(17) | 21.9(14) | 2.2(13)  | 5.2(13)  | -1.4(13) |

**Table S4 Bond Lengths for exp\_7471.**

| Atom | Atom | Length/Å |
|------|------|----------|
| O3   | N1   | 1.403(2) |
| N1   | C5   | 1.289(3) |
| O1   | C1   | 1.356(3) |
| O1   | C4   | 1.462(3) |
| O2   | C1   | 1.210(3) |
| C6   | C5   | 1.497(3) |
| C5   | C2   | 1.472(3) |
| C10  | C11  | 1.381(4) |
| C10  | C9   | 1.389(4) |
| C14  | C4   | 1.519(4) |
| C3   | C2   | 1.342(3) |
| C3   | C4   | 1.521(4) |
| C3   | C7   | 1.489(3) |
| C2   | C1   | 1.487(4) |
| C4   | C13  | 1.523(3) |
| C11  | C12  | 1.389(4) |
| C12  | C7   | 1.409(3) |
| C8   | C7   | 1.390(4) |
| C8   | C9   | 1.394(4) |

**Table S5 Bond Angles for exp\_7471.**

| Atom | Atom | Atom | Angle/°    |
|------|------|------|------------|
| C5   | N1   | O3   | 111.75(19) |
| C1   | O1   | C4   | 110.48(19) |
| N1   | C5   | C6   | 123.6(2)   |
| N1   | C5   | C2   | 115.5(2)   |
| C2   | C5   | C6   | 120.9(2)   |
| C11  | C10  | C9   | 119.7(2)   |
| C2   | C3   | C4   | 110.2(2)   |
| C2   | C3   | C7   | 129.4(2)   |
| C7   | C3   | C4   | 120.0(2)   |
| C5   | C2   | C1   | 122.2(2)   |
| C3   | C2   | C5   | 130.2(2)   |
| C3   | C2   | C1   | 107.5(2)   |

|     |     |     |            |
|-----|-----|-----|------------|
| O1  | C10 | C2  | 108.9(2)   |
| O2  | C1  | C1  | 120.1(2)   |
| O2  | C1  | C2  | 131.0(2)   |
| O1  | C4  | C14 | 108.0(2)   |
| O1  | C4  | C3  | 102.82(18) |
| O1  | C4  | C13 | 106.7(2)   |
| C14 | C4  | C3  | 112.0(2)   |
| C14 | C4  | C13 | 112.2(2)   |
| C3  | C4  | C13 | 114.4(2)   |
| C10 | C11 | C12 | 120.8(2)   |
| C11 | C12 | C7  | 119.9(2)   |
| C7  | C8  | C9  | 120.7(2)   |
| C12 | C7  | C3  | 121.7(2)   |
| C8  | C7  | C3  | 119.4(2)   |
| C8  | C7  | C12 | 118.8(2)   |
| C10 | C9  | C8  | 120.0(2)   |

**Table S6 Torsion Angles for exp\_7471.**

| A   | B   | C   | D   | Angle/°   |
|-----|-----|-----|-----|-----------|
| O3  | N1  | C5  | C6  | -0.7(3)   |
| O3  | N1  | C5  | C2  | 179.8(2)  |
| N1  | C5  | C2  | C3  | -163.6(3) |
| N1  | C5  | C2  | C1  | 17.7(3)   |
| C6  | C5  | C2  | C3  | 16.9(4)   |
| C6  | C5  | C2  | C1  | -161.8(2) |
| C5  | C2  | C1  | O1  | -179.6(2) |
| C5  | C2  | C1  | O2  | 0.0(4)    |
| C10 | C11 | C12 | C7  | 0.4(4)    |
| C3  | C2  | C1  | O1  | 1.5(3)    |
| C3  | C2  | C1  | O2  | -178.9(3) |
| C2  | C3  | C4  | O1  | 0.2(3)    |
| C2  | C3  | C4  | C14 | -115.4(2) |
| C2  | C3  | C4  | C13 | 115.5(2)  |
| C2  | C3  | C7  | C12 | -119.8(3) |
| C2  | C3  | C7  | C8  | 61.9(4)   |
| C1  | O1  | C4  | C14 | 119.2(2)  |
| C1  | O1  | C4  | C3  | 0.7(3)    |
| C1  | O1  | C4  | C13 | -120.0(2) |
| C4  | O1  | C1  | O2  | 179.0(2)  |
| C4  | O1  | C1  | C2  | -1.3(3)   |
| C4  | C3  | C2  | C5  | -179.8(2) |
| C4  | C3  | C2  | C1  | -1.0(3)   |
| C4  | C3  | C7  | C12 | 68.5(3)   |

|     |     |     |     |           |
|-----|-----|-----|-----|-----------|
| C4  | C3  | C7  | C8  | -109.8(3) |
| C11 | C10 | C9  | C8  | 0.7(4)    |
| C11 | C12 | C7  | C3  | -177.6(2) |
| C11 | C12 | C7  | C8  | 0.7(4)    |
| C7  | C3  | C2  | C5  | 7.8(4)    |
| C7  | C3  | C2  | C1  | -173.3(2) |
| C7  | C3  | C4  | O1  | 173.4(2)  |
| C7  | C3  | C4  | C14 | 57.7(3)   |
| C7  | C3  | C4  | C13 | -71.3(3)  |
| C7  | C8  | C9  | C10 | 0.5(4)    |
| C9  | C10 | C11 | C12 | -1.1(4)   |
| C9  | C8  | C7  | C3  | 177.2(2)  |
| C9  | C8  | C7  | C12 | -1.2(4)   |

**Table S7 Hydrogen Atom Coordinates ( $\text{\AA}\times 10^4$ ) and Isotropic Displacement Parameters ( $\text{\AA}^2\times 10^3$ ) for exp\_7471.**

| Atom | <i>x</i> | <i>y</i> | <i>z</i> | U(eq) |
|------|----------|----------|----------|-------|
| H3   | 9073     | 7159     | -194     | 39    |
| H6A  | 10262    | 4989     | 512      | 38    |
| H6B  | 10510    | 5248     | 1001     | 38    |
| H6C  | 11606    | 6049     | 671      | 38    |
| H10  | 14846    | 5494     | 1984     | 33    |
| H14A | 10263    | 10696    | 1667     | 45    |
| H14B | 10632    | 9807     | 2099     | 45    |
| H14C | 9187     | 10888    | 2074     | 45    |
| H11  | 12580    | 4629     | 2262     | 34    |
| H12  | 10281    | 5640     | 2042     | 30    |
| H8   | 12529    | 8343     | 1229     | 26    |
| H9   | 14823    | 7339     | 1461     | 31    |
| H13A | 7474     | 8757     | 2286     | 44    |
| H13B | 8867     | 7610     | 2314     | 44    |
| H13C | 7461     | 7230     | 2019     | 44    |

4. The cell variance of *S. sclerotiorum* treated with **VI-3** and **TRI** observed by TEM

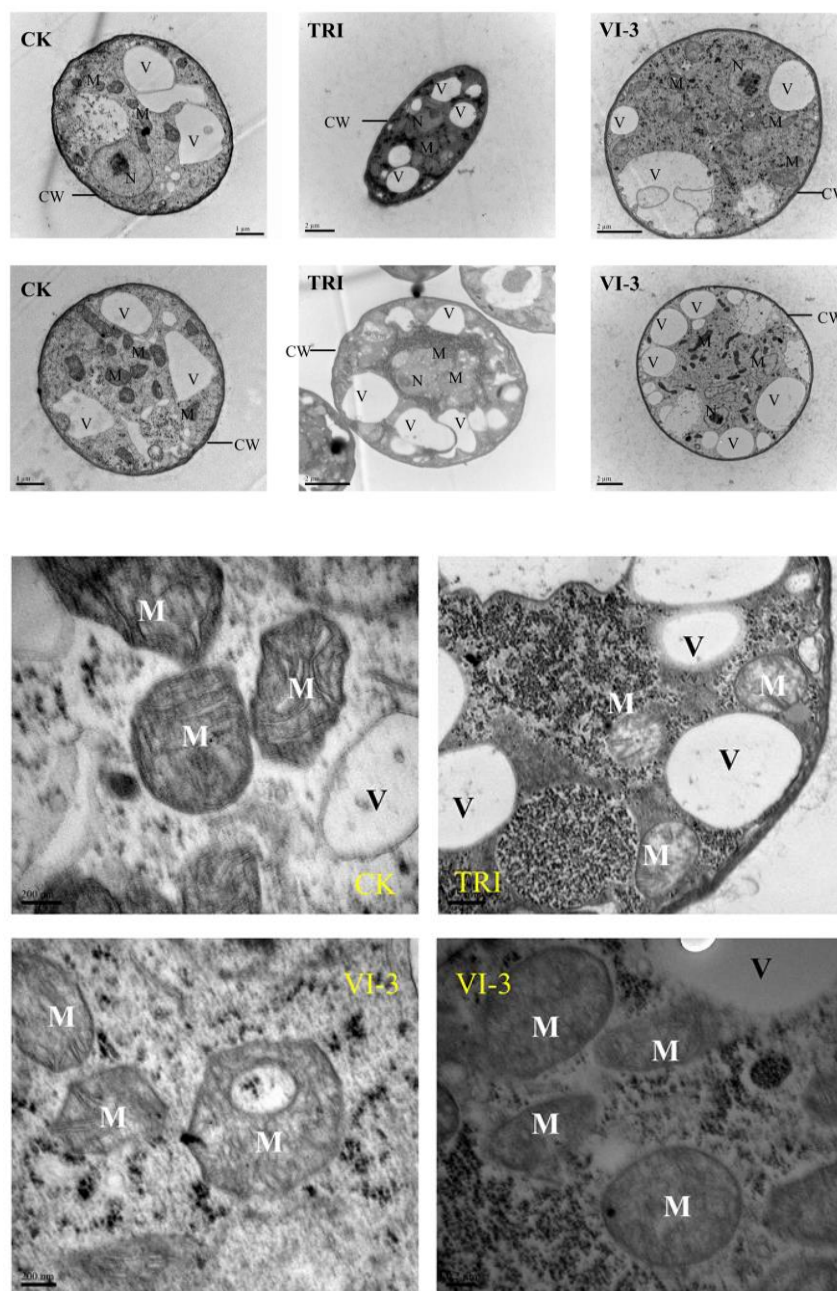

**Figure S83** The cell variance of *S. sclerotiorum* treated with **VI-3** and **TRI** observed by TEM

Note: CW: cell wall; N: nucleus; M: mitochondrion; V: vacuole

5. The mycelium growth inhibition of *S. sclerotiorum* treated with **VI-3** and **TRI** by SEM

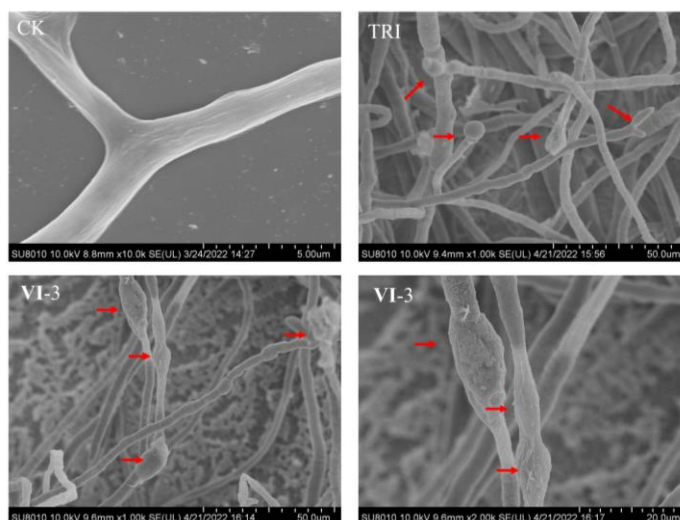

**Figure S84** The mycelium growth inhibition of *S. sclerotiorum* treated with **VI-3** and **TRI** by SEM



6. Interaction of compounds **V-3**, **V-6**, **VI-7** and **TRI** with target by molecular docking

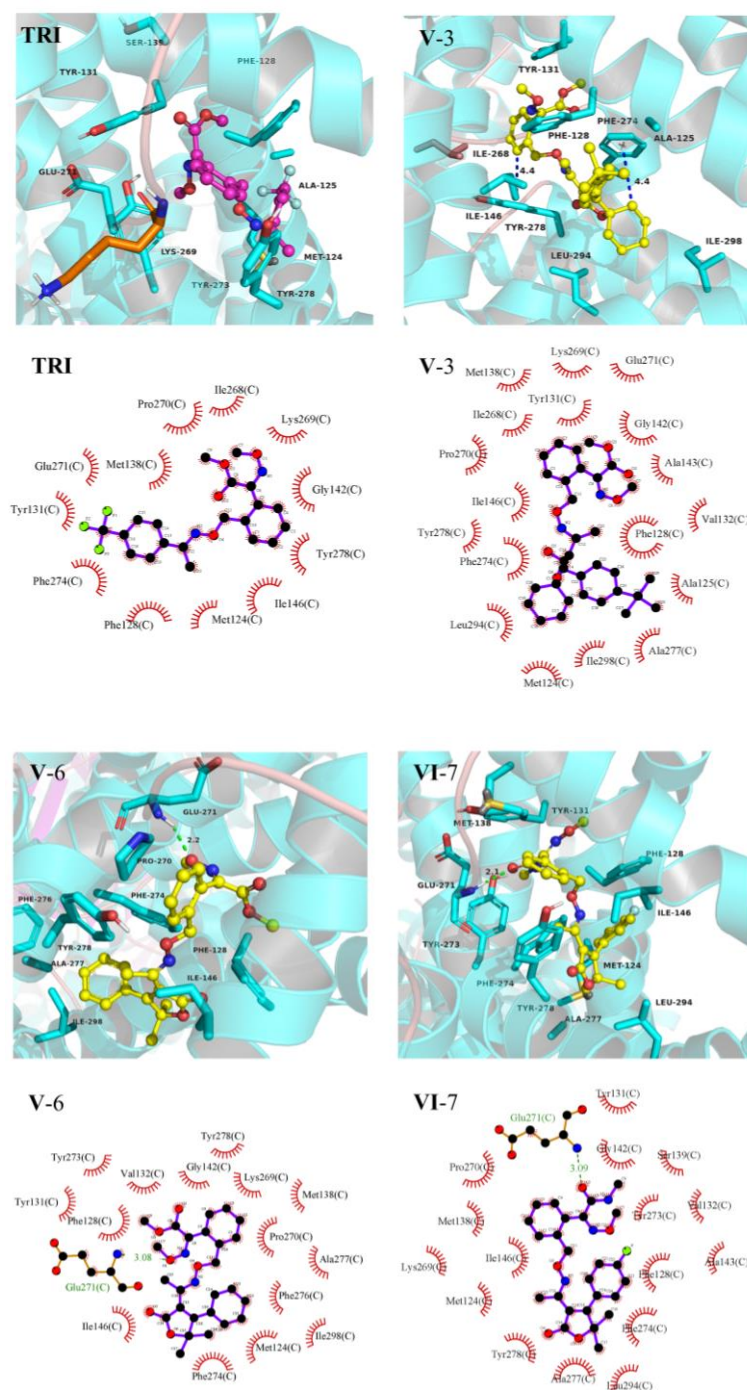

**Figure S85** Interaction of compounds **V-3**, **V-6**, **VI-7** and **TRI** with target by molecular docking

References

- [1] Zhang, Q., Li, Y., Xu, L., Ma, H., Li, X., Wang, M., Synthesis and Fungicidal Activity of Novel Butenolide Compounds Containing Oxime Ether Moiety. *Chin. J. Org. Chem.*, **2022**, 42, 2438-2448.
